# Supplementary material for: ML212: A small-molecule probe for investigating fluconazole resistance mechanisms in Candida albicans
Source: publisher site journal article supplement (doi:10.3762/bjoc.9.171), 2013-07-26

## Supporting Information

for

### **ML212: A small-molecule probe for investigating fluconazole resistance mechanisms in *Candida albicans***

Willmen Youngsaye<sup>1</sup>, Cathy L. Hartland<sup>1</sup>, Barbara J. Morgan<sup>1</sup>, Amal Ting<sup>1</sup>, Partha P. Nag<sup>1</sup>, Benjamin Vincent<sup>2,3</sup>, Carrie A. Mosher<sup>1</sup>, Joshua A. Bittker<sup>1</sup>, Sivaraman Dandapani<sup>1</sup>, Michelle Palmer<sup>1</sup>, Luke Whitesell<sup>2</sup>, Susan Lindquist<sup>2,4</sup>, Stuart L. Schreiber<sup>1,5</sup> and Benito Munoz<sup>1,\*</sup>

Address: <sup>1</sup>Chemical Biology Platform and Probe Development Center, Broad Institute of MIT and Harvard, 7 Cambridge Center, Cambridge, MA 02142, USA, <sup>2</sup>Whitehead Institute for Biomedical Research, 9 Cambridge Center, Cambridge, MA 02142, USA, <sup>3</sup>Microbiology Graduate Program, Massachusetts Institute of Technology, 77 Massachusetts Avenue, Cambridge, MA 02139, USA, <sup>4</sup>Department of Biology and Howard Hughes Medical Institute, Massachusetts Institute of Technology, 77 Massachusetts Avenue, Cambridge, MA 02139, USA and <sup>5</sup>Howard Hughes Medical Institute, Broad Institute of Harvard and MIT, 7 Cambridge Center, Cambridge, MA 02142, USA

Email: Benito Munoz - [bmunoz@broadinstitute.org](mailto:bmunoz@broadinstitute.org)

\* Corresponding author

### **NMR spectra of reported compounds**

<sup>1</sup>H NMR (300 MHz, CDCl<sub>3</sub>)

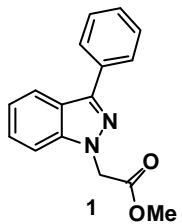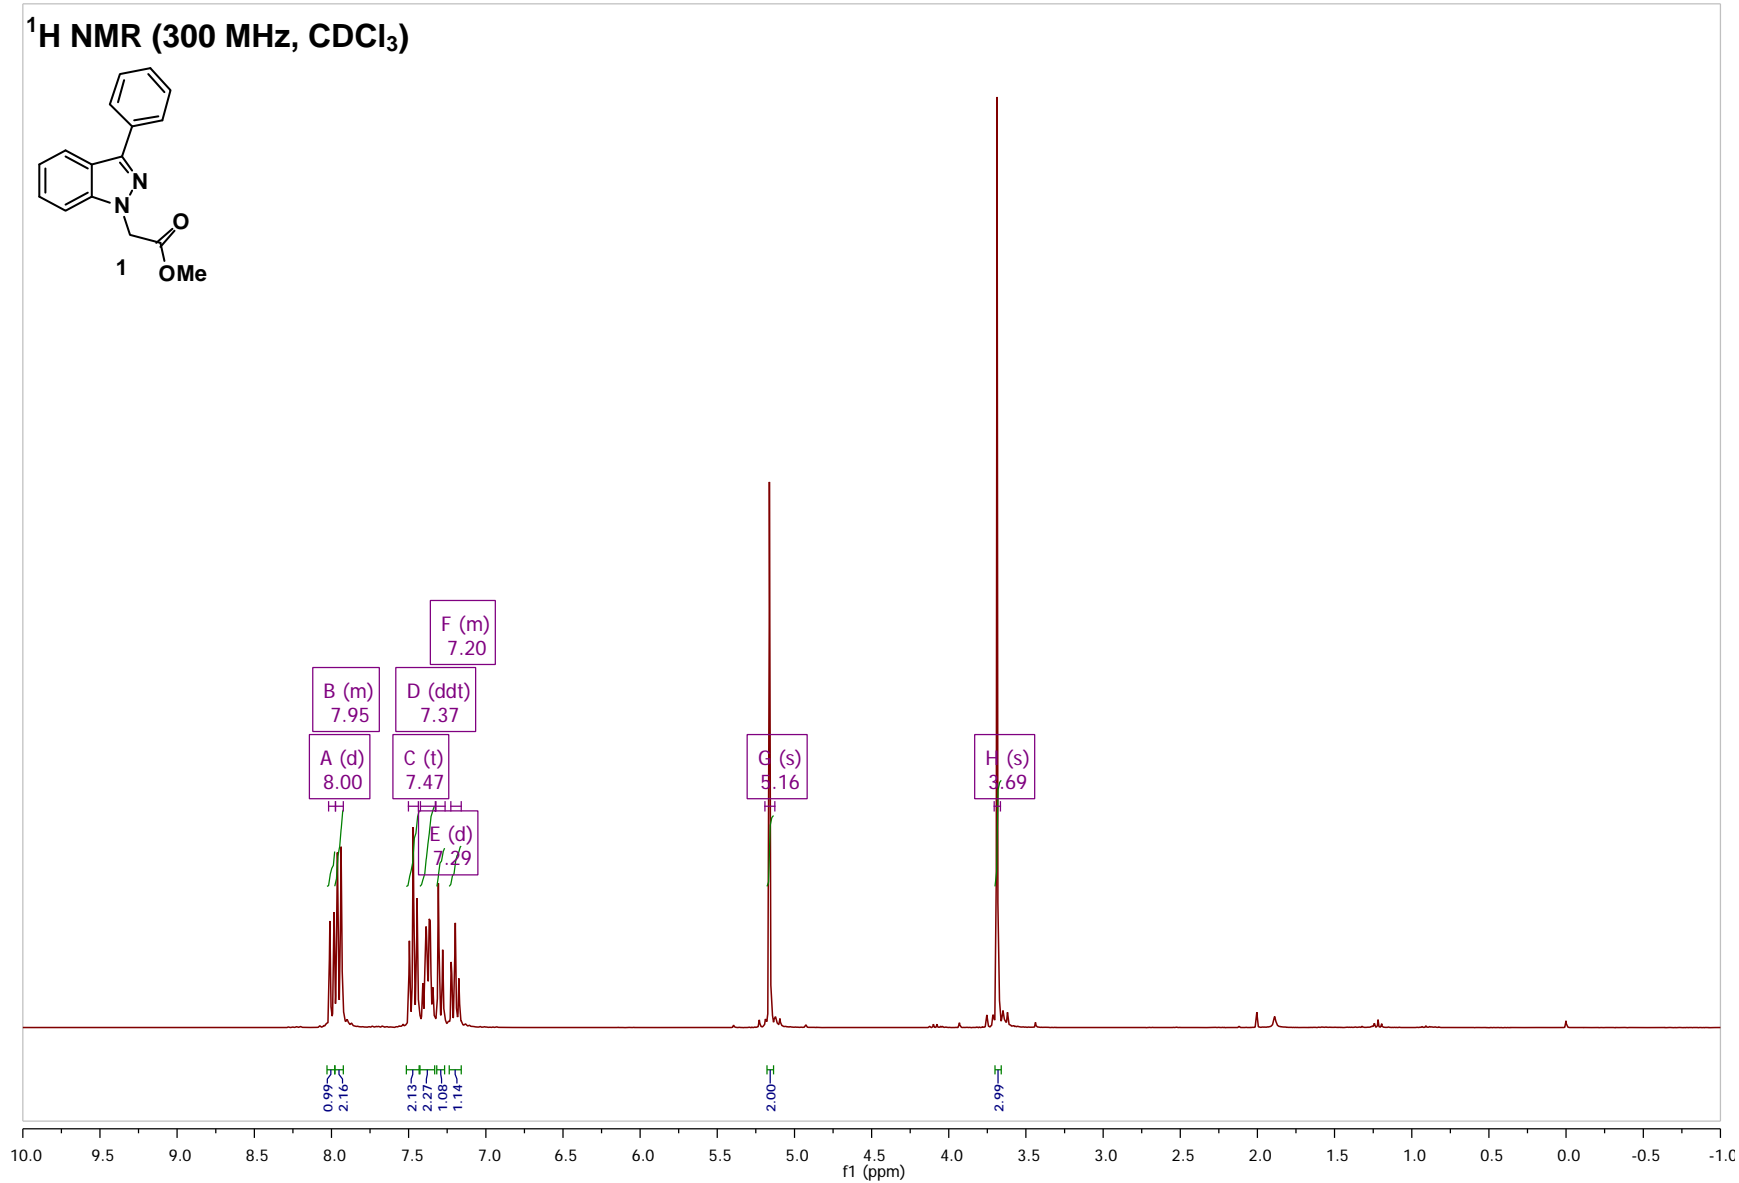

<sup>13</sup>C NMR (75 MHz, CDCl<sub>3</sub>)

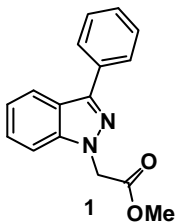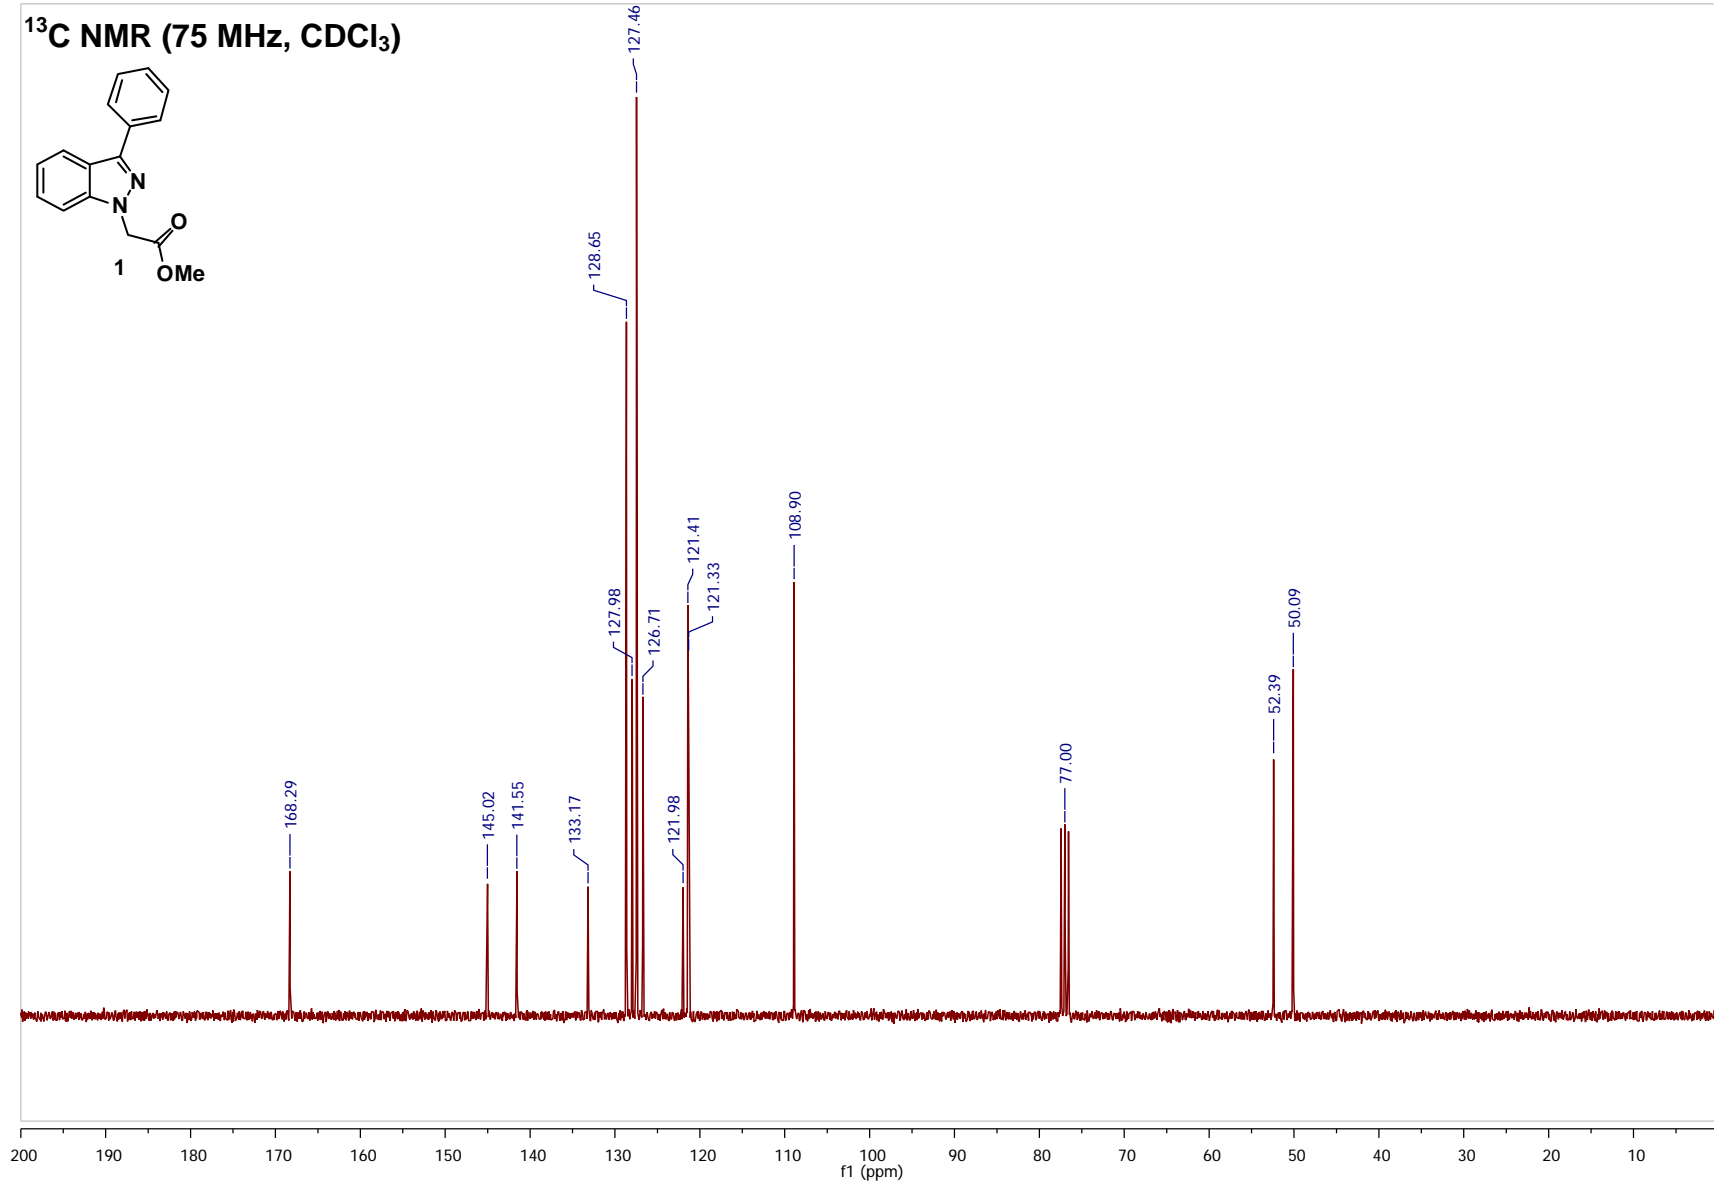

<sup>1</sup>H NMR (300 MHz, CDCl<sub>3</sub>)

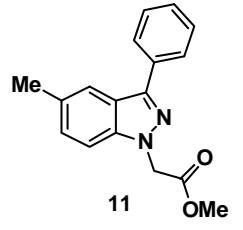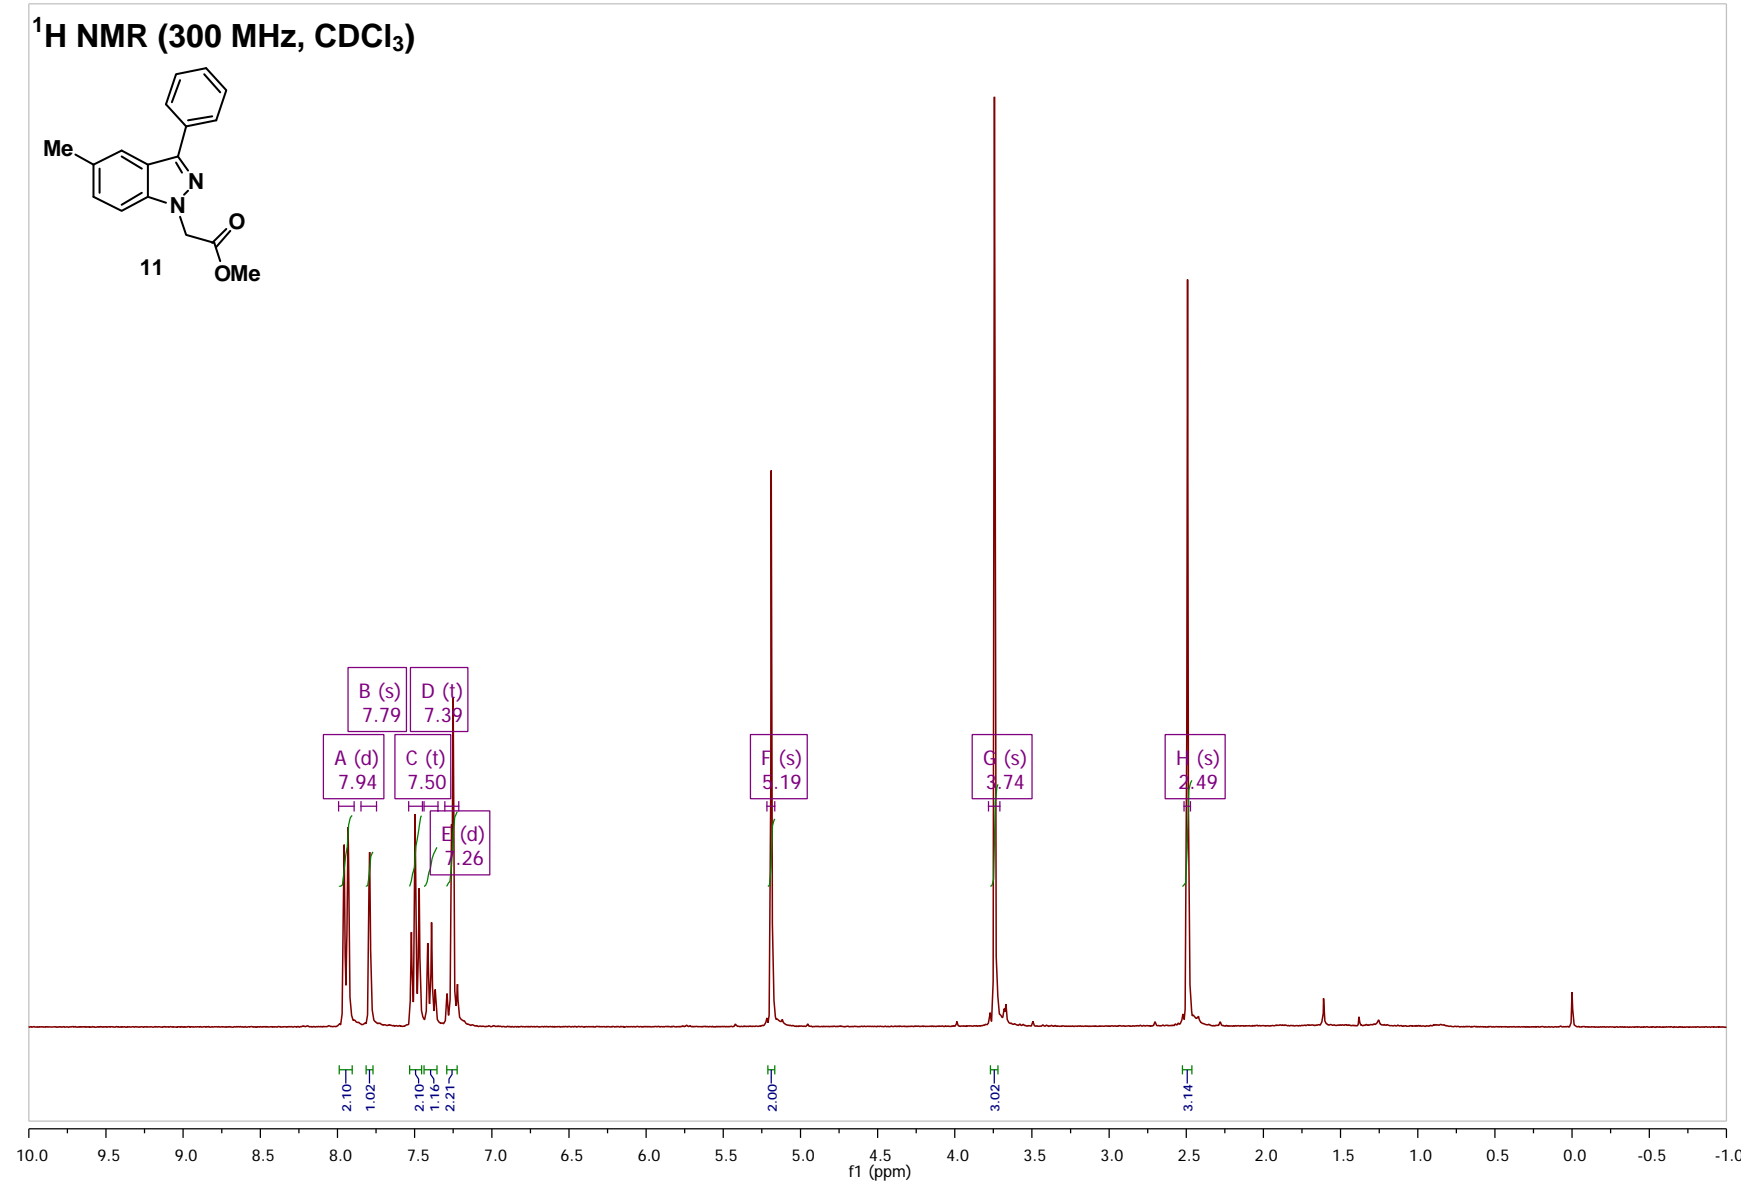

<sup>1</sup>H NMR (300 MHz, CDCl<sub>3</sub>)

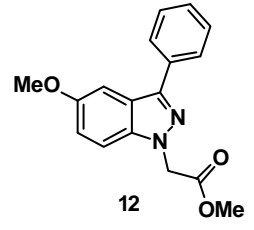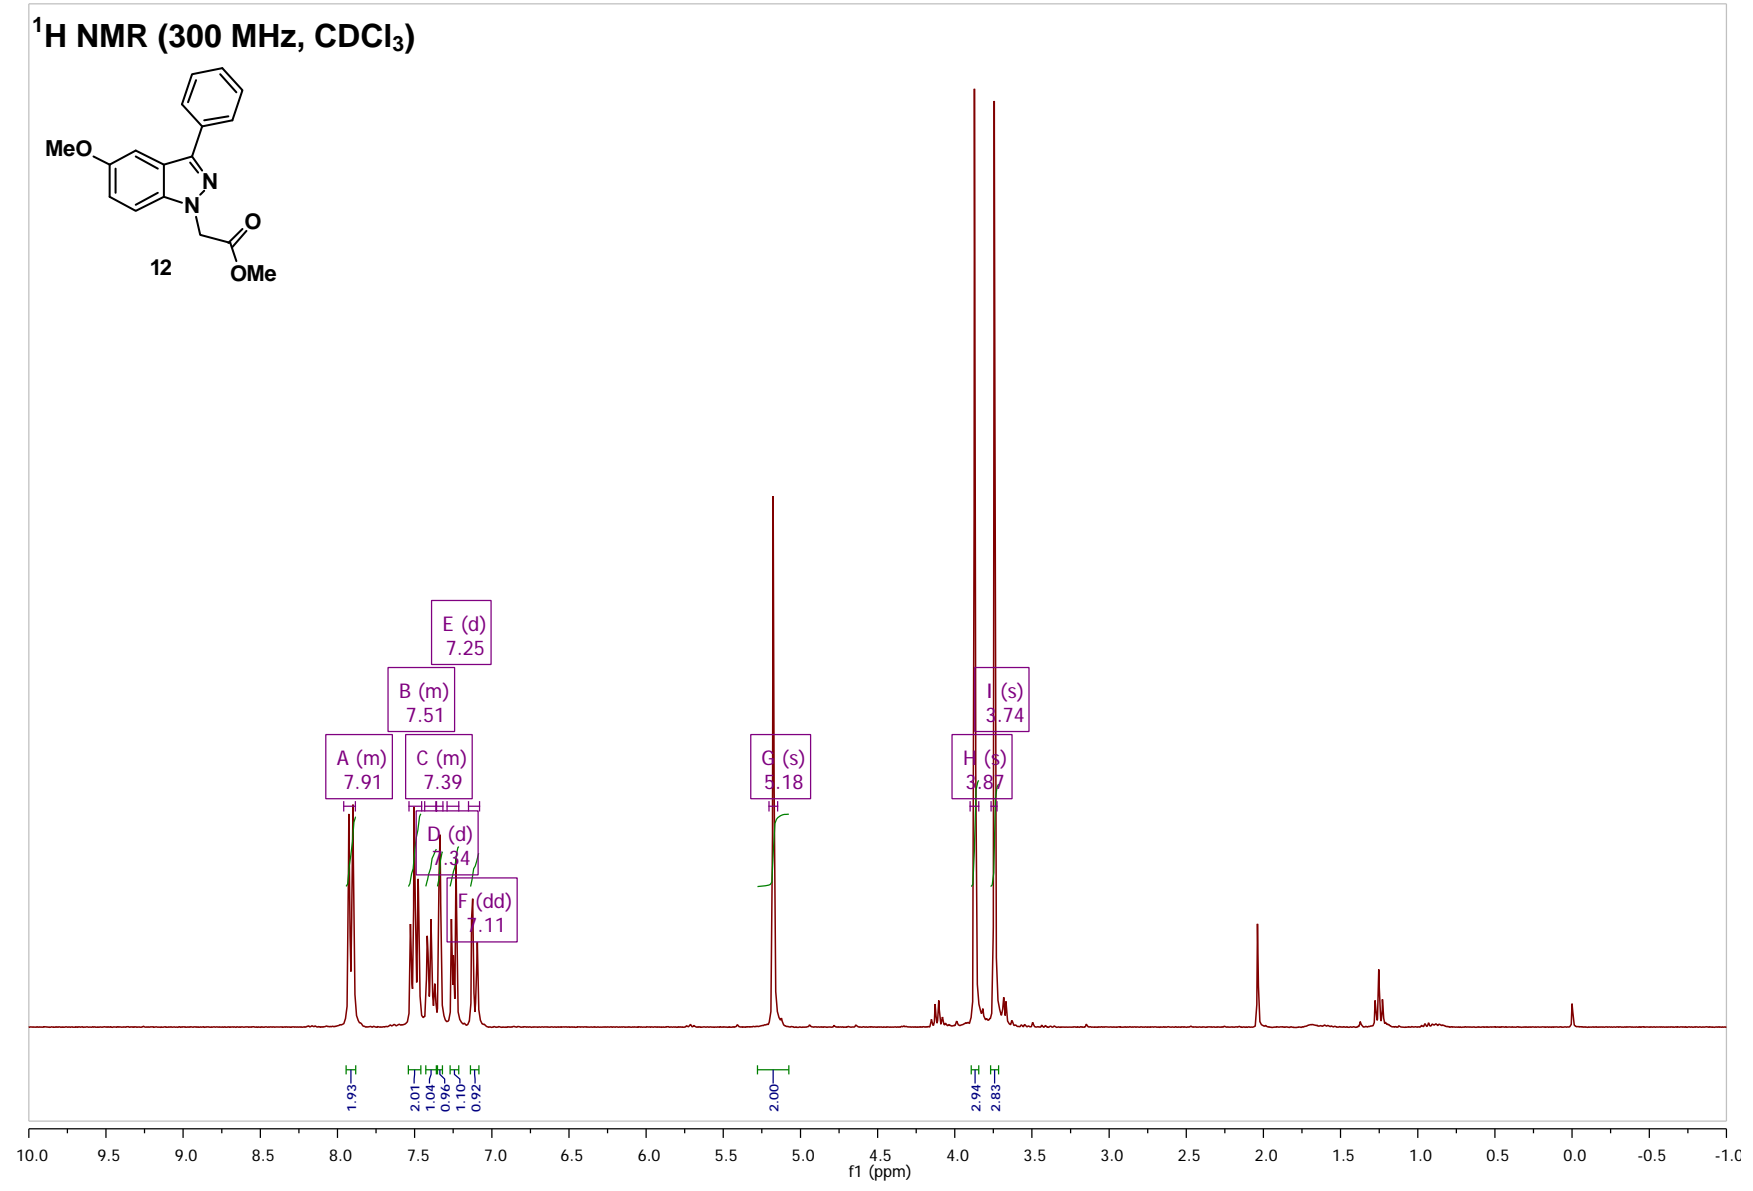

**<sup>13</sup>C NMR (75 MHz, CDCl<sub>3</sub>)**

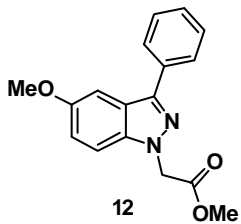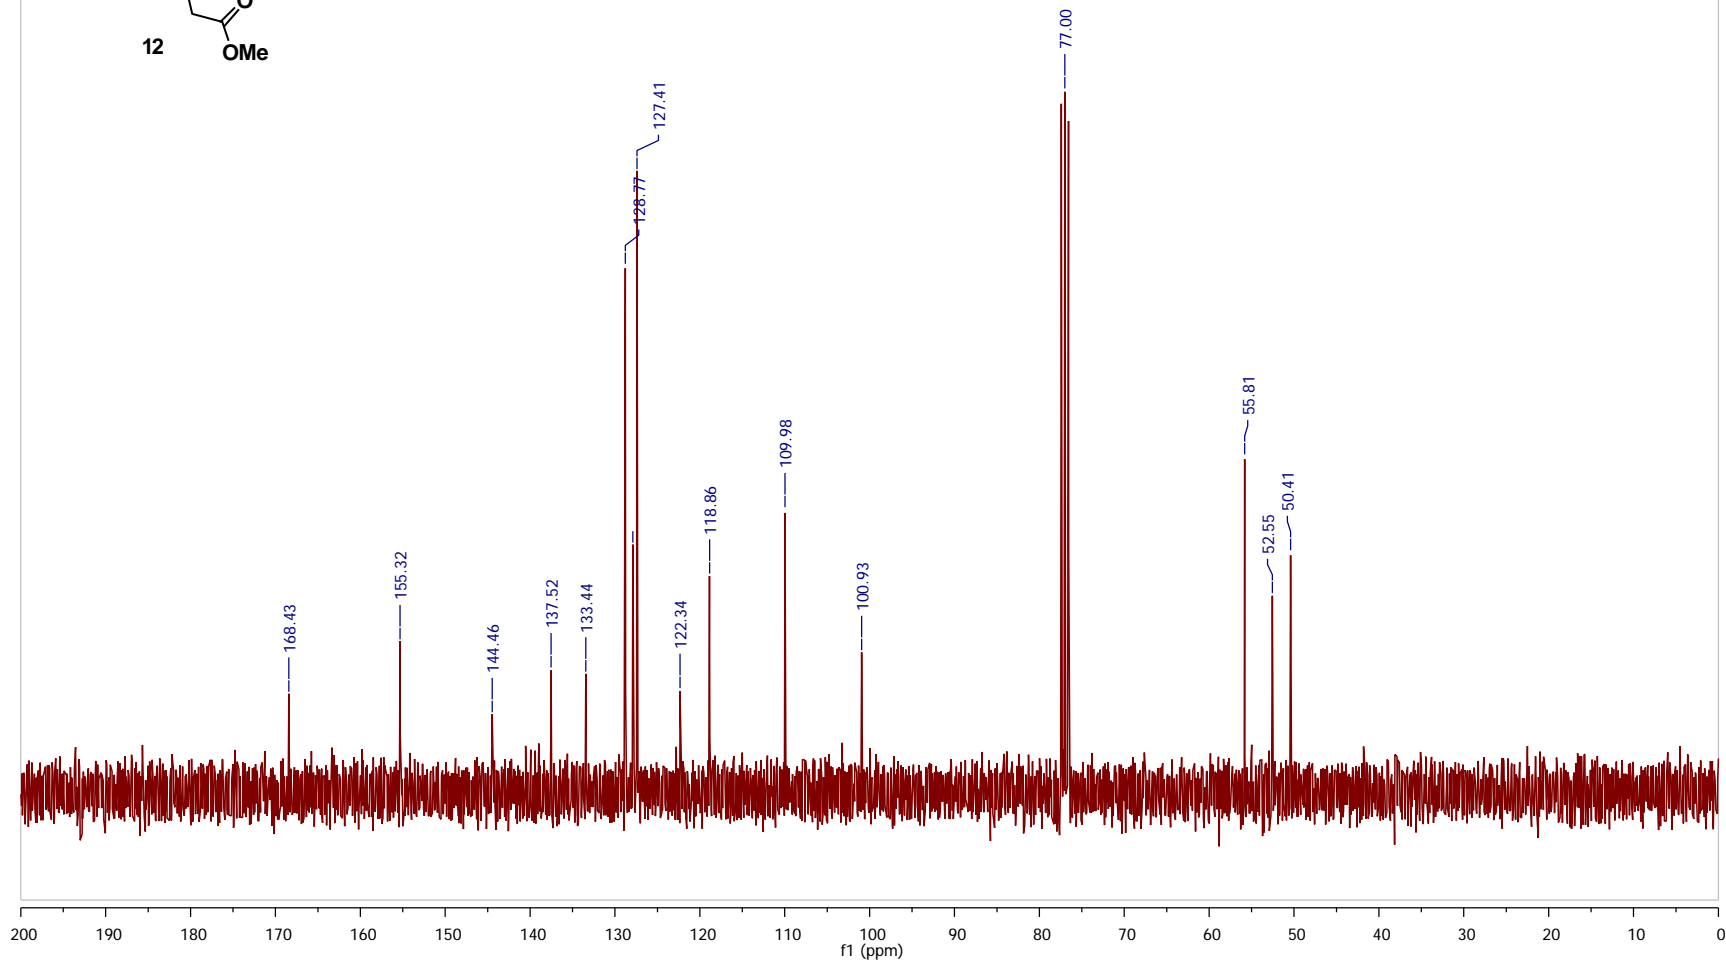

**<sup>1</sup>H NMR (300 MHz, CDCl<sub>3</sub>)**

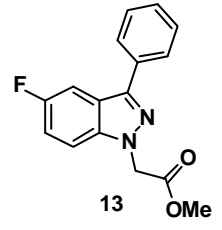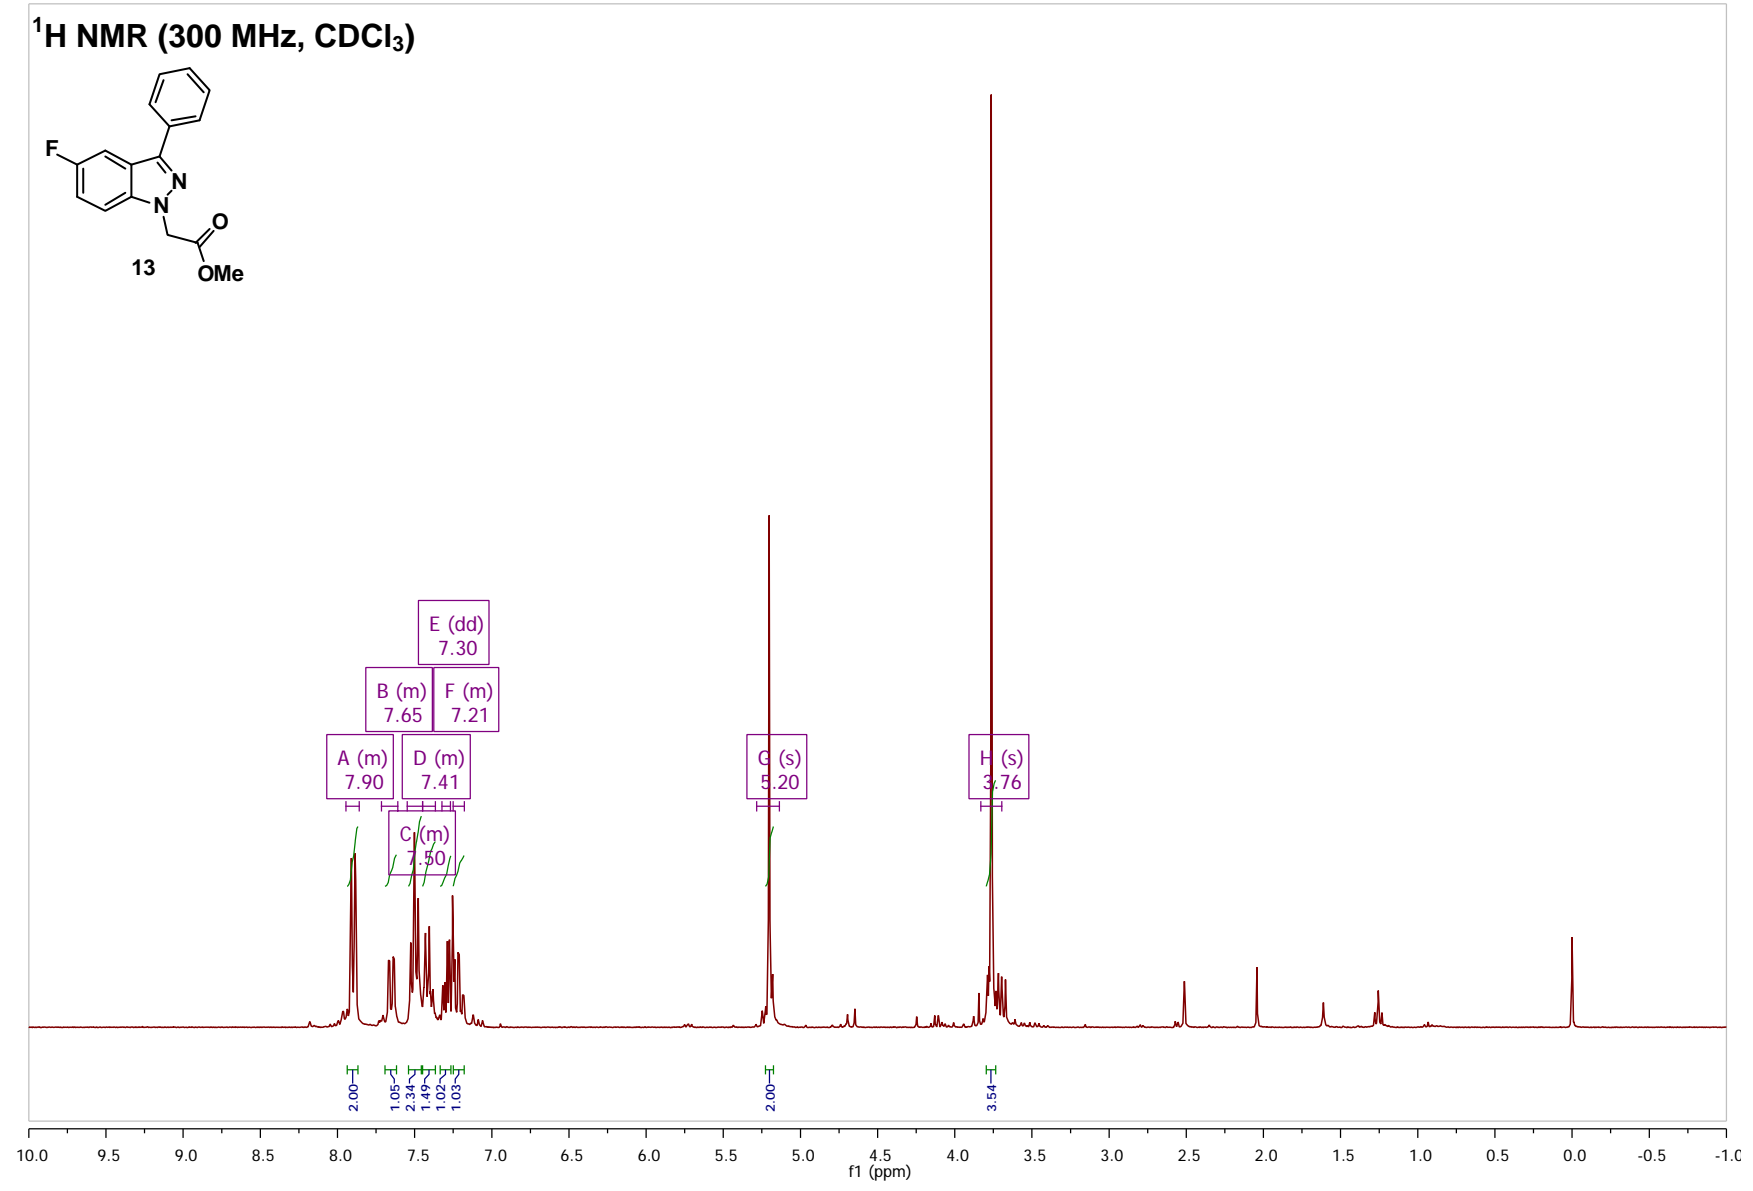

<sup>1</sup>H NMR (300 MHz, CDCl<sub>3</sub>)

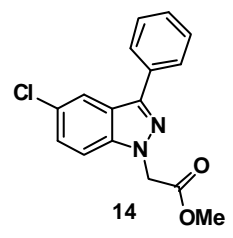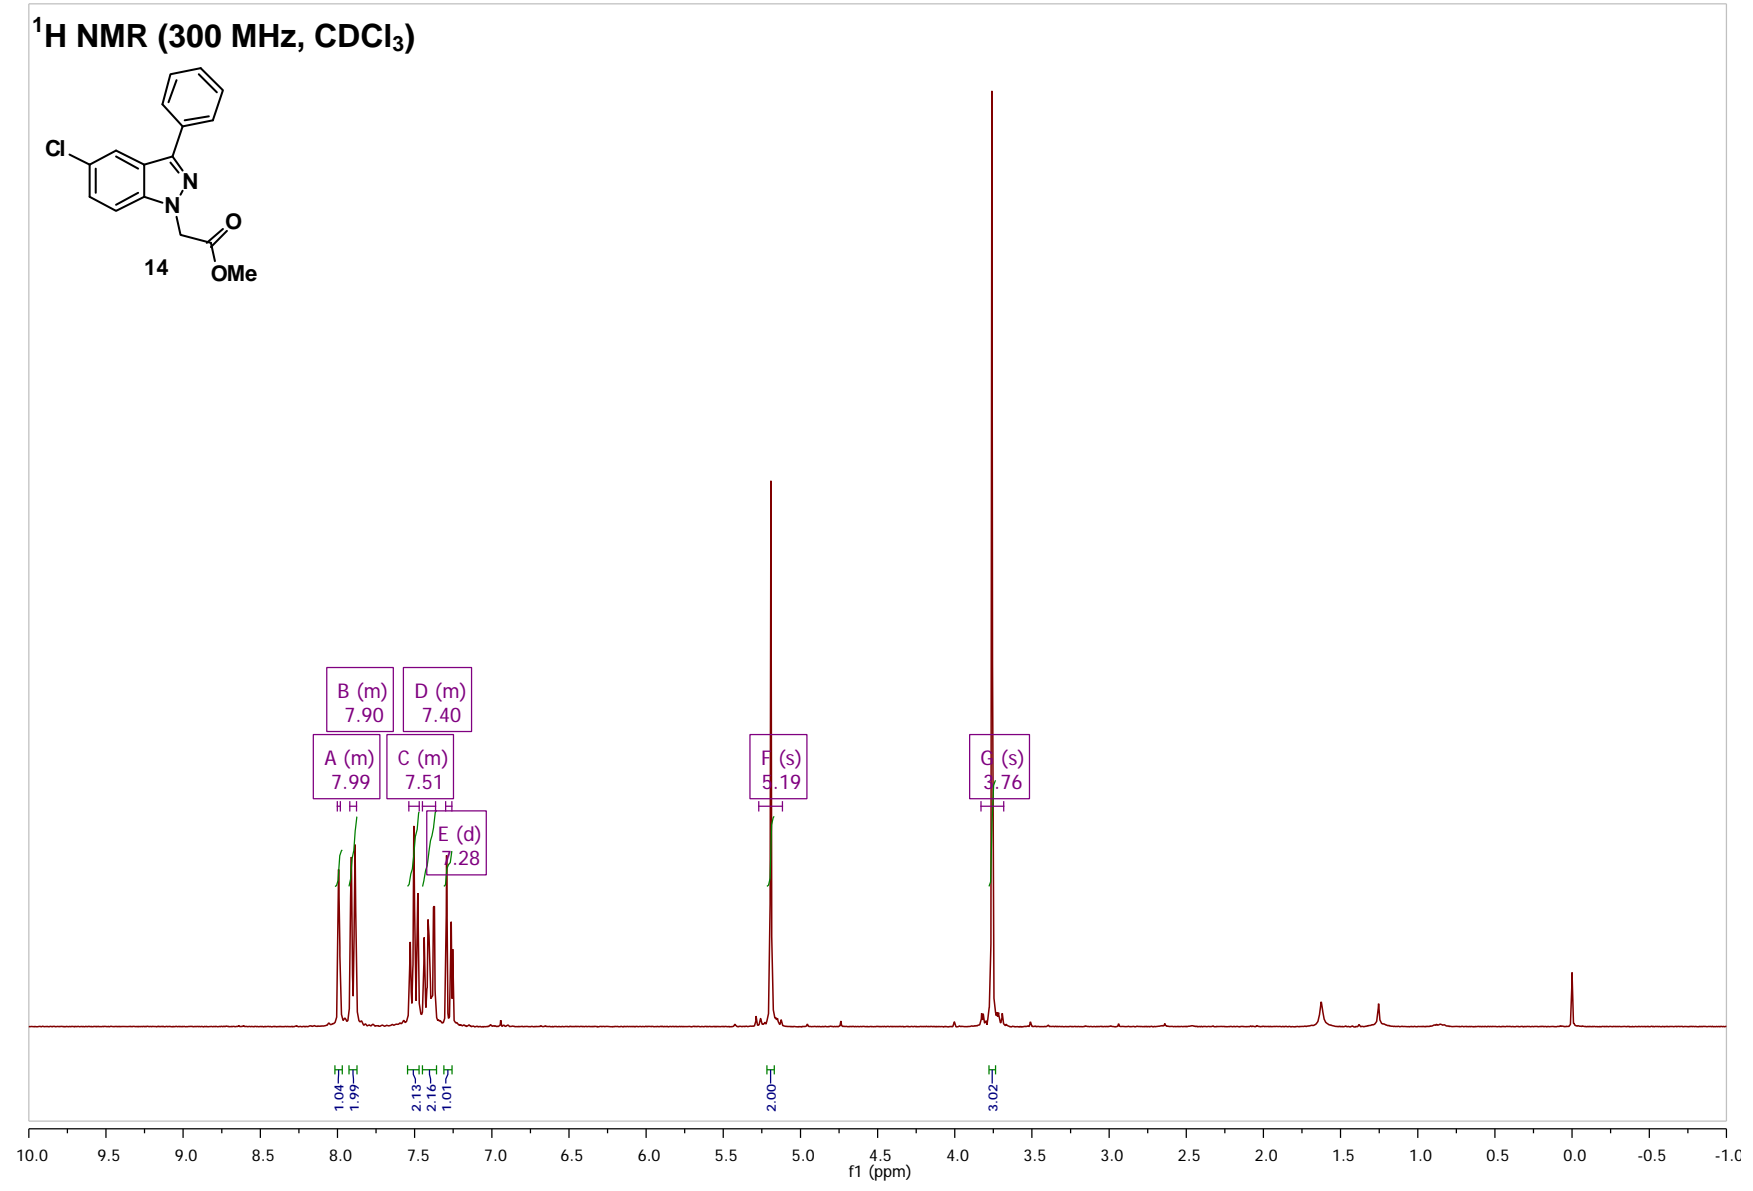



<sup>13</sup>C NMR (75 MHz, CDCl<sub>3</sub>)

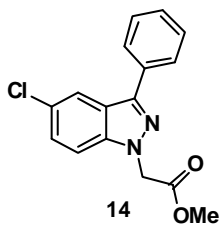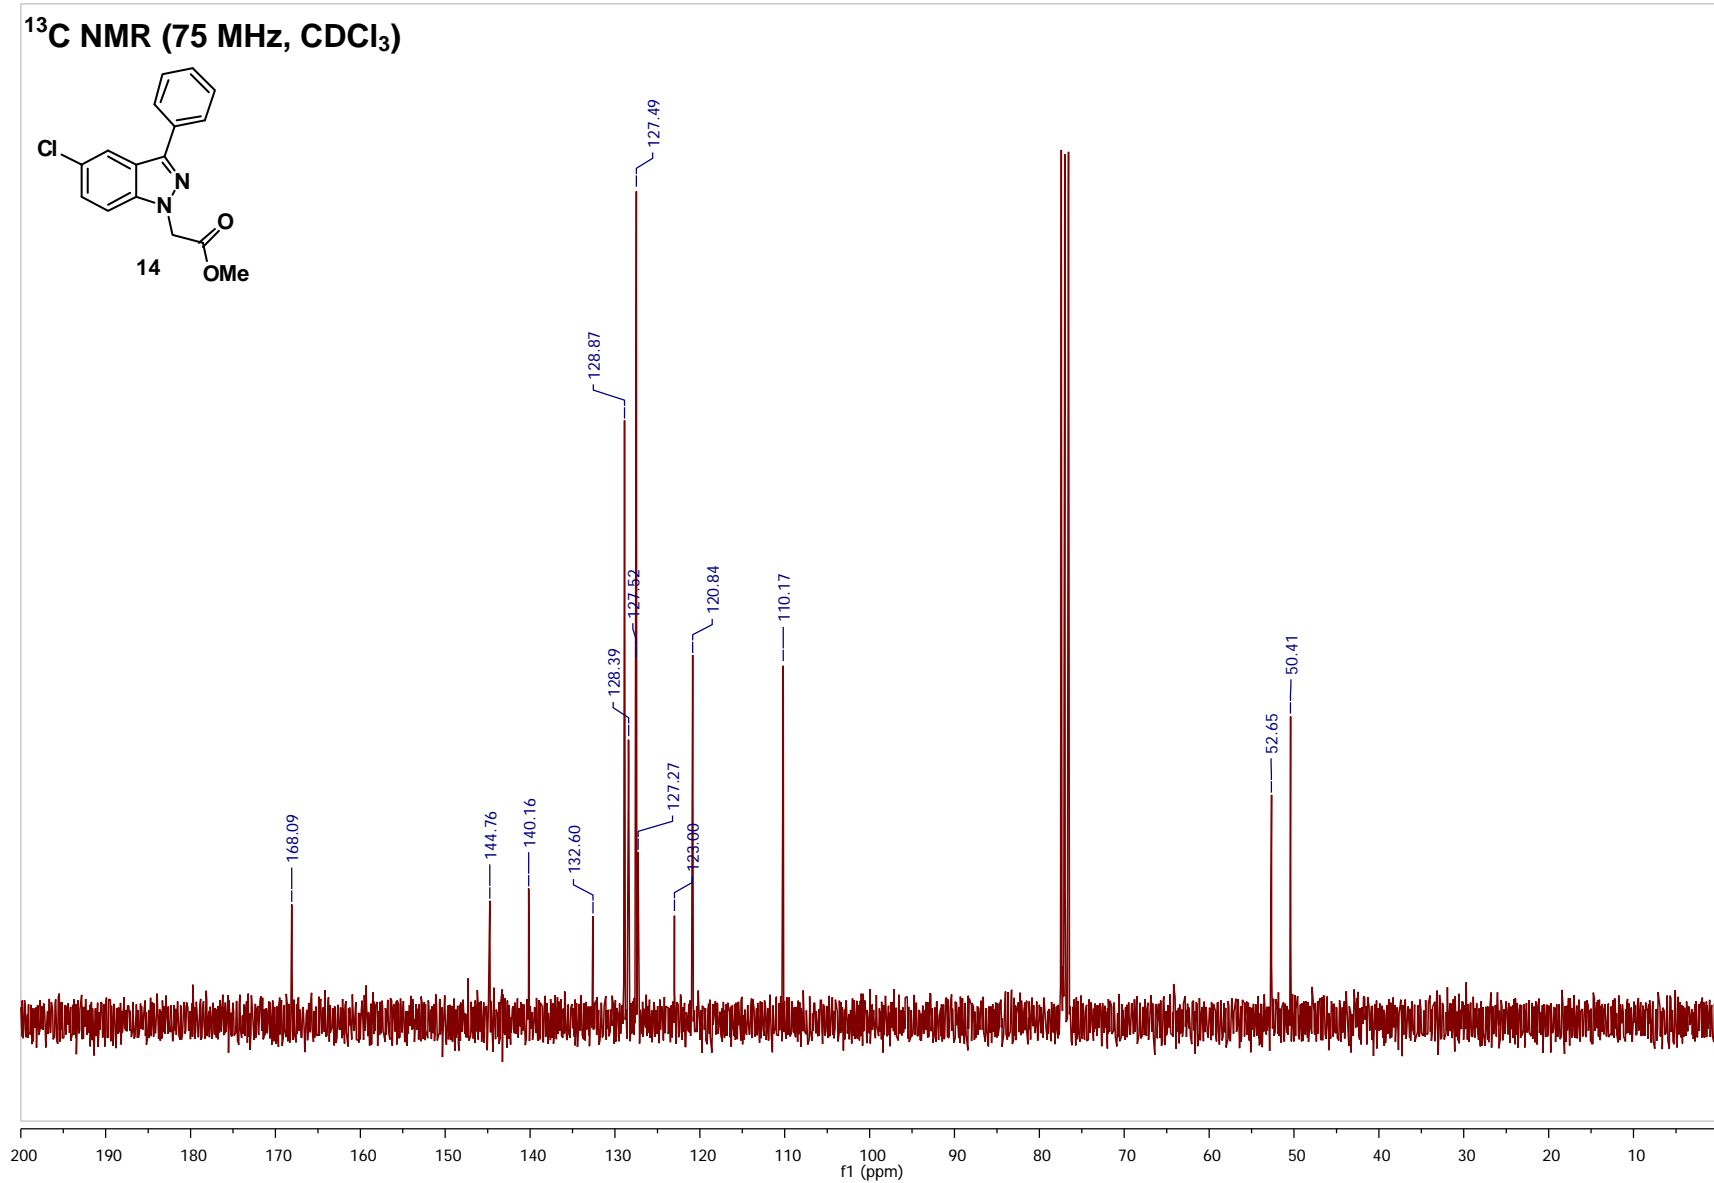

<sup>1</sup>H NMR (300 MHz, CDCl<sub>3</sub>)

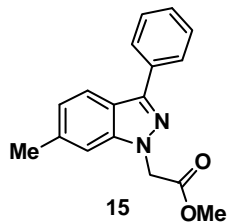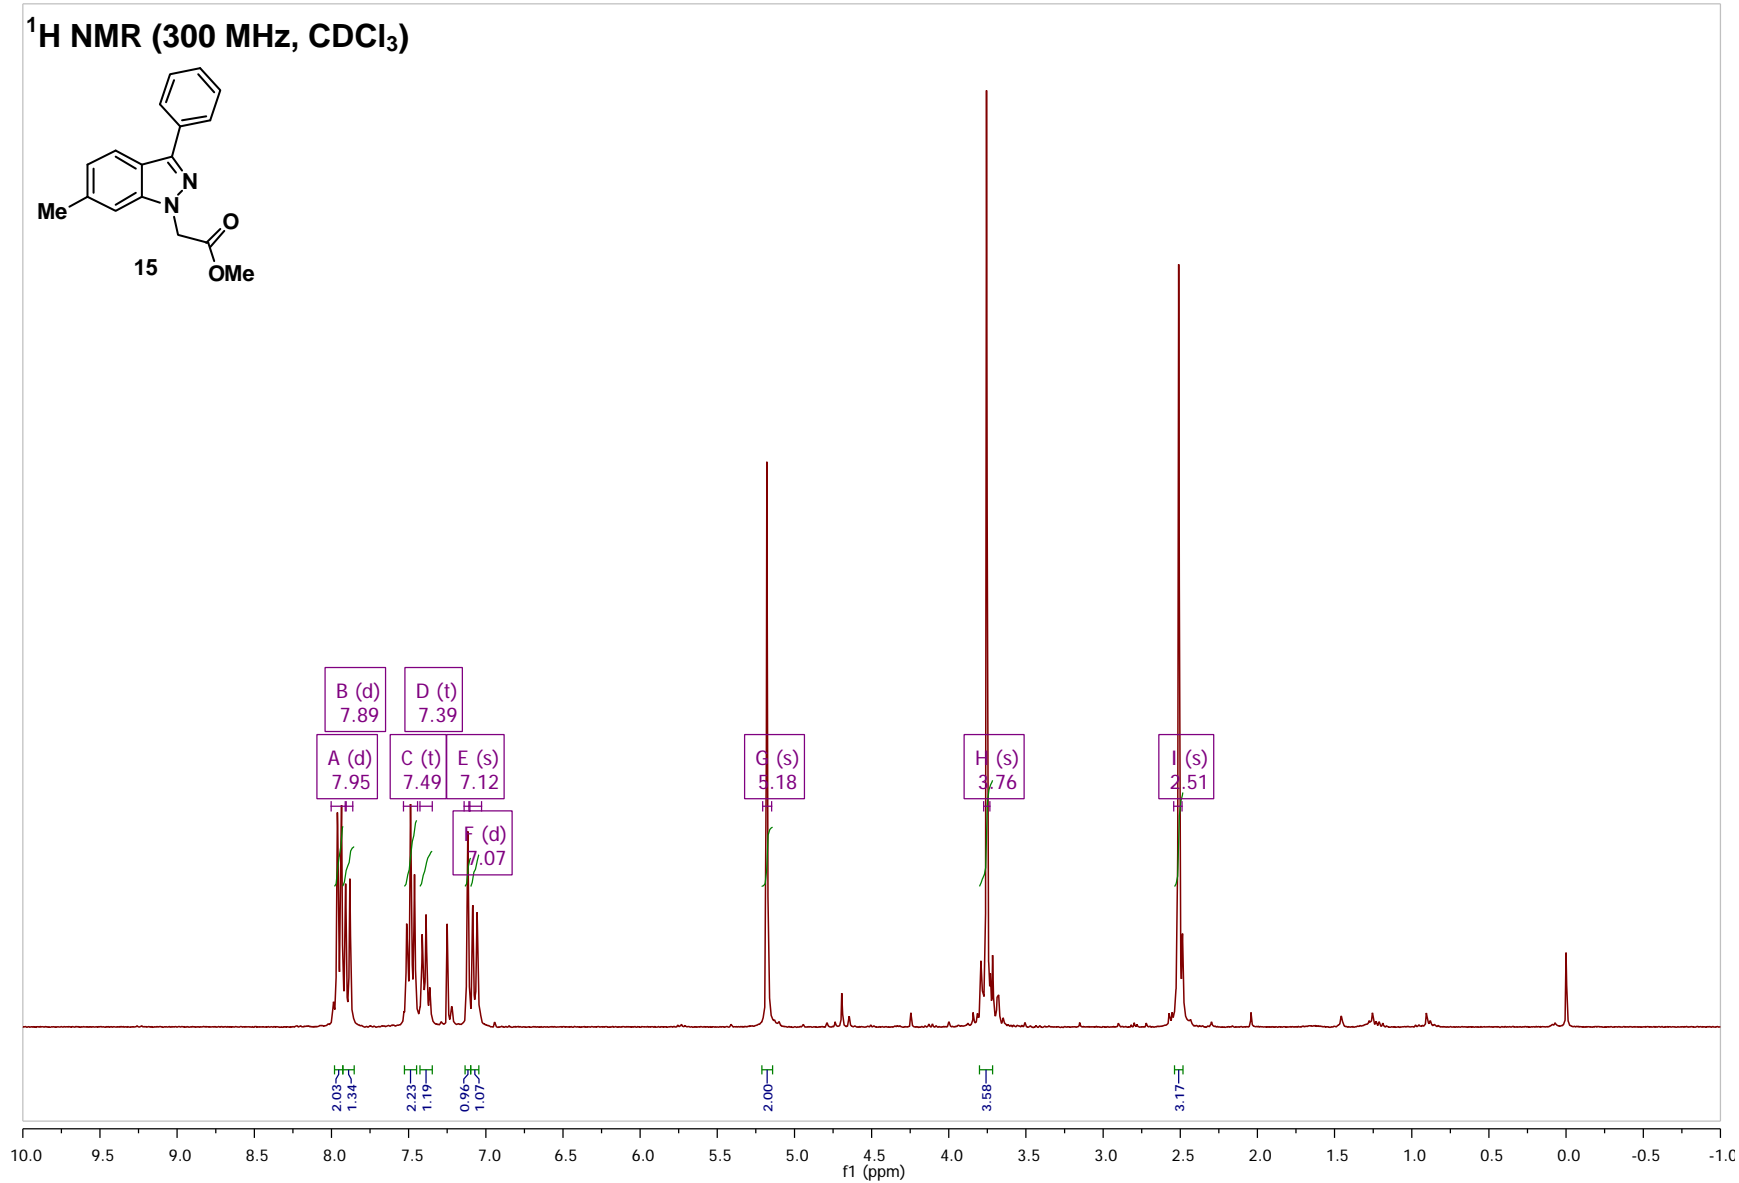

**<sup>1</sup>H NMR (300 MHz, CDCl<sub>3</sub>)**

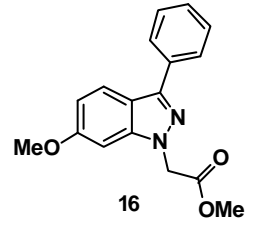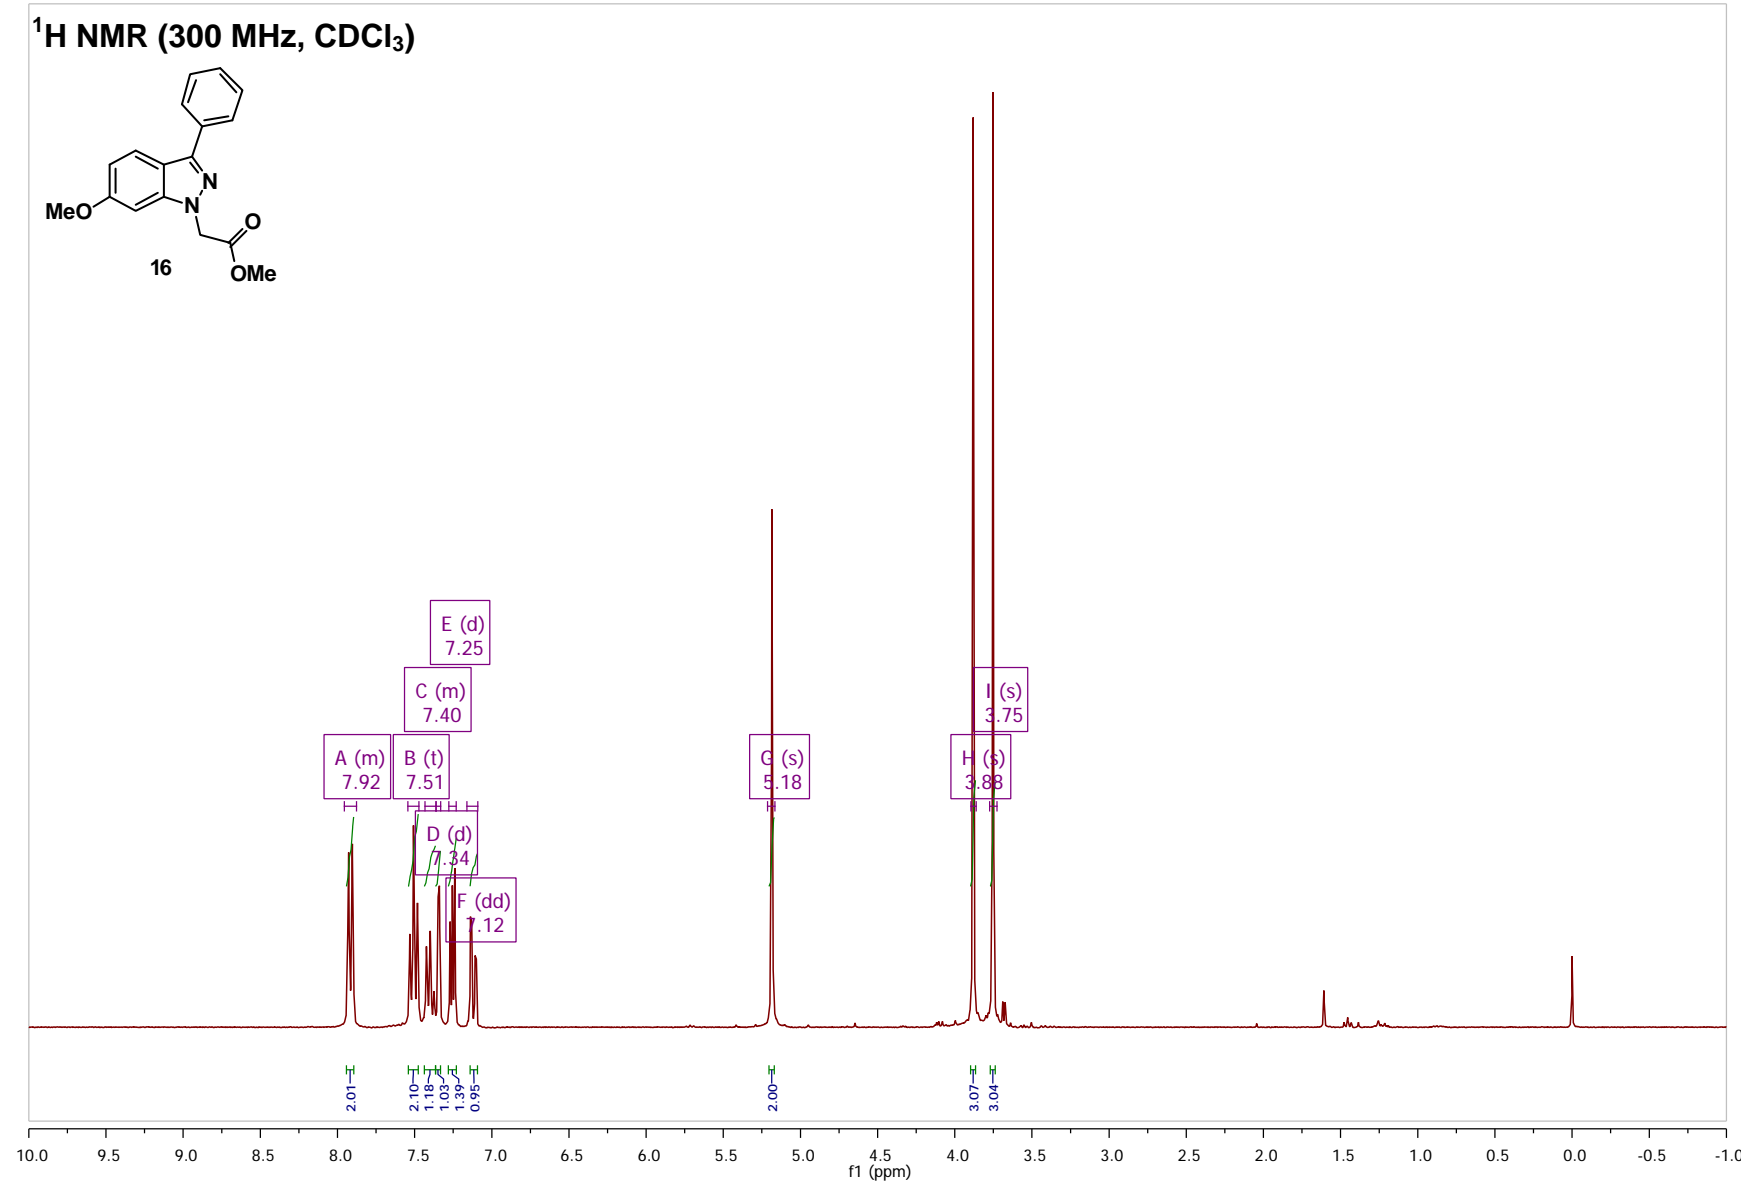

<sup>1</sup>H NMR (300 MHz, CDCl<sub>3</sub>)

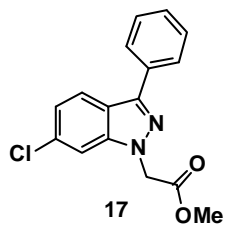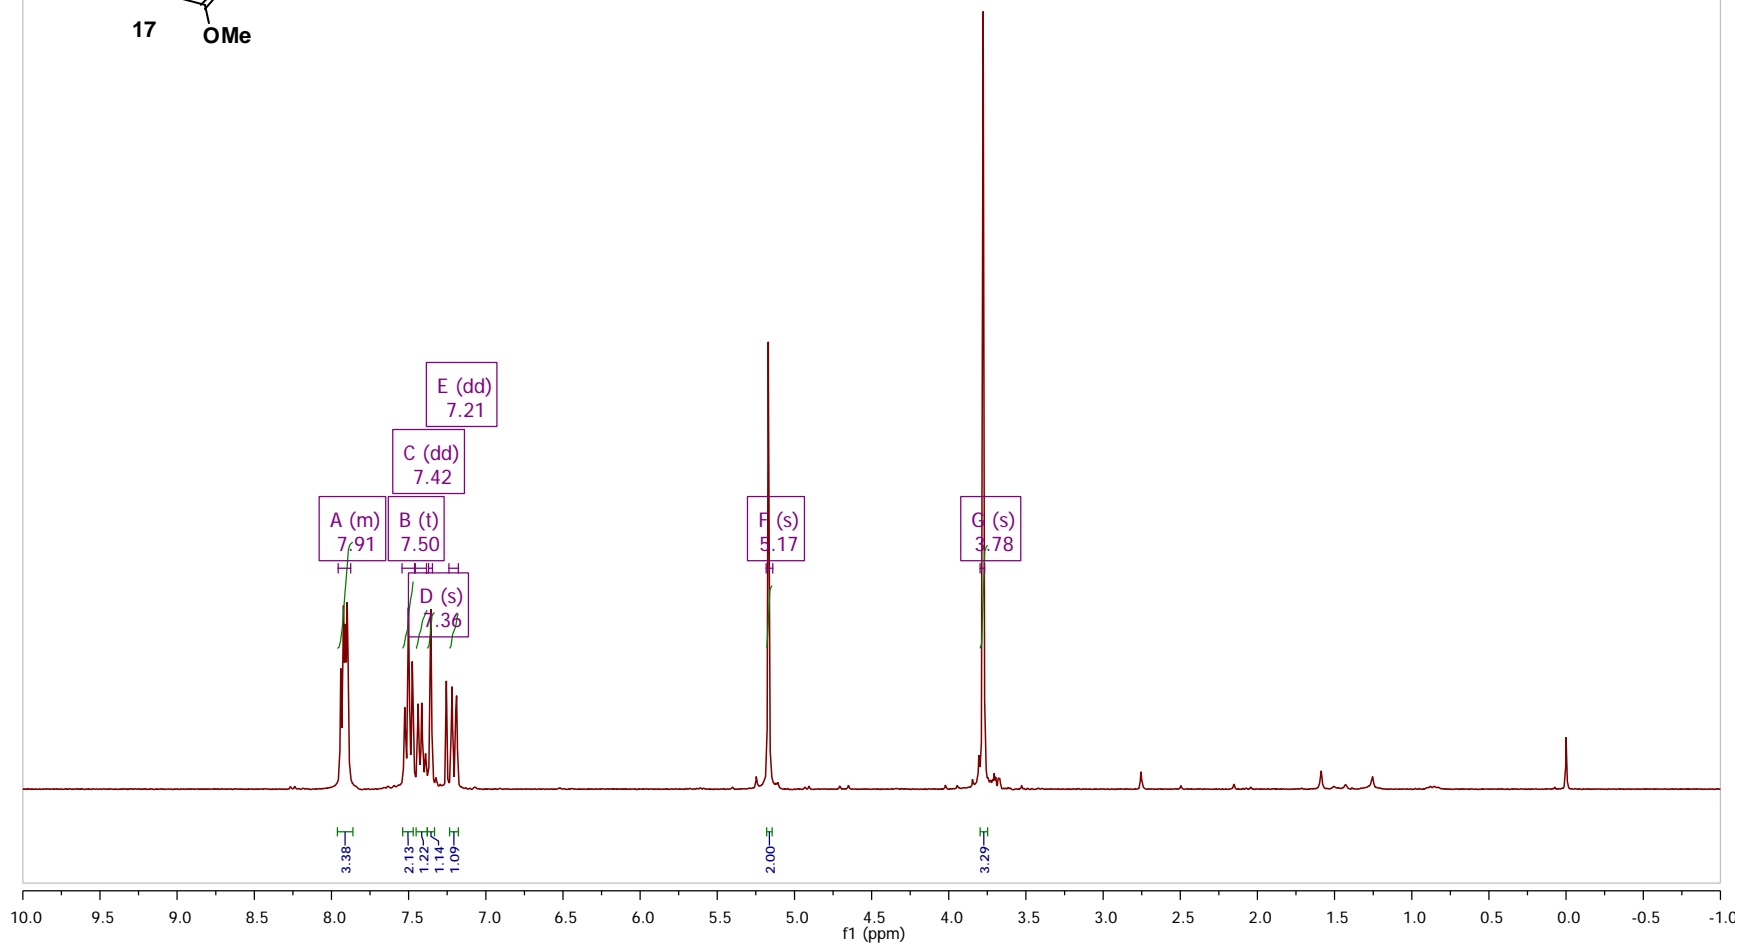

<sup>1</sup>H NMR (300 MHz, CDCl<sub>3</sub>)

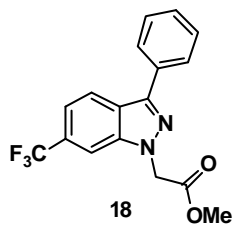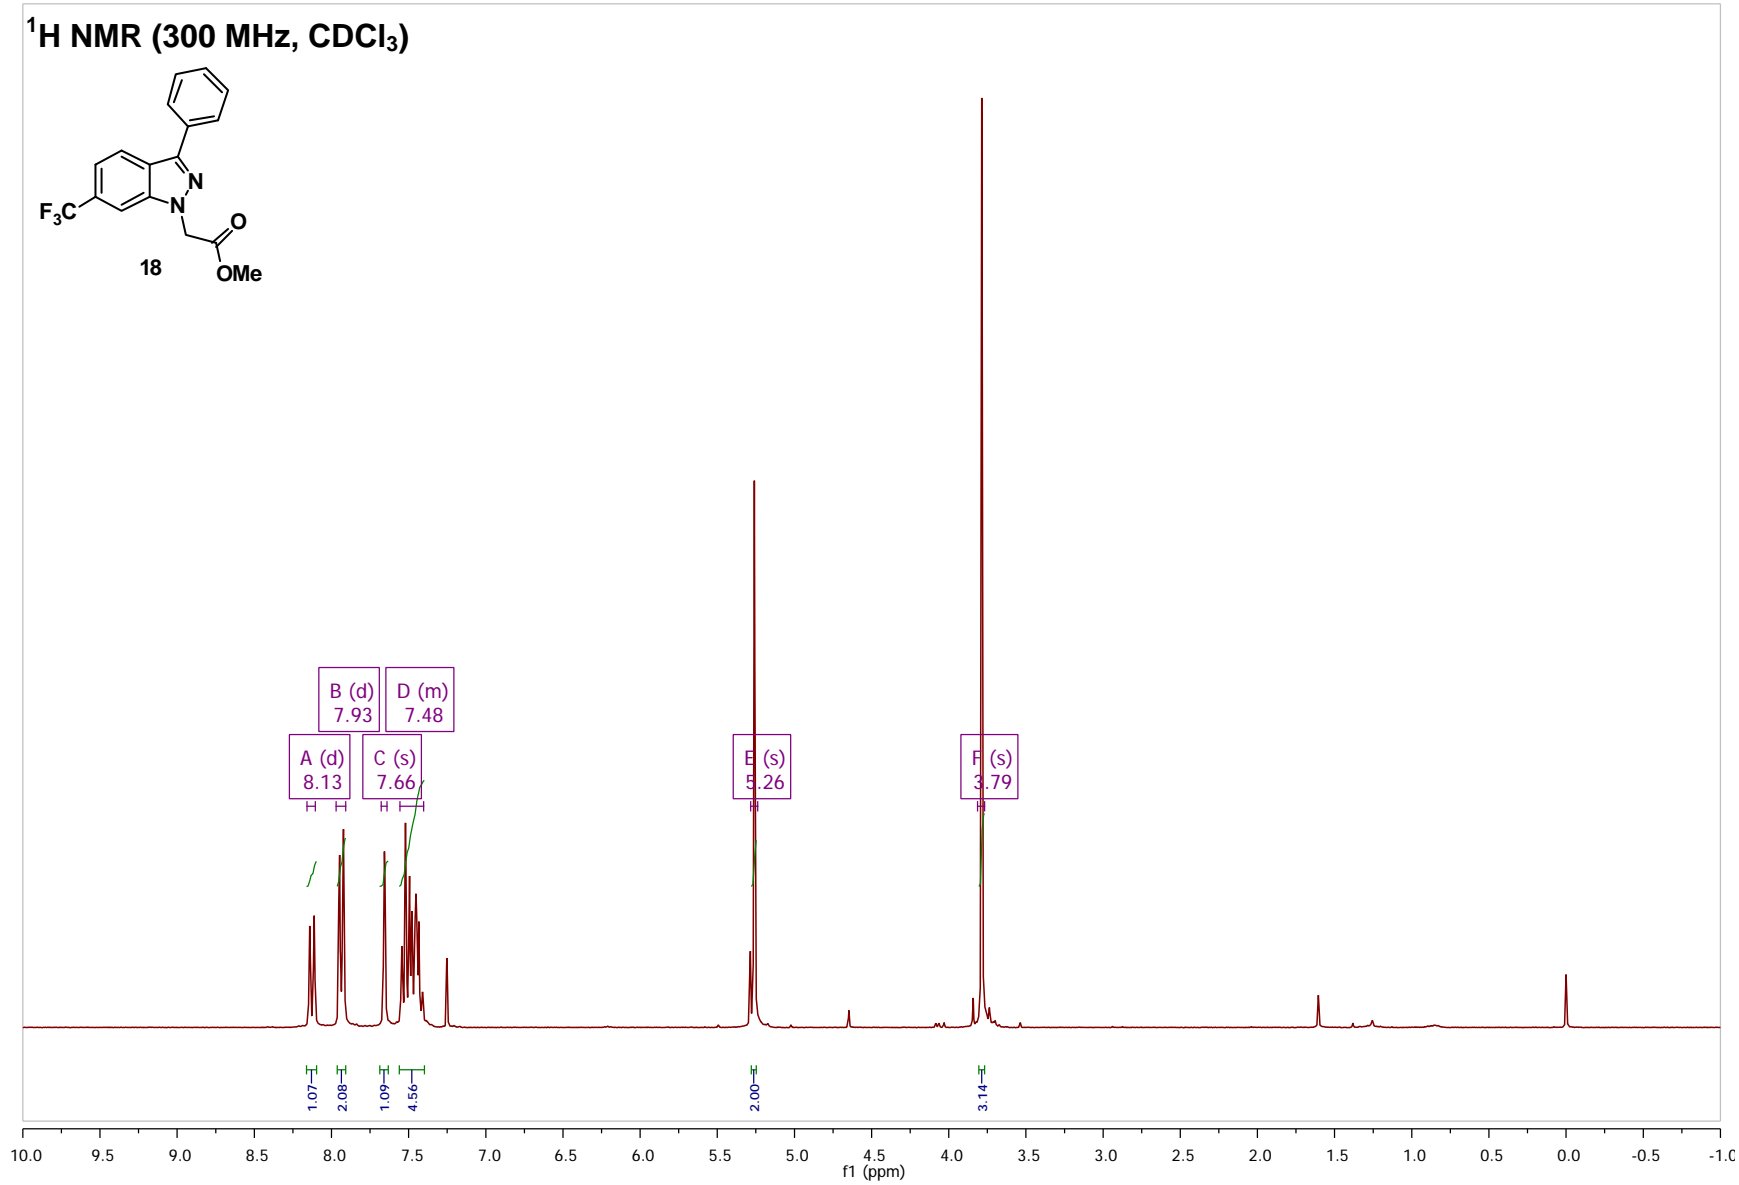

<sup>13</sup>C NMR (75 MHz, CDCl<sub>3</sub>)

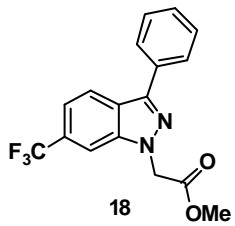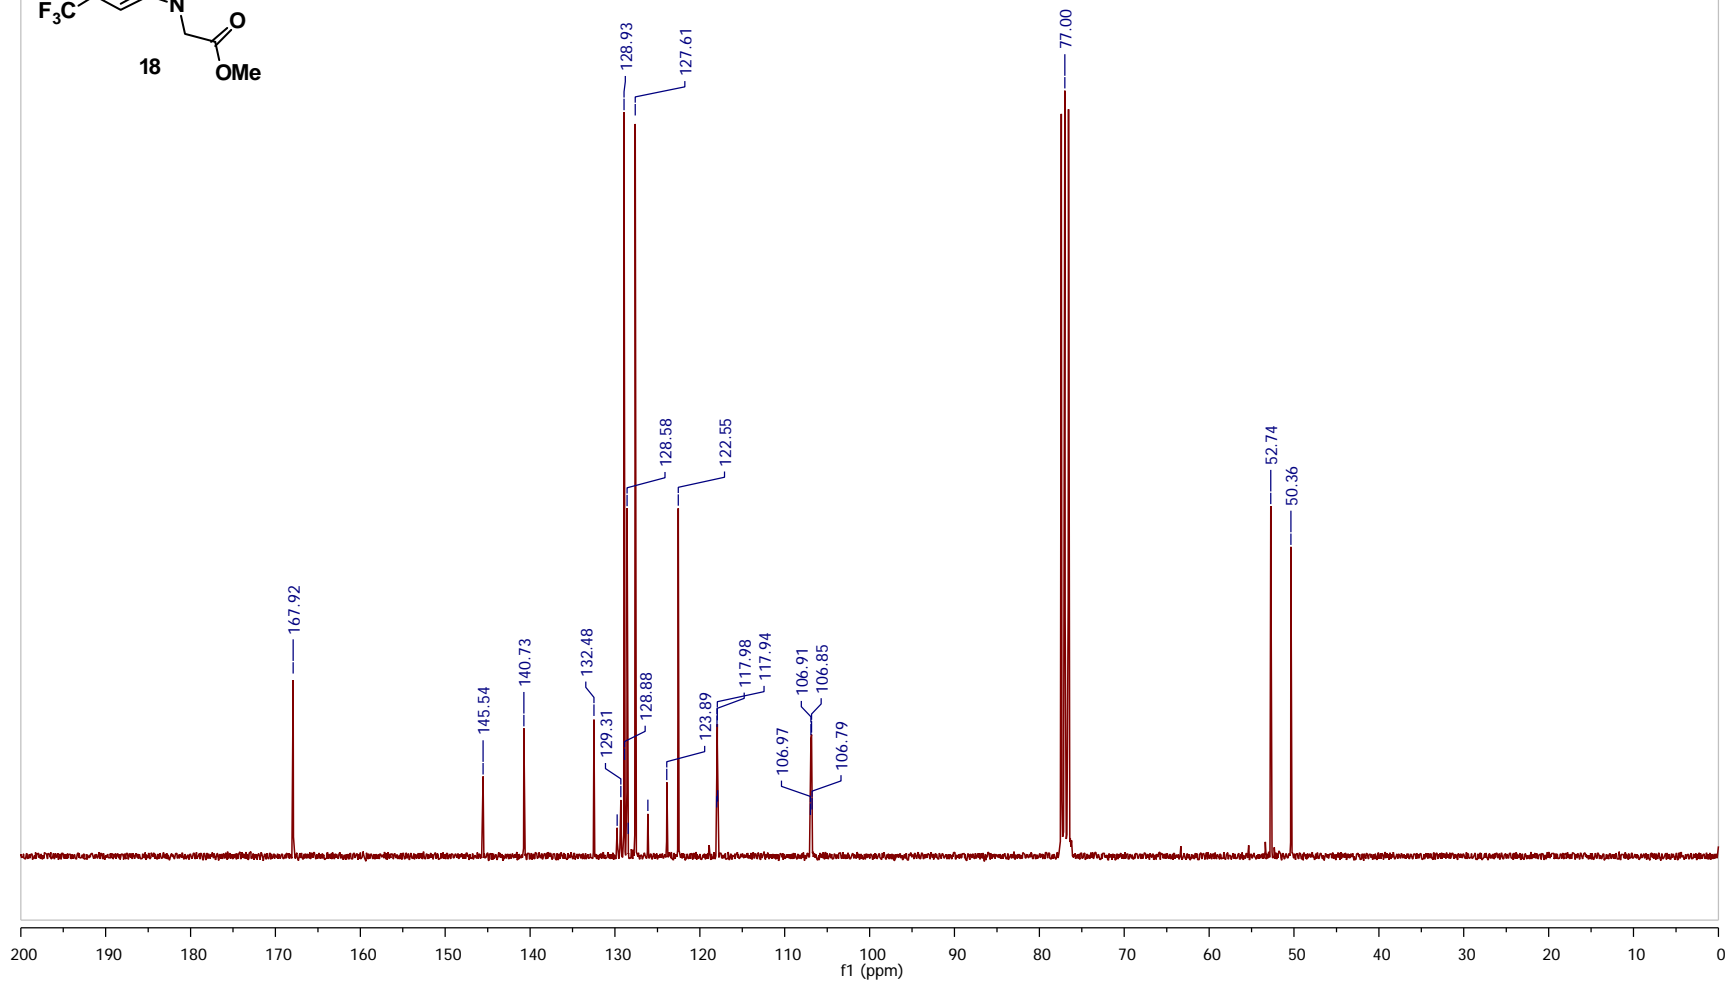

**<sup>1</sup>H NMR (300 MHz, CDCl<sub>3</sub>)**

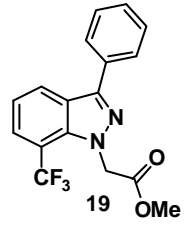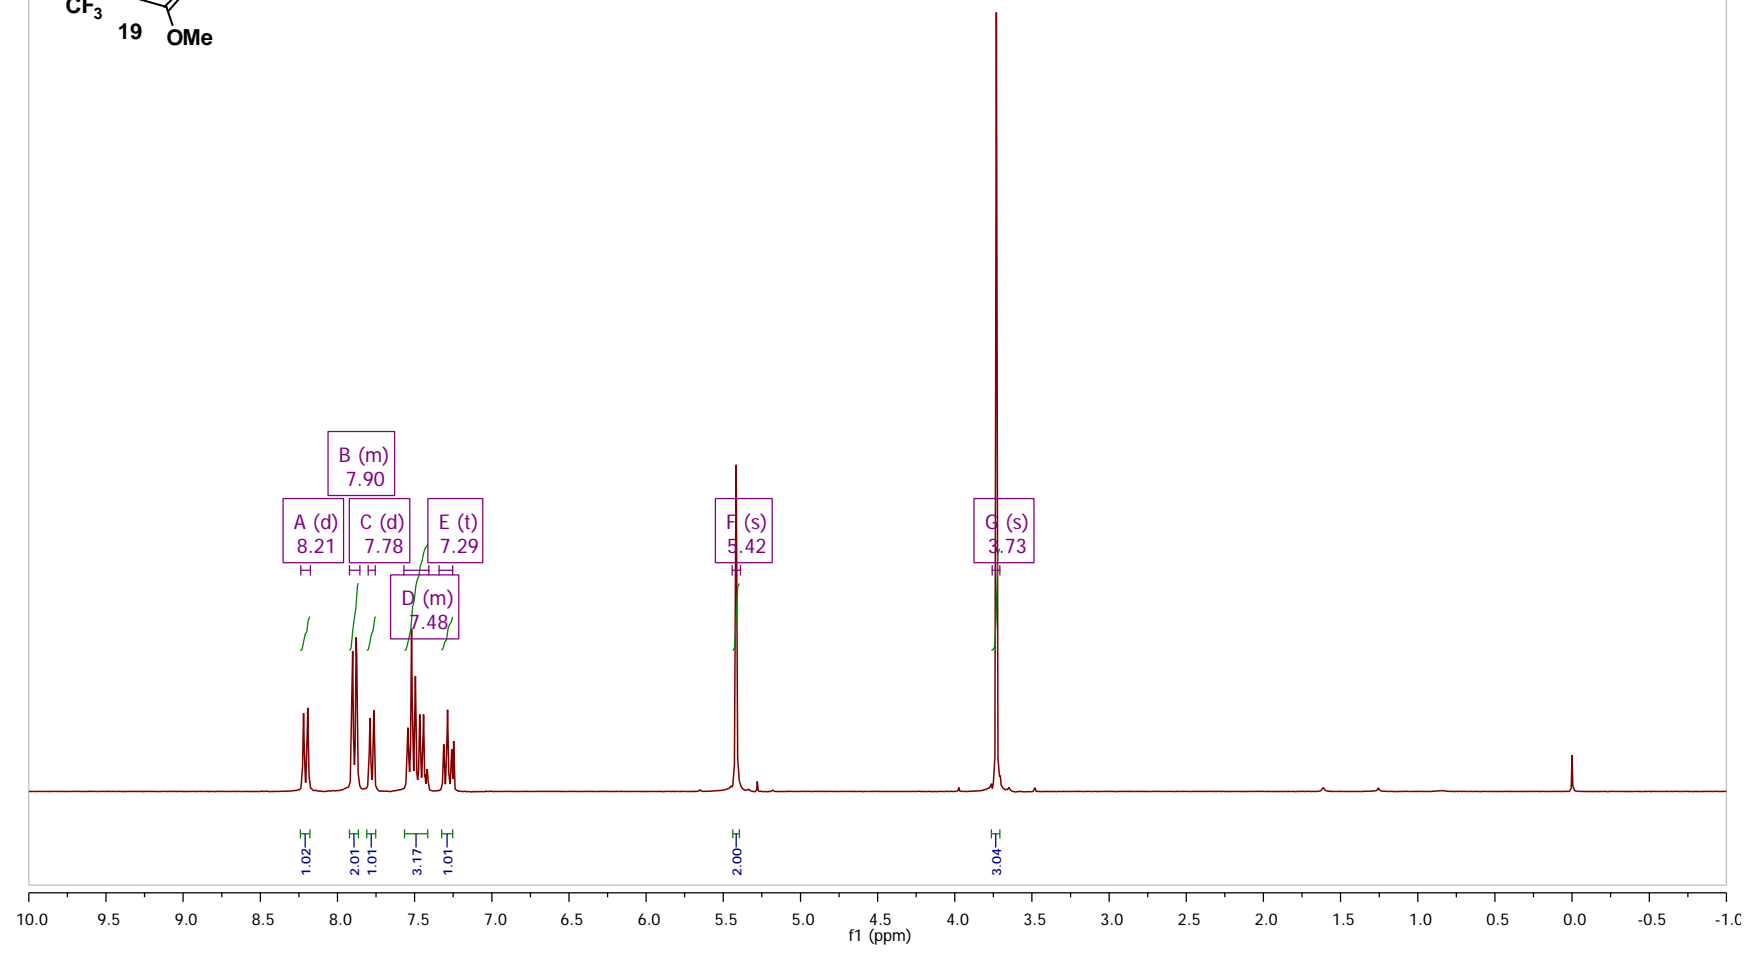

<sup>13</sup>C NMR (75 MHz, CDCl<sub>3</sub>)

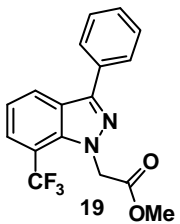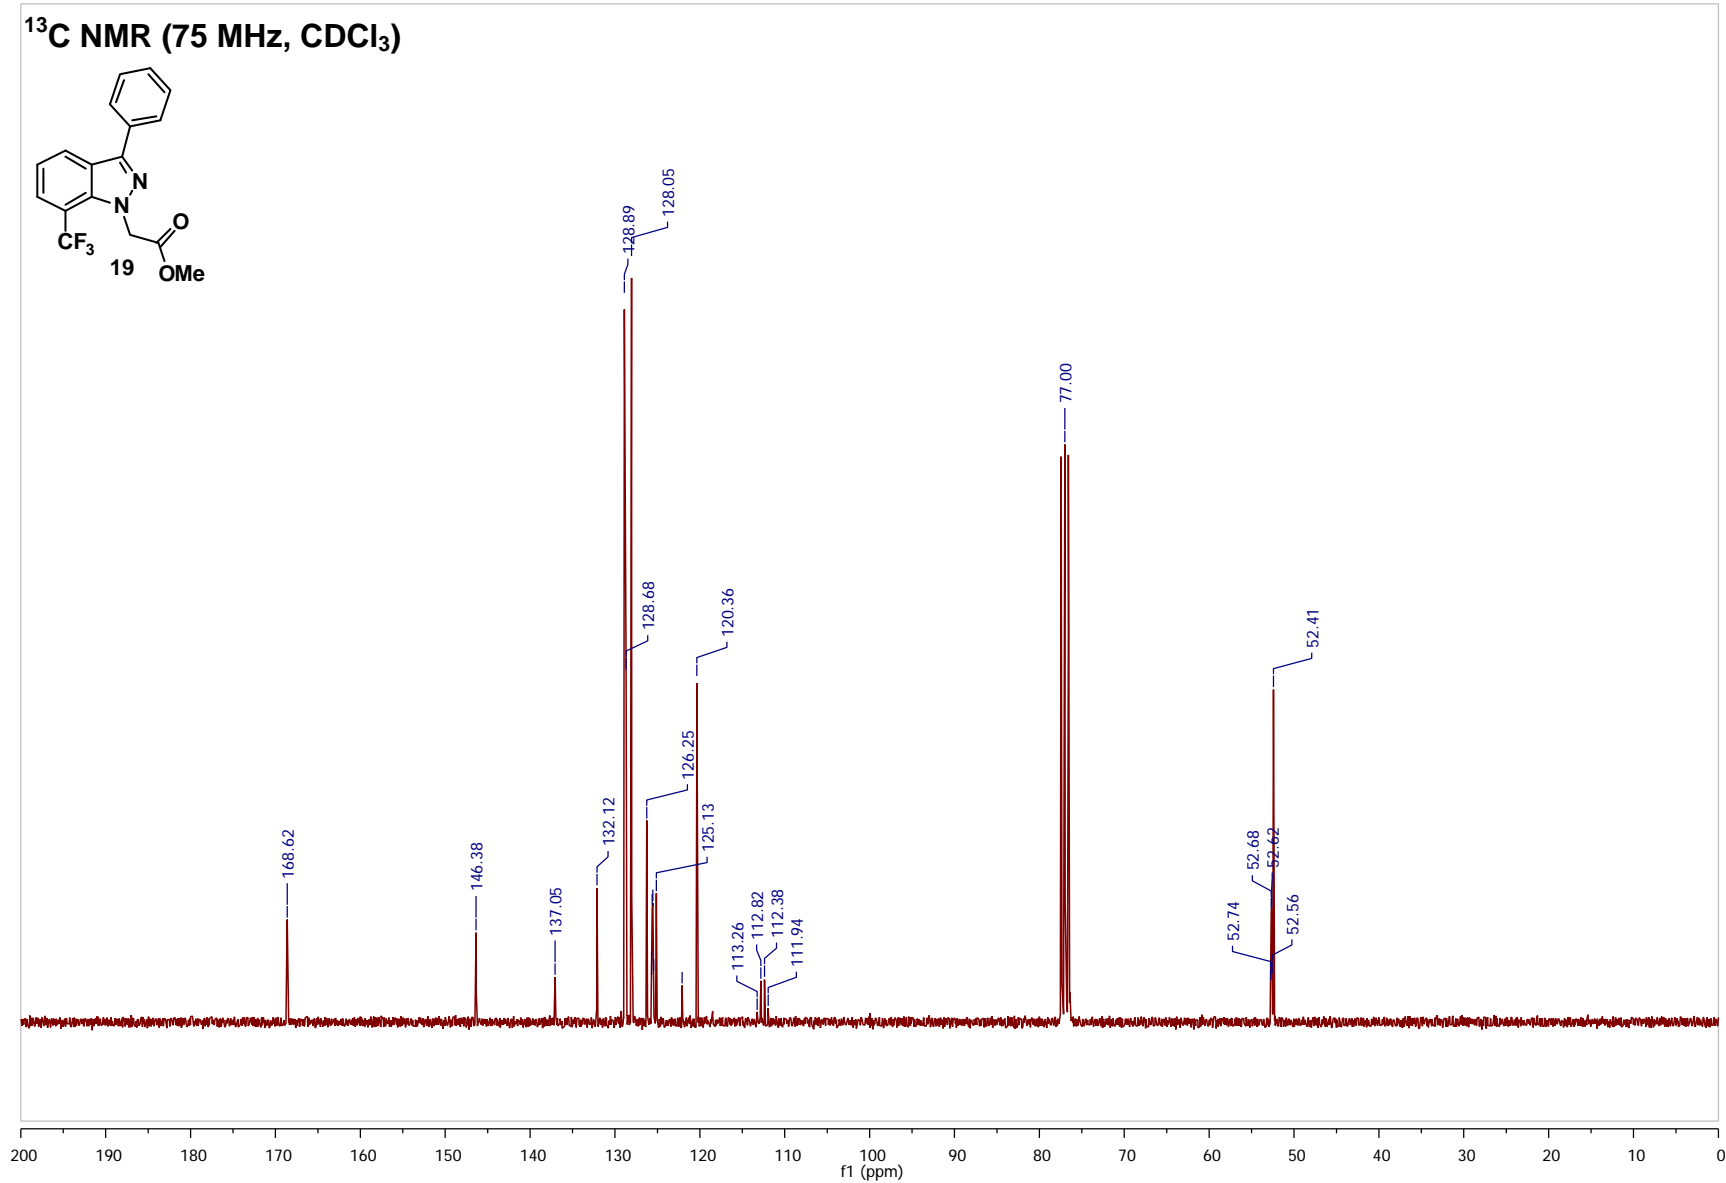



<sup>1</sup>H NMR (300 MHz, CDCl<sub>3</sub>)

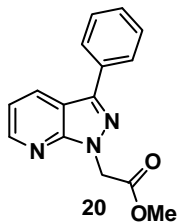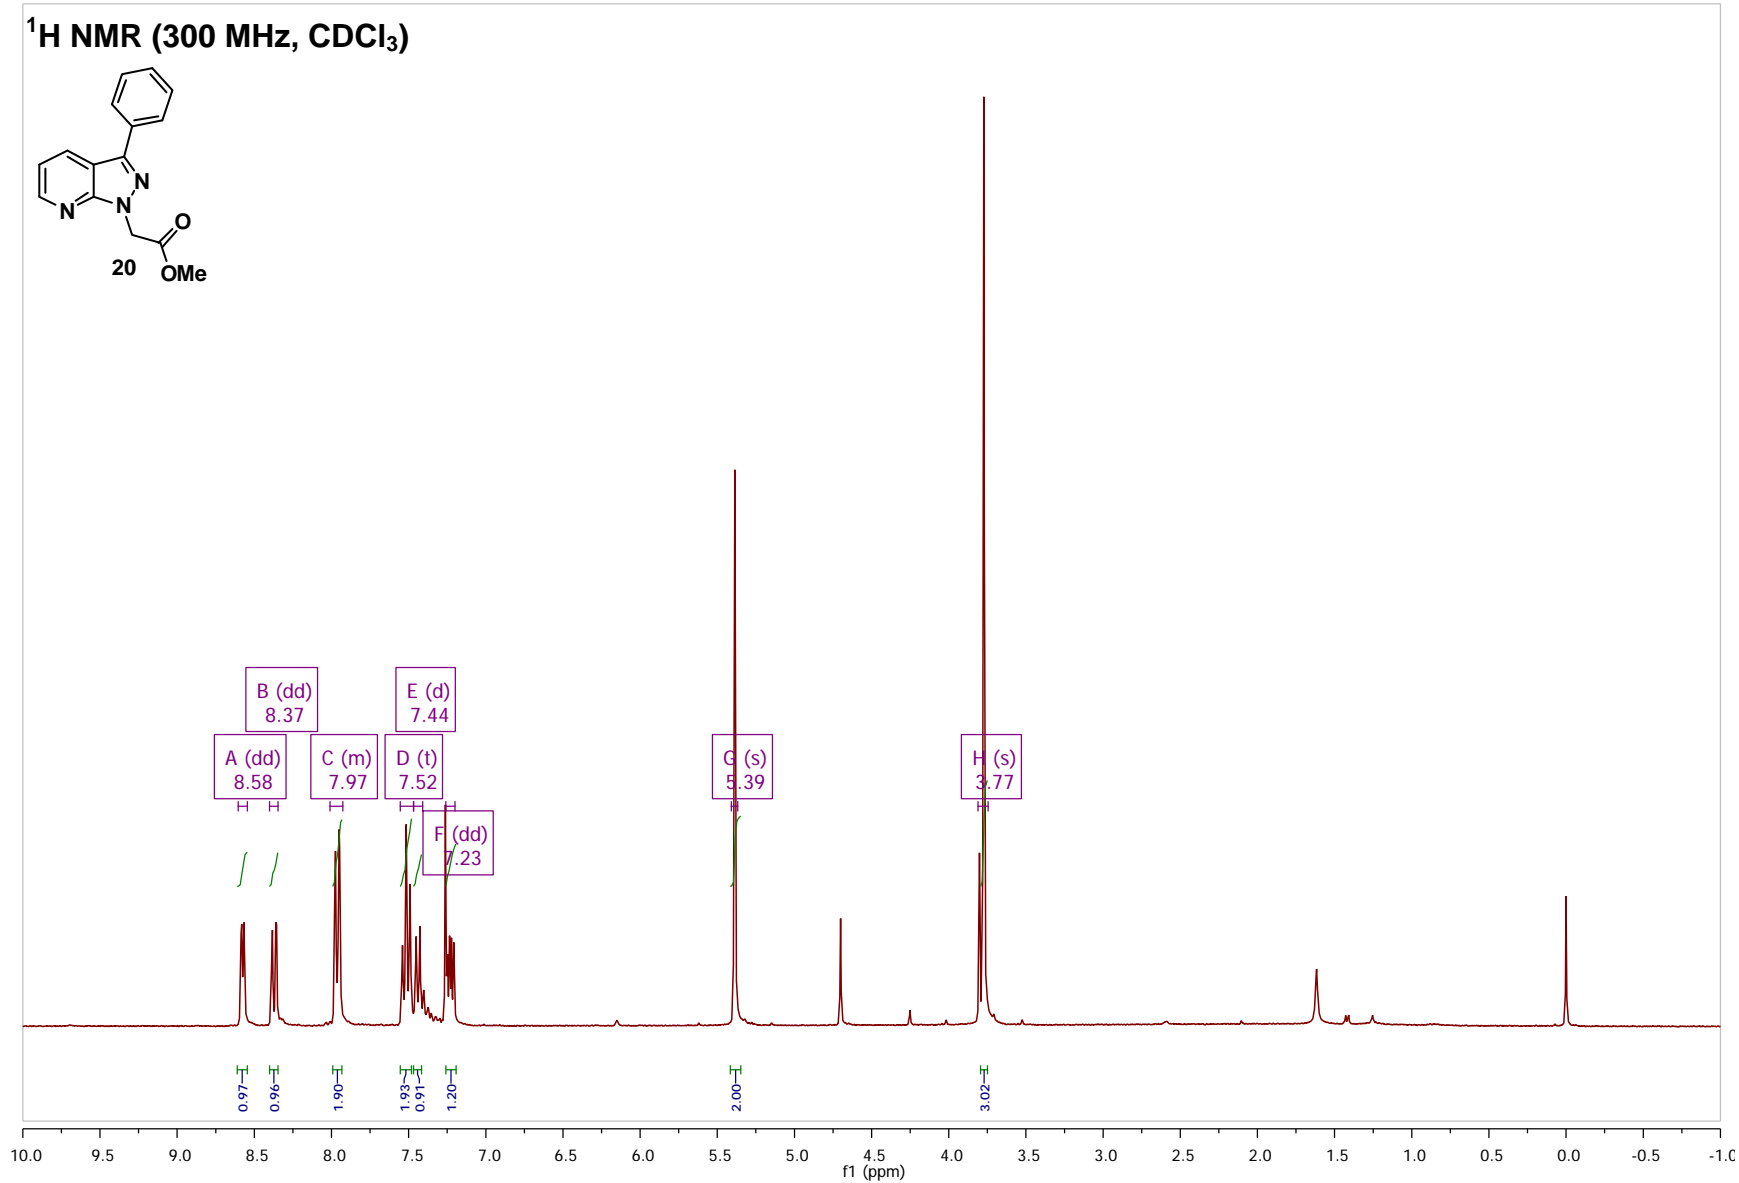

<sup>1</sup>H NMR (300 MHz, CDCl<sub>3</sub>)

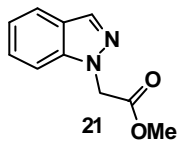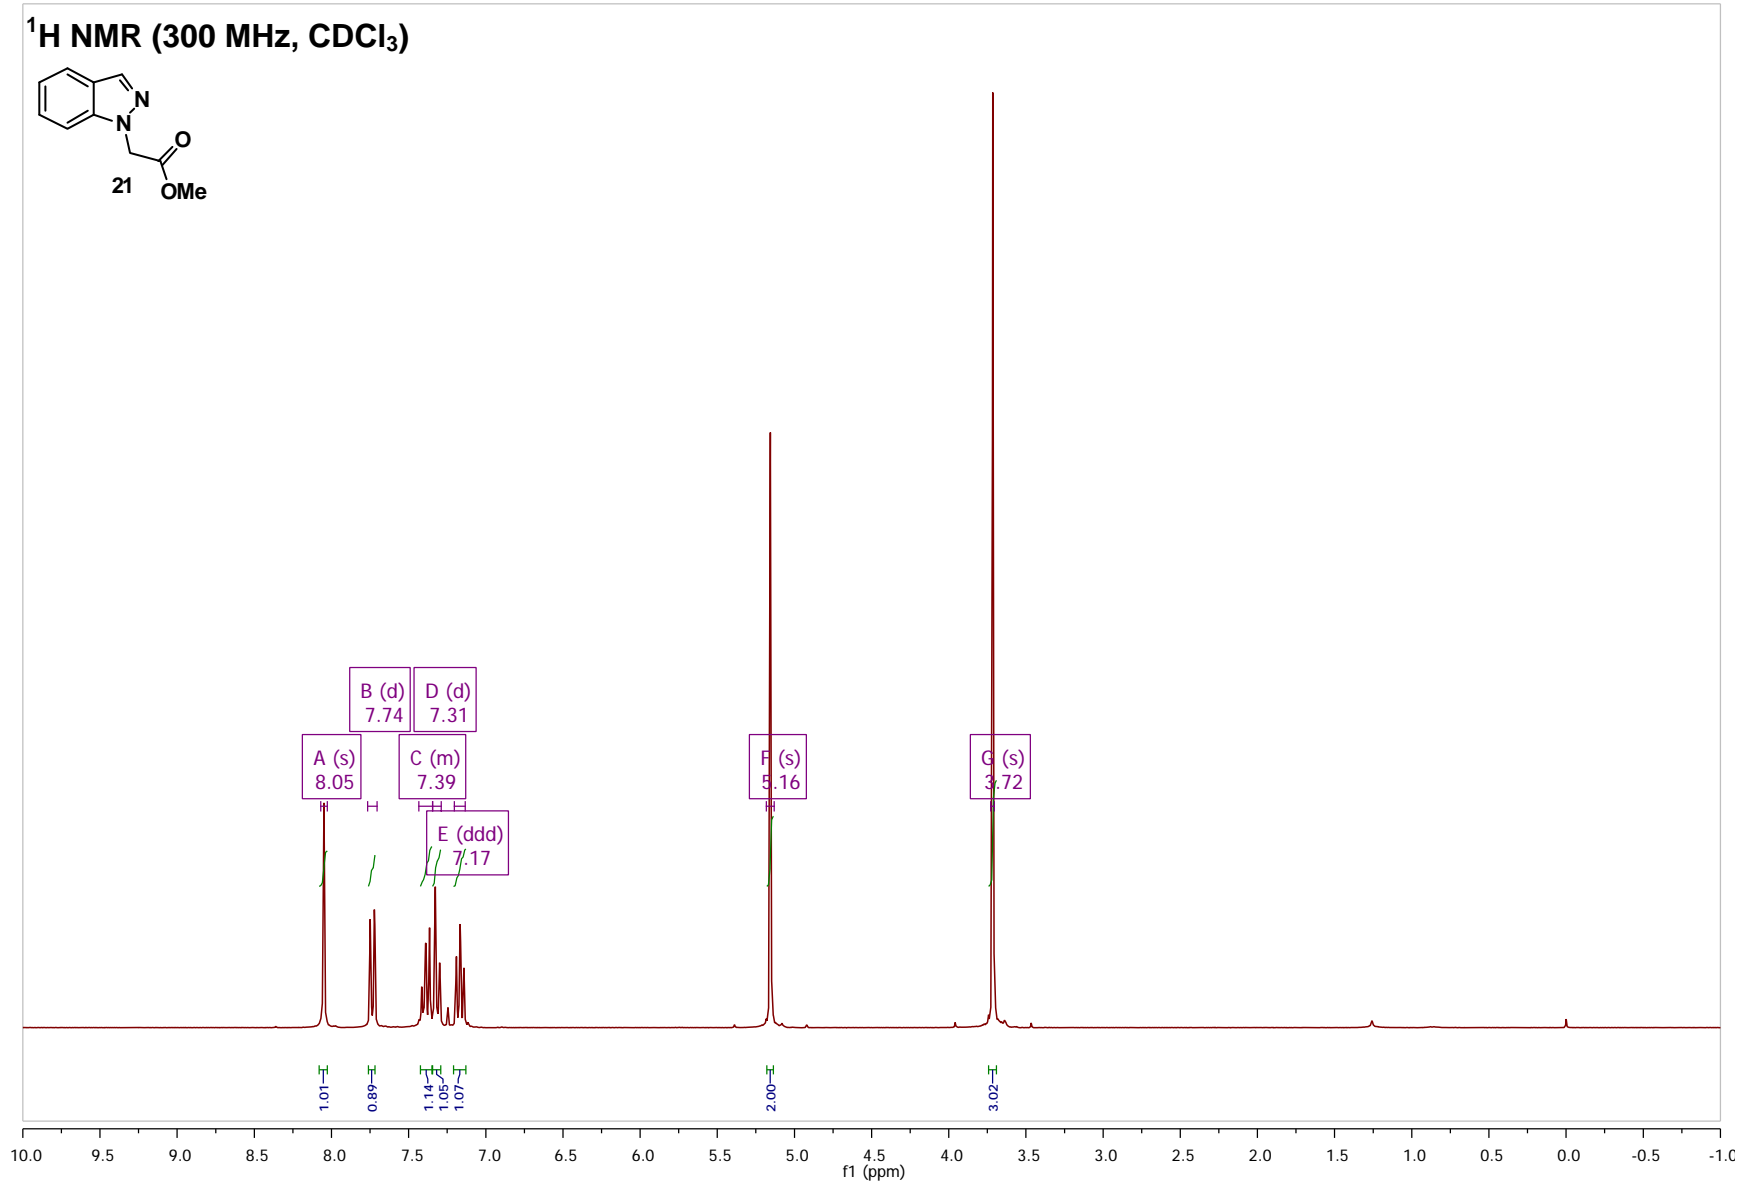

<sup>13</sup>C NMR (75 MHz, CDCl<sub>3</sub>)

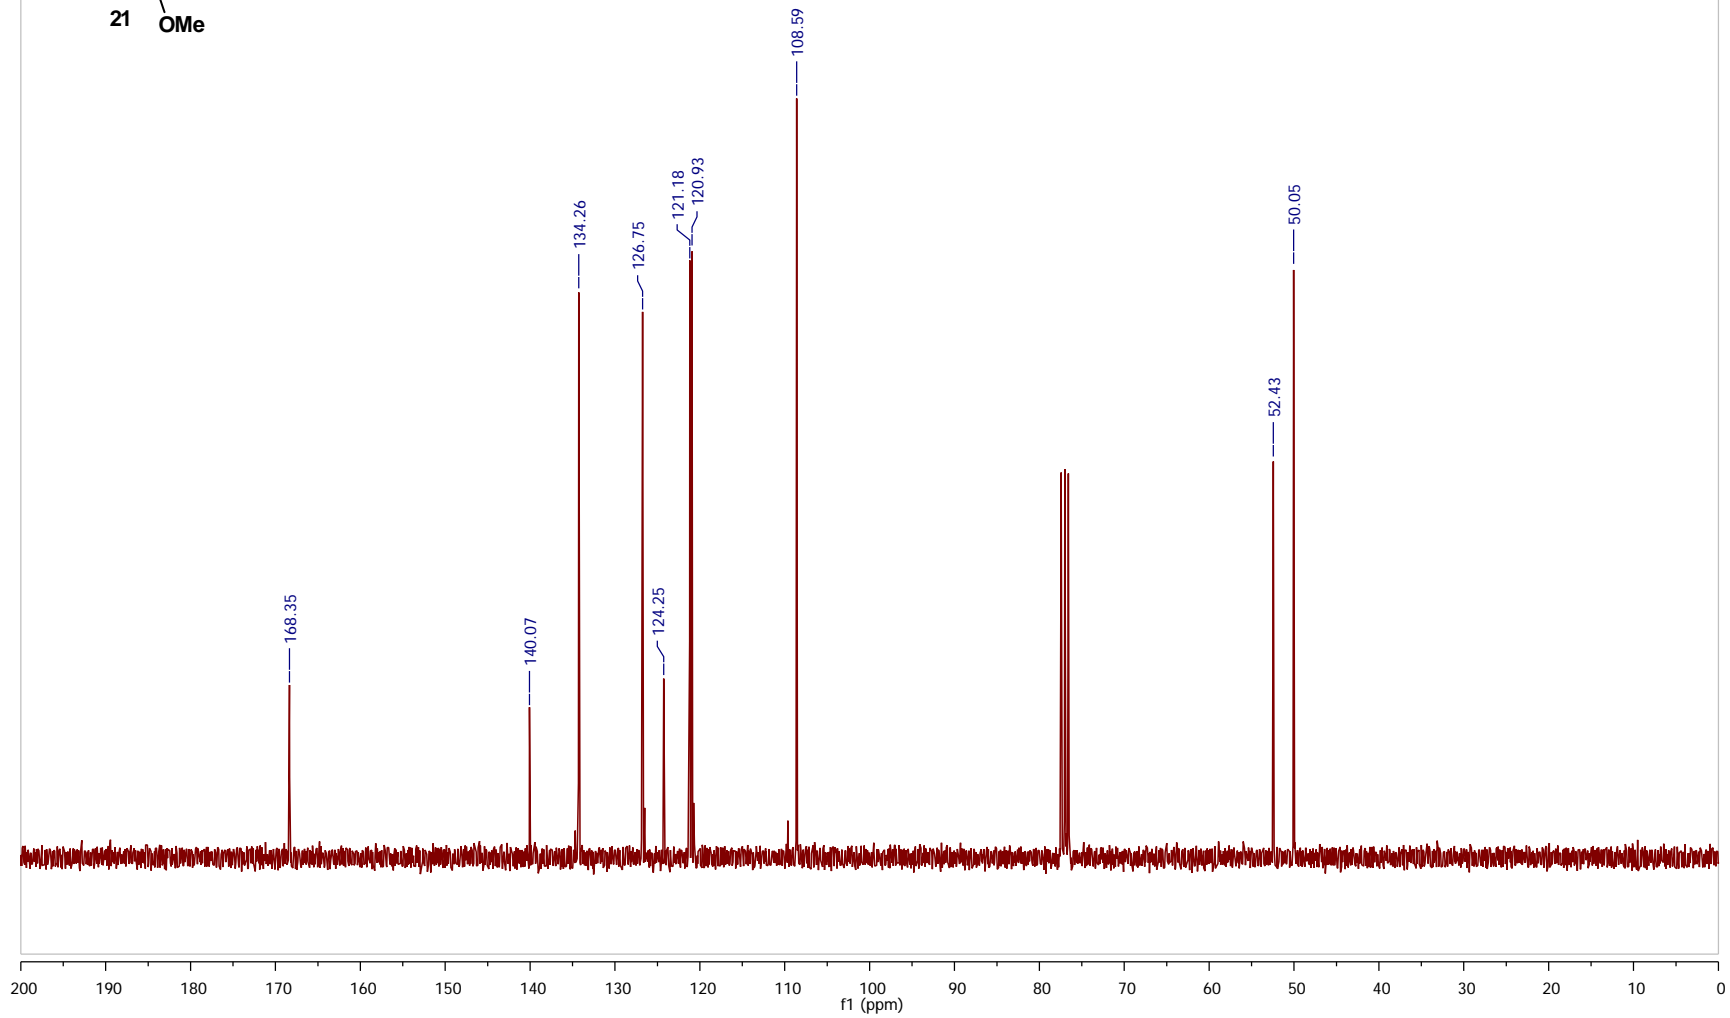

<sup>1</sup>H NMR (300 MHz, CDCl<sub>3</sub>)

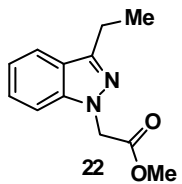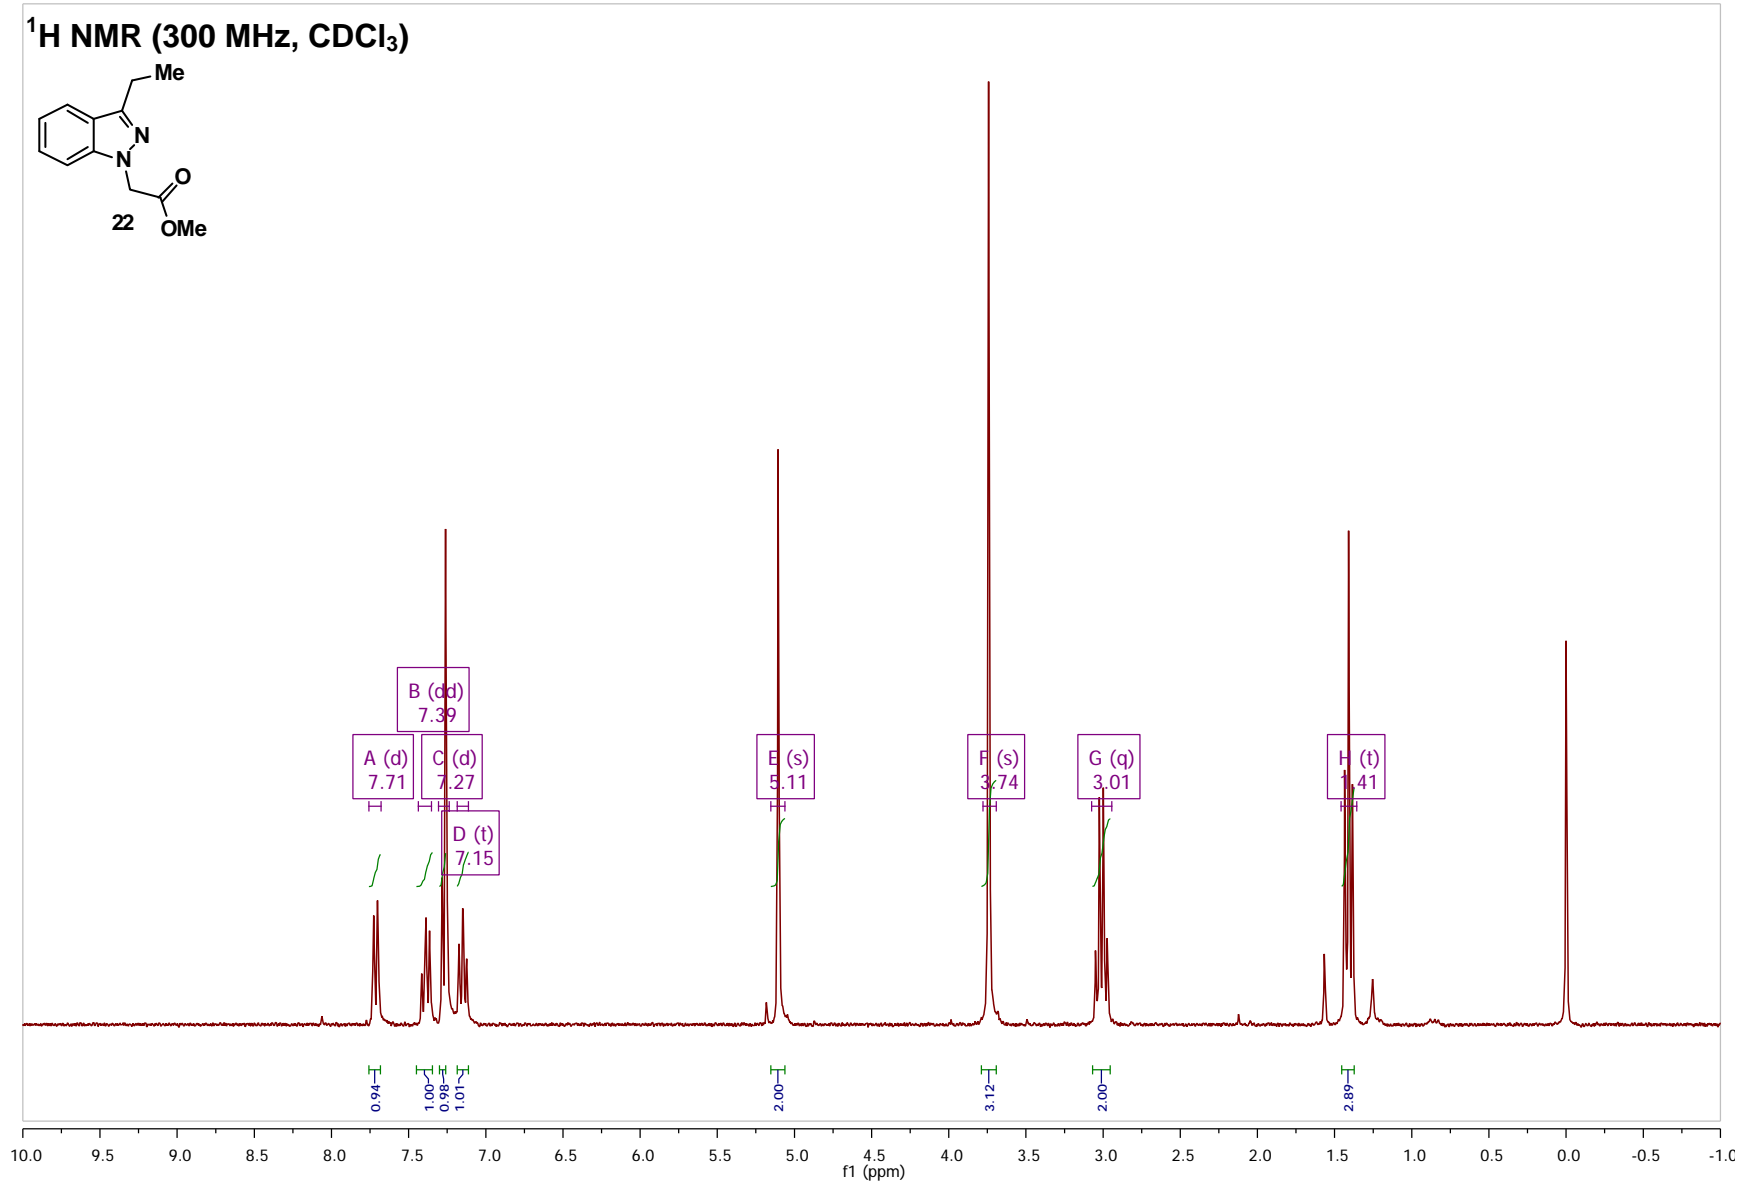

<sup>13</sup>C NMR (75 MHz, CDCl<sub>3</sub>)

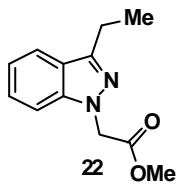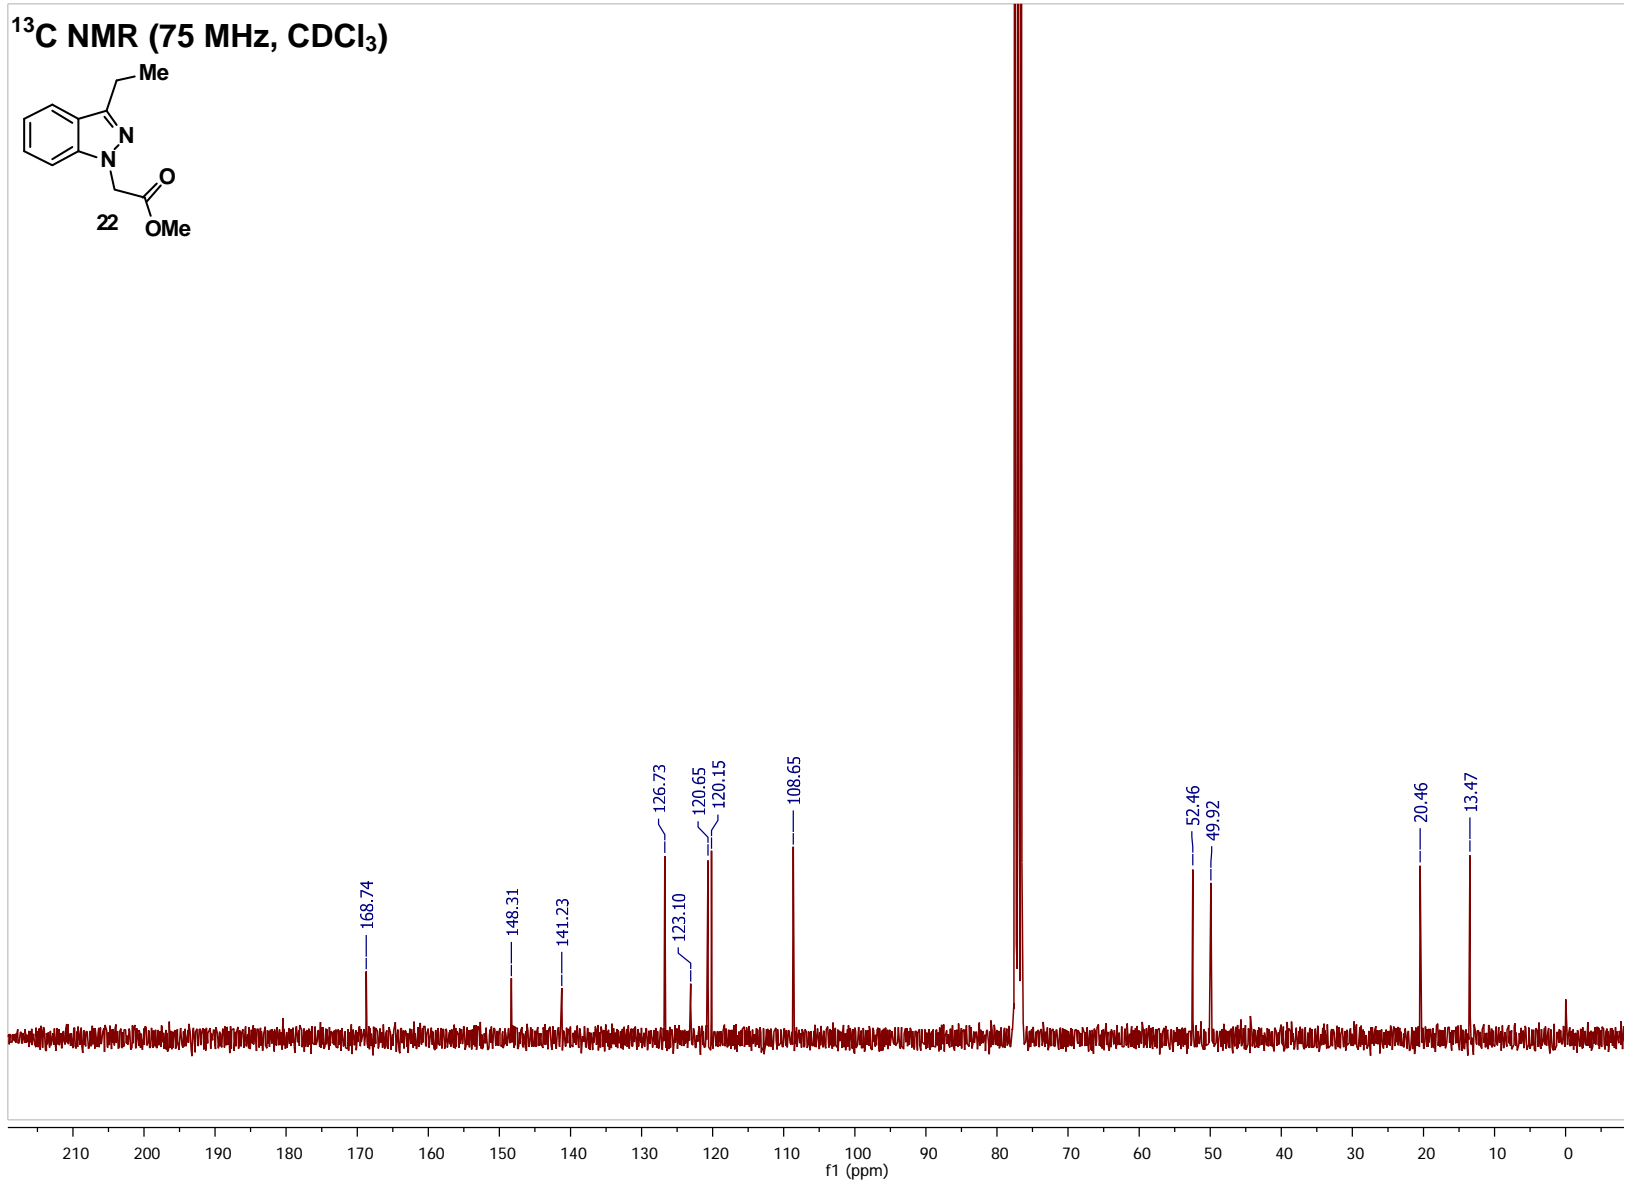

<sup>1</sup>H NMR (300 MHz, CDCl<sub>3</sub>)

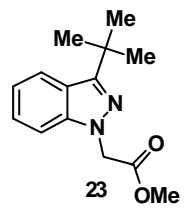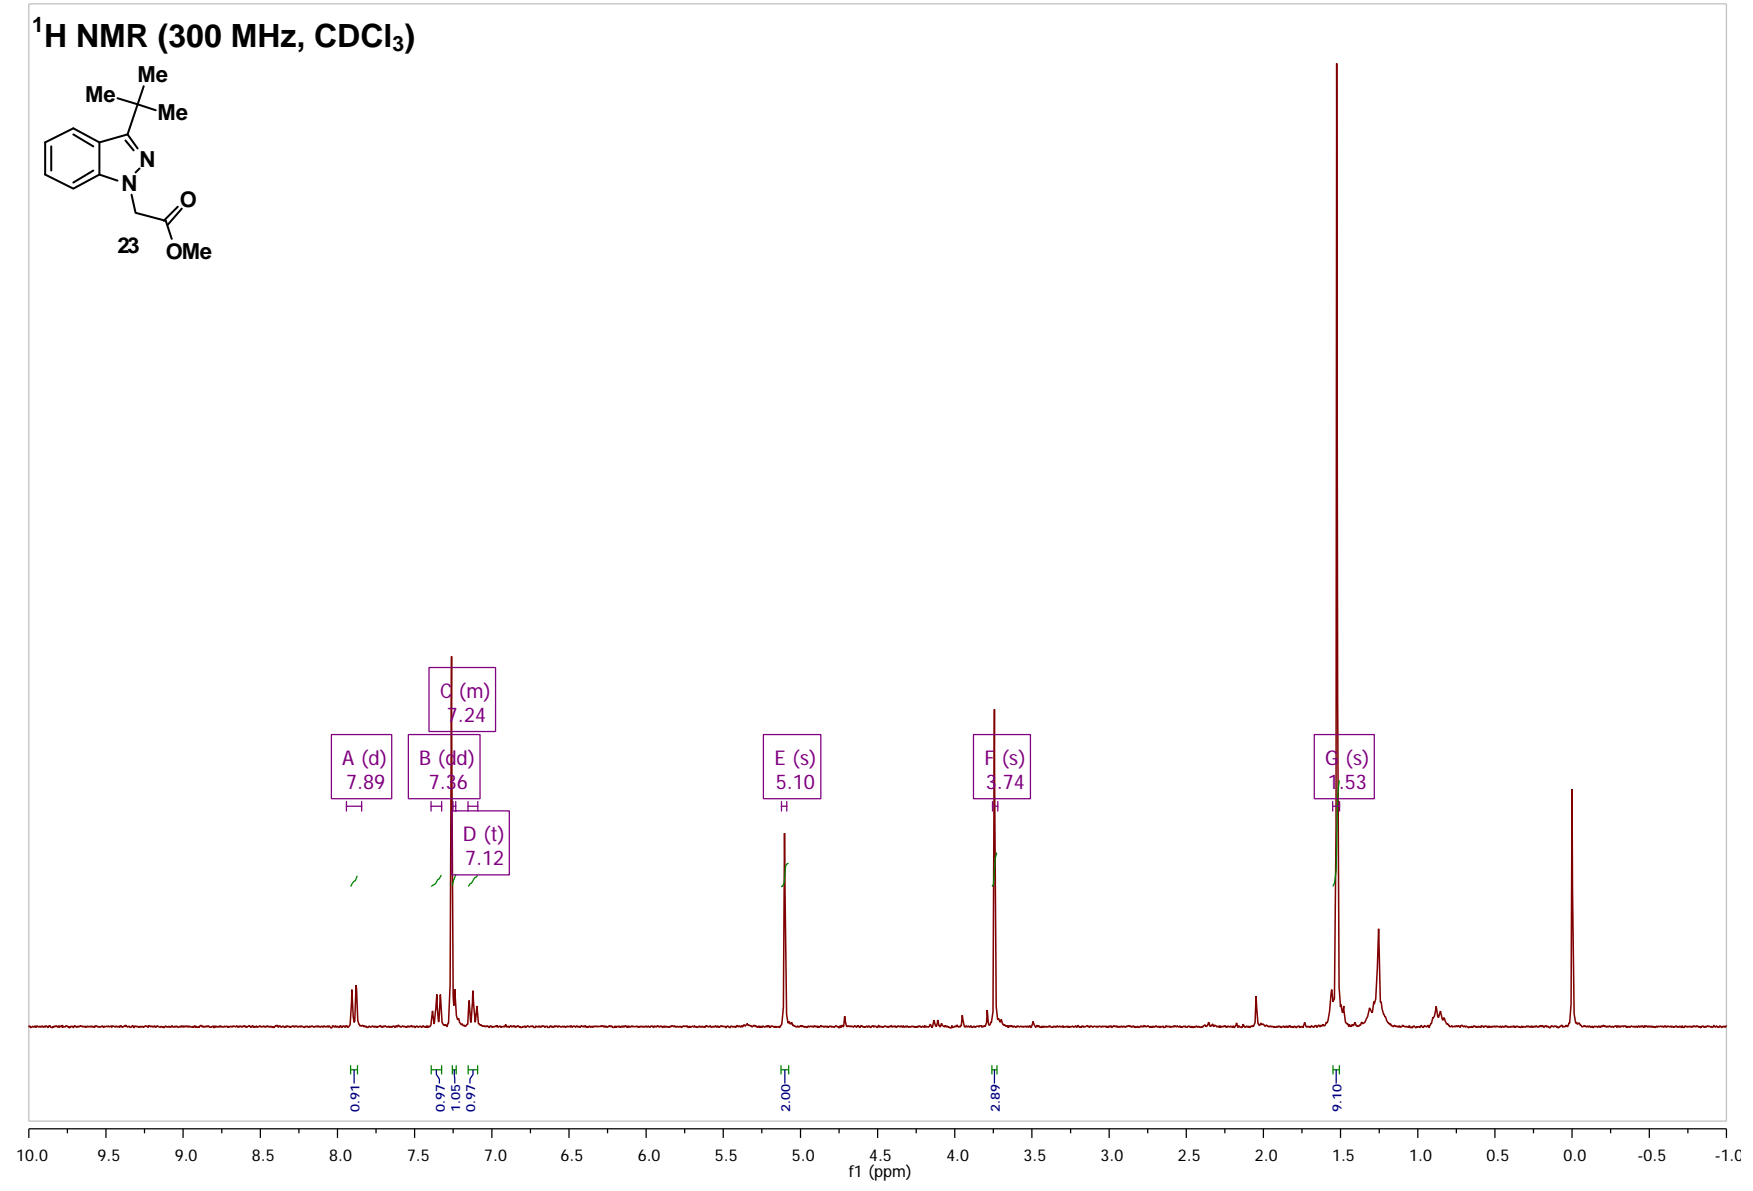

<sup>1</sup>H NMR (300 MHz, CDCl<sub>3</sub>)

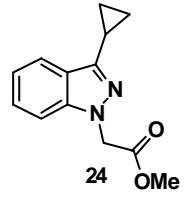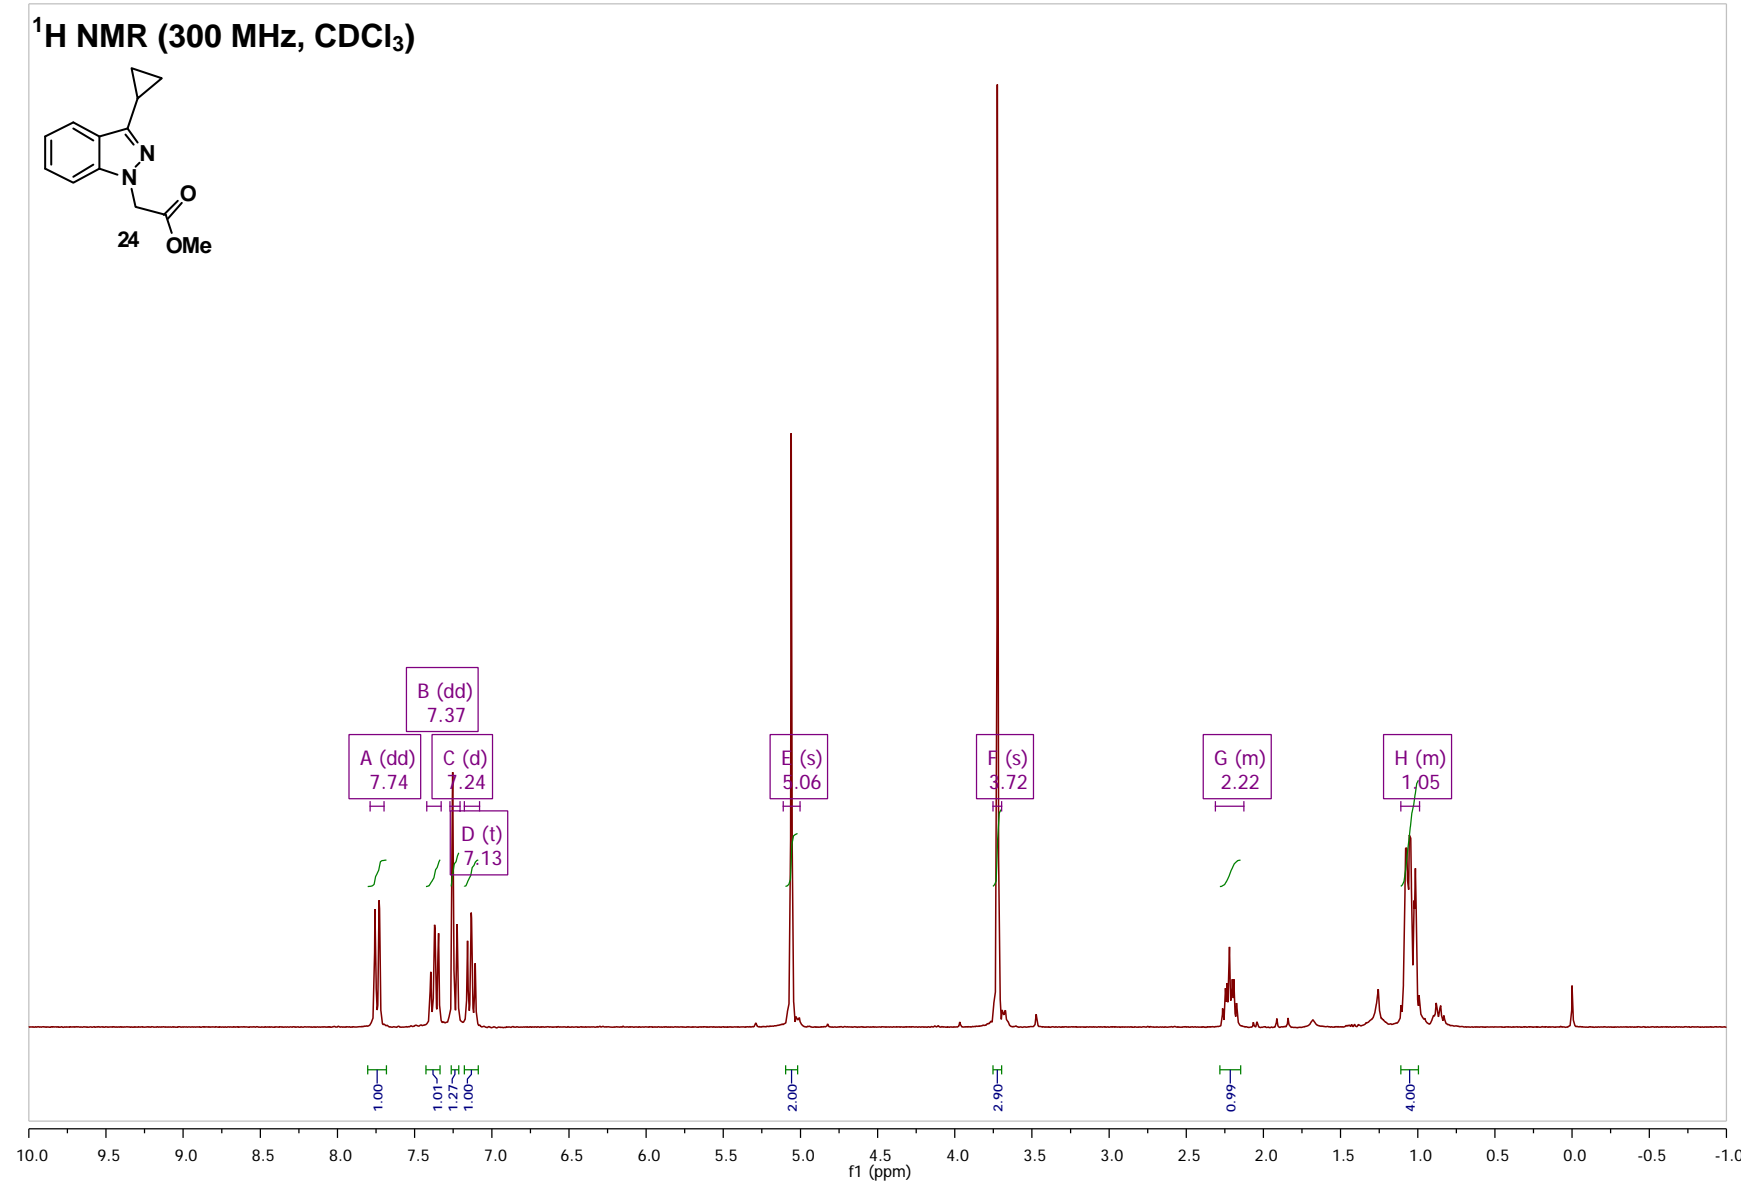

<sup>13</sup>C NMR (75 MHz, CDCl<sub>3</sub>)

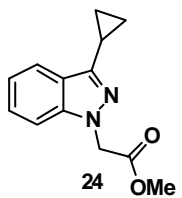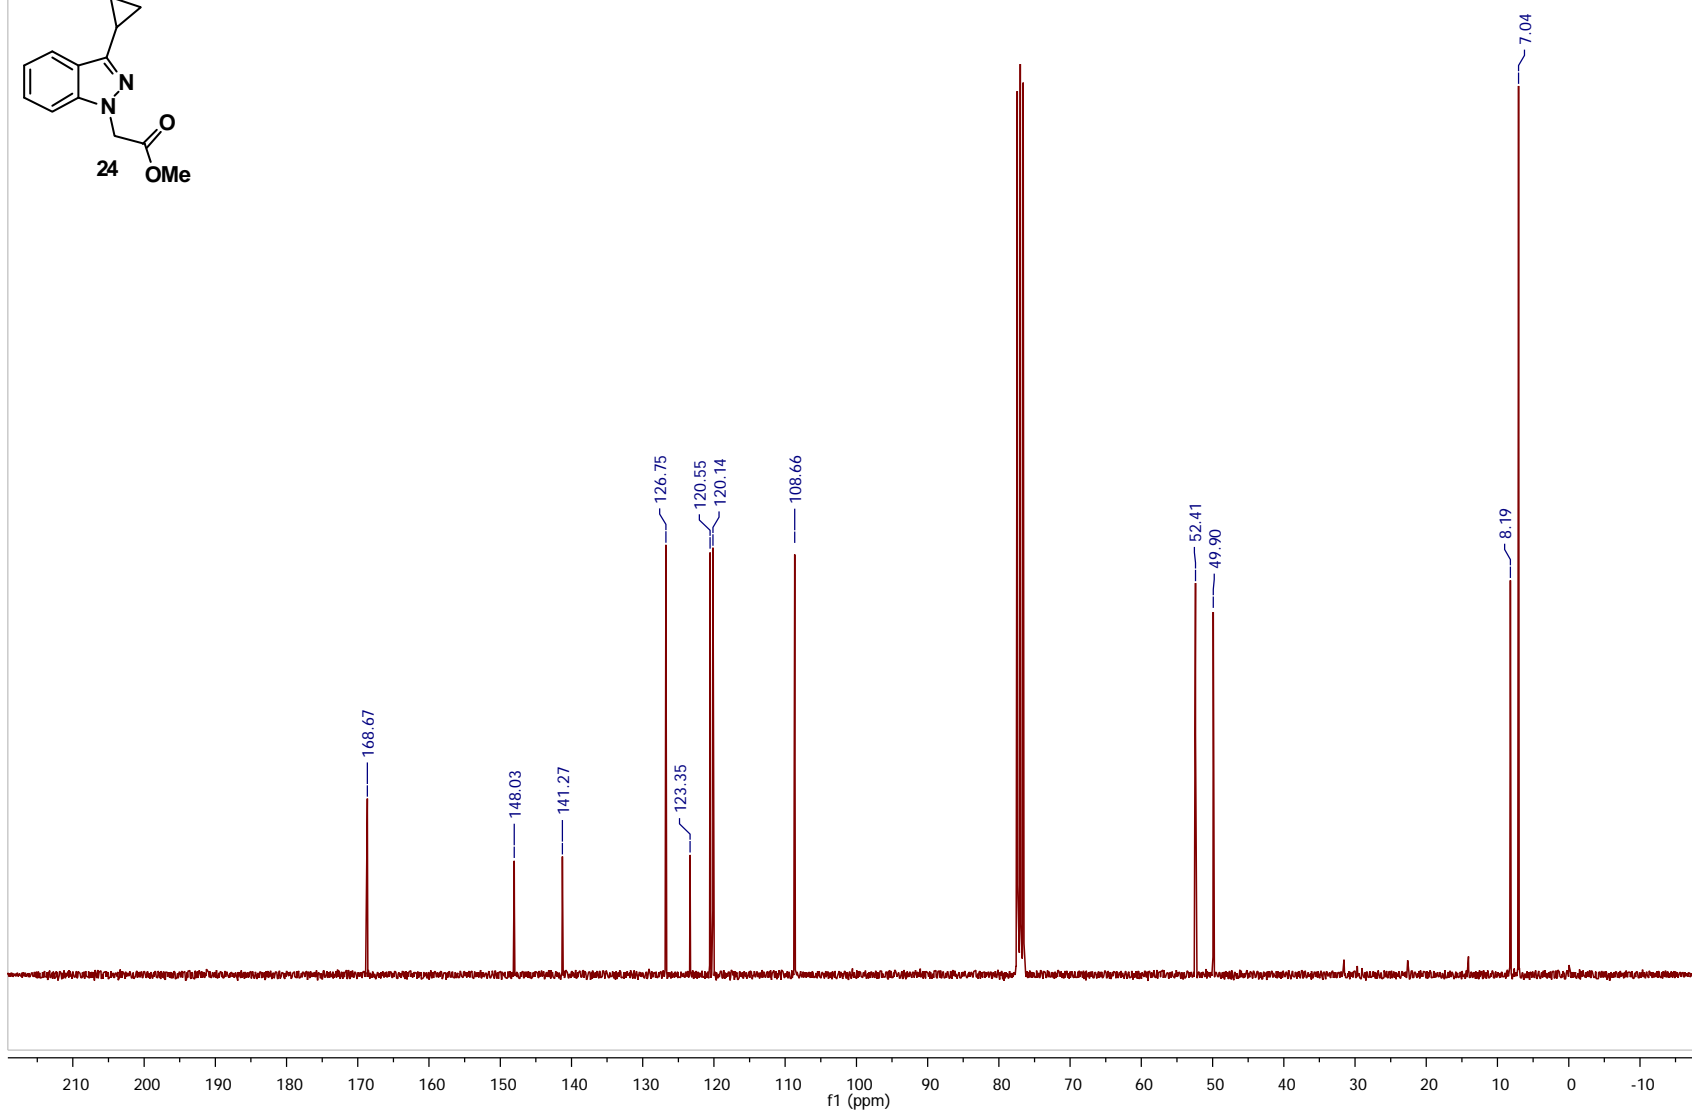



<sup>1</sup>H NMR (300 MHz, CDCl<sub>3</sub>)

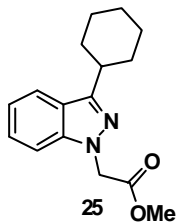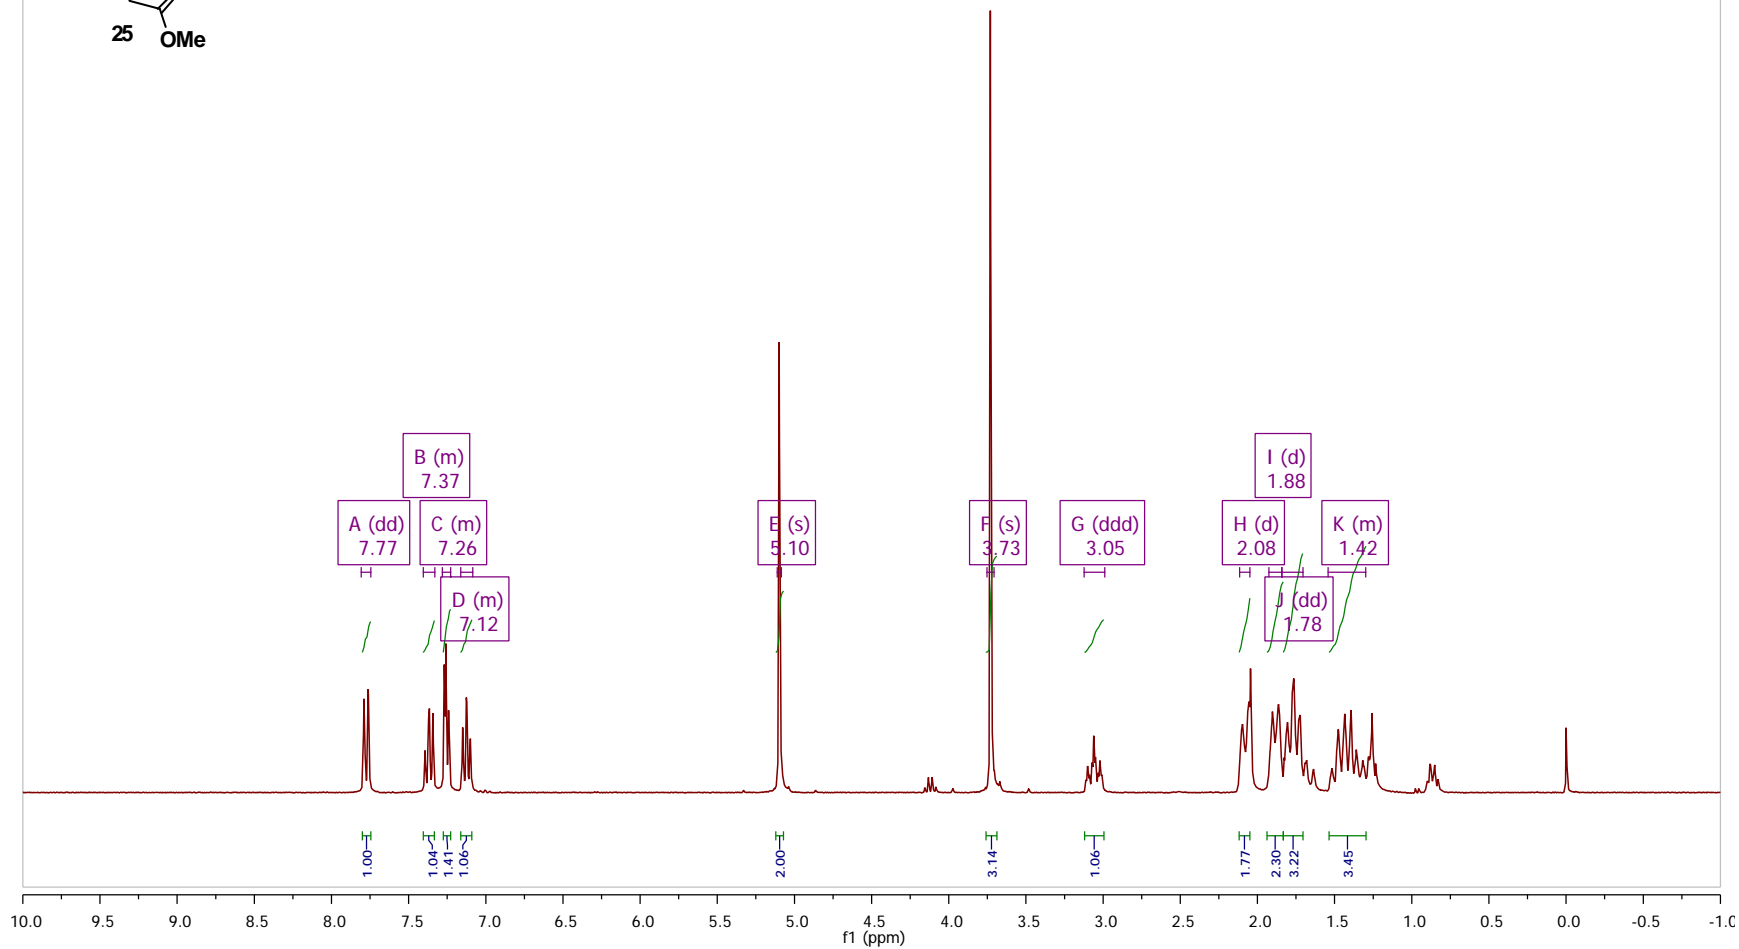

<sup>13</sup>C NMR (75 MHz, CDCl<sub>3</sub>)

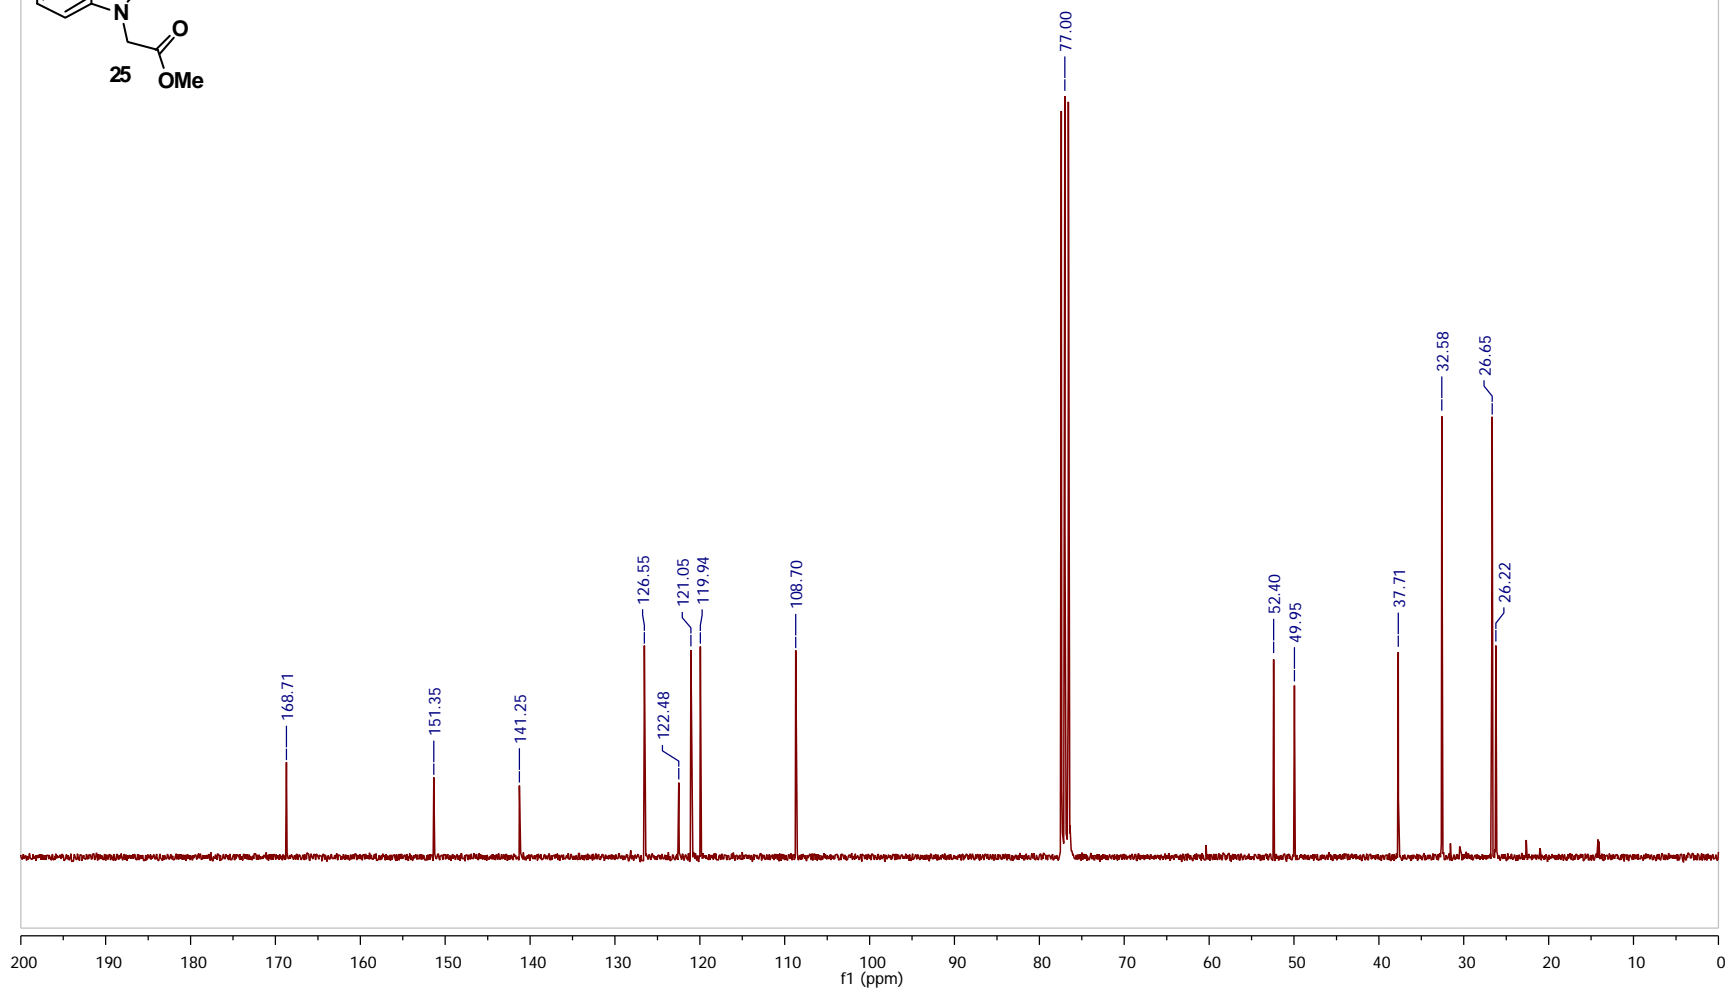

<sup>1</sup>H NMR (300 MHz, CDCl<sub>3</sub>)

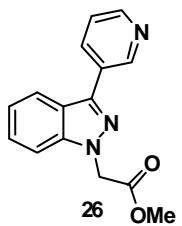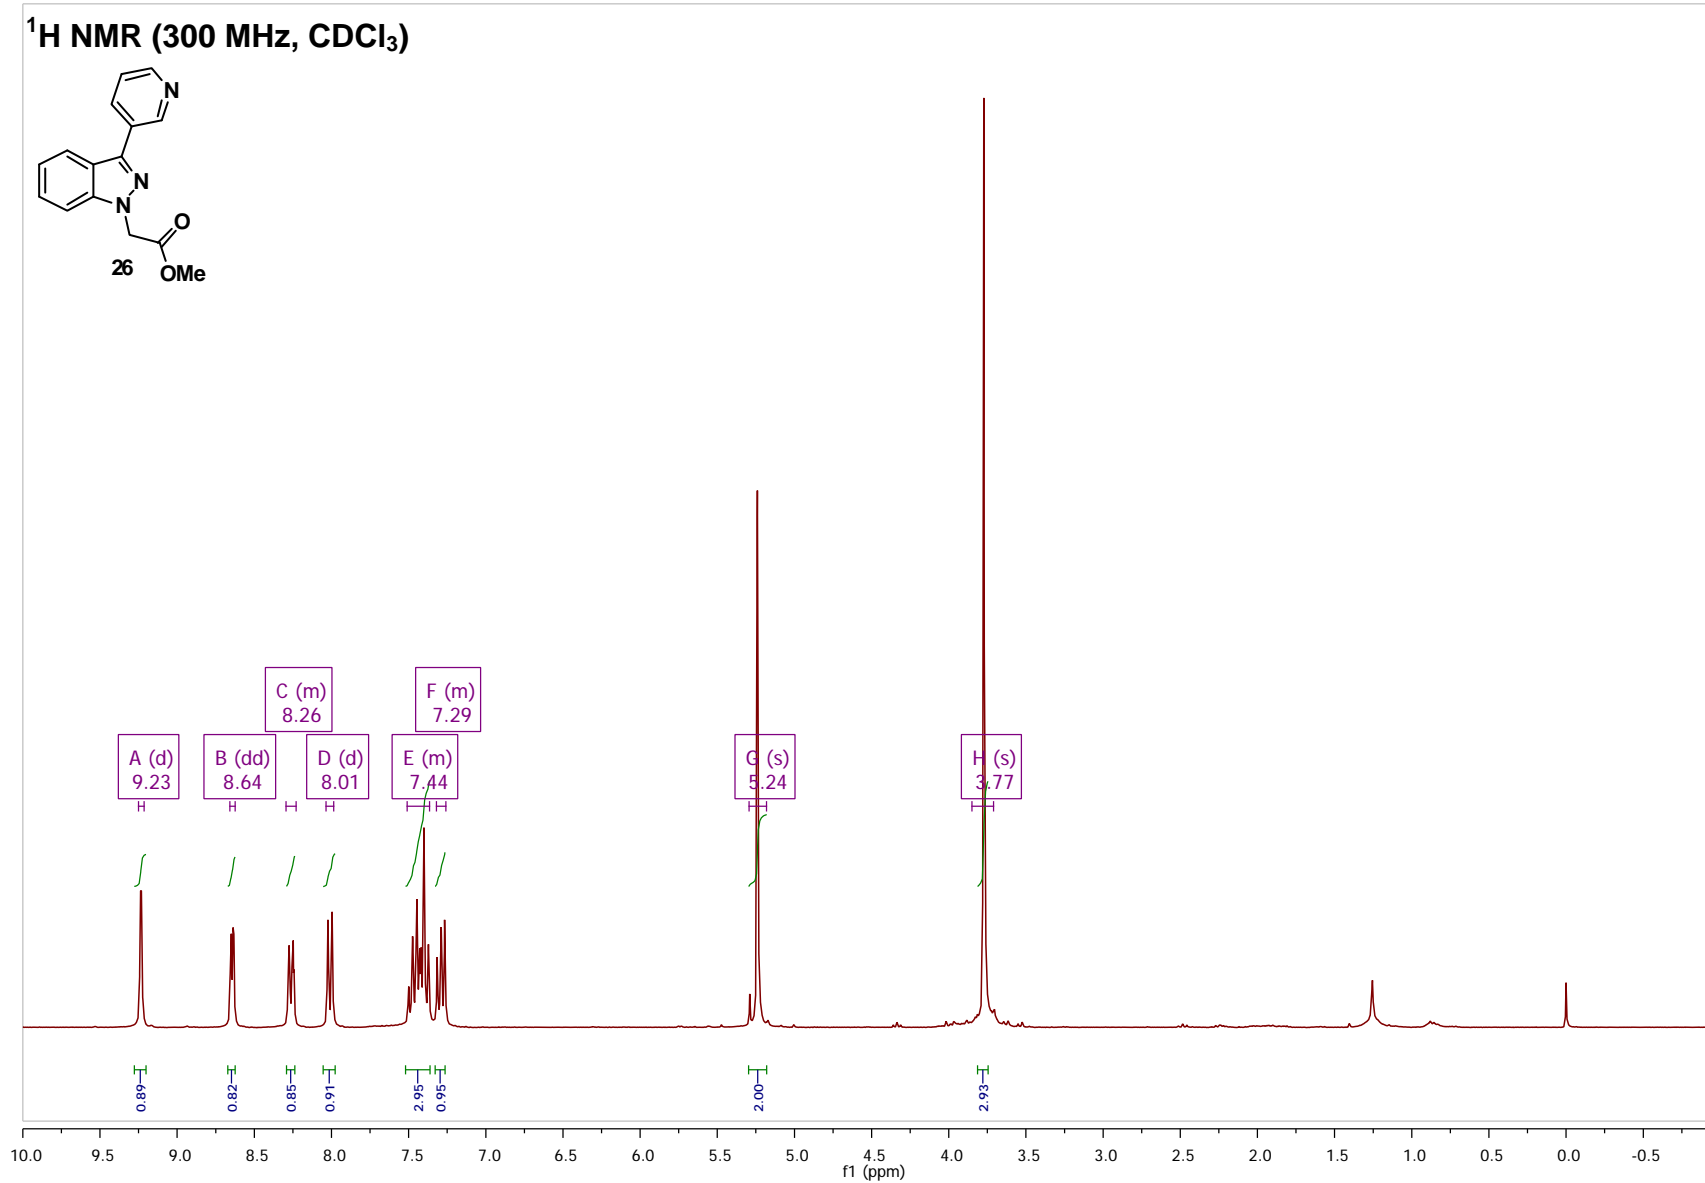

<sup>1</sup>H NMR (300 MHz, CDCl<sub>3</sub>)

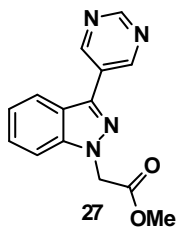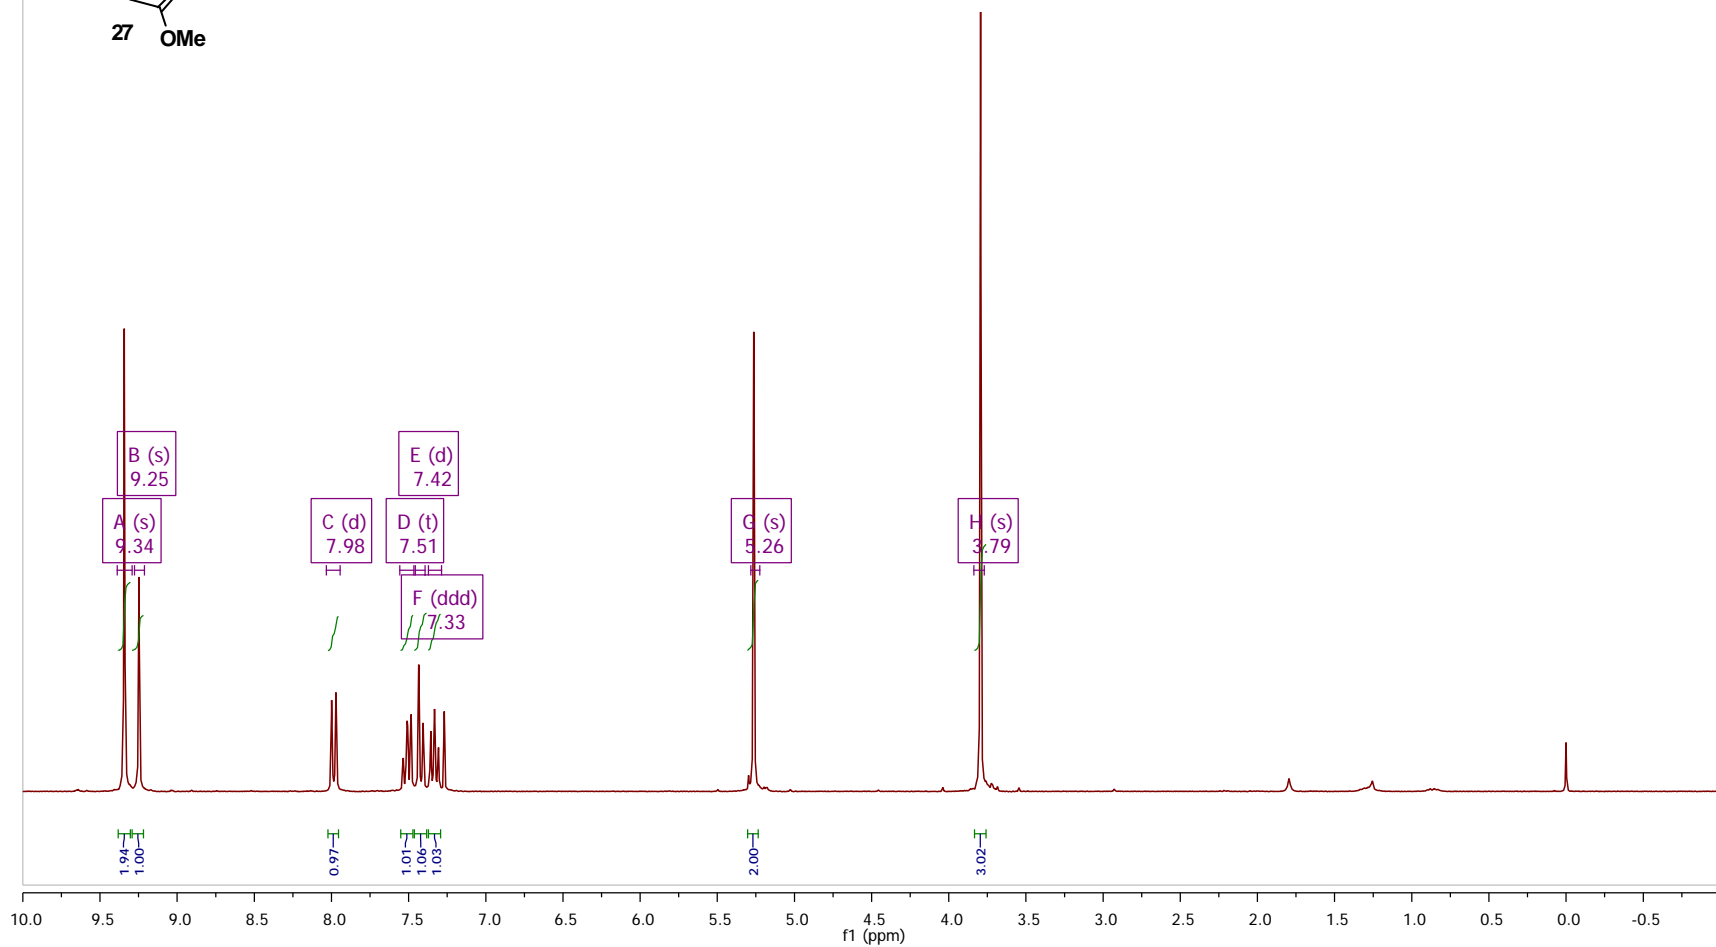

<sup>13</sup>C NMR (75 MHz, CDCl<sub>3</sub>)

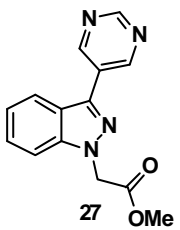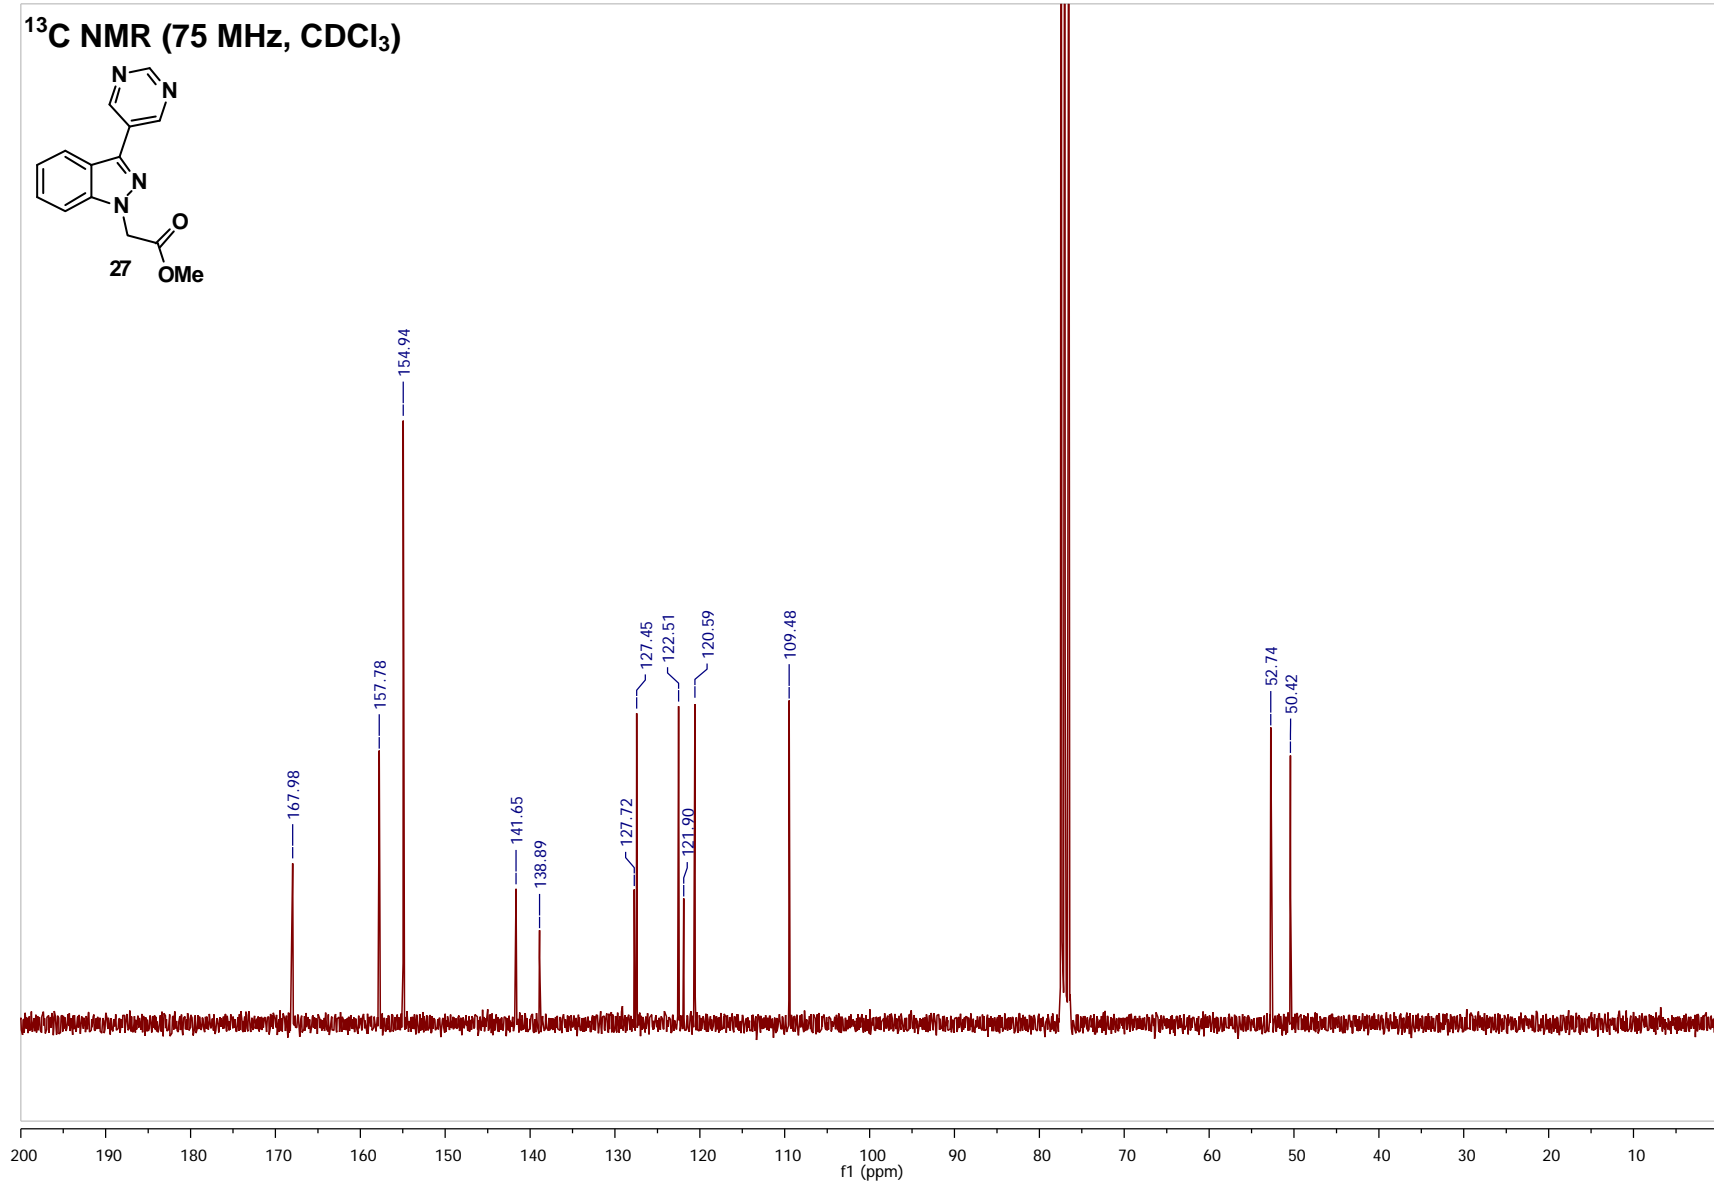

<sup>1</sup>H NMR (300 MHz, CDCl<sub>3</sub>)

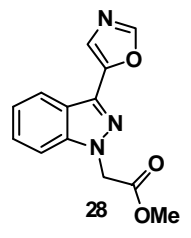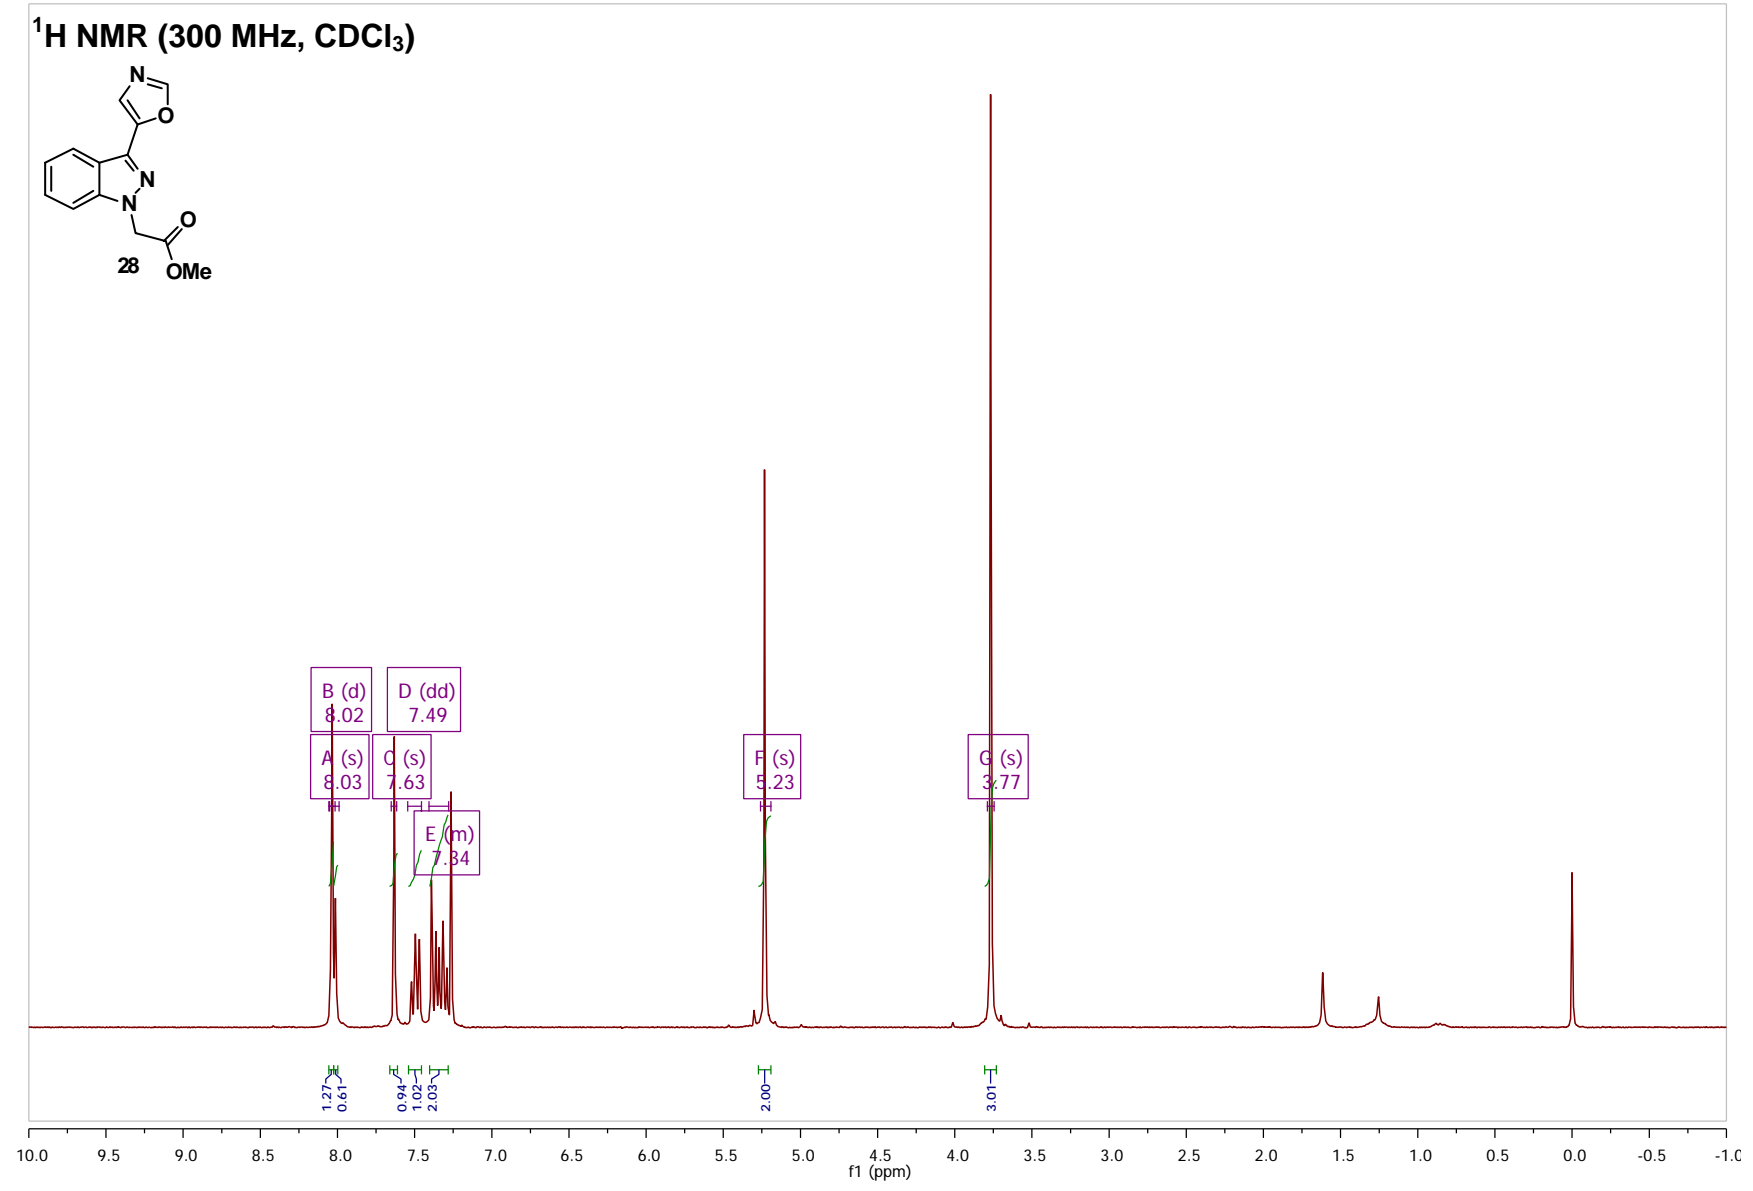

<sup>1</sup>H NMR (300 MHz, CDCl<sub>3</sub>)

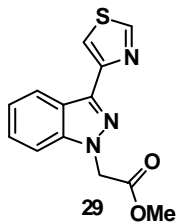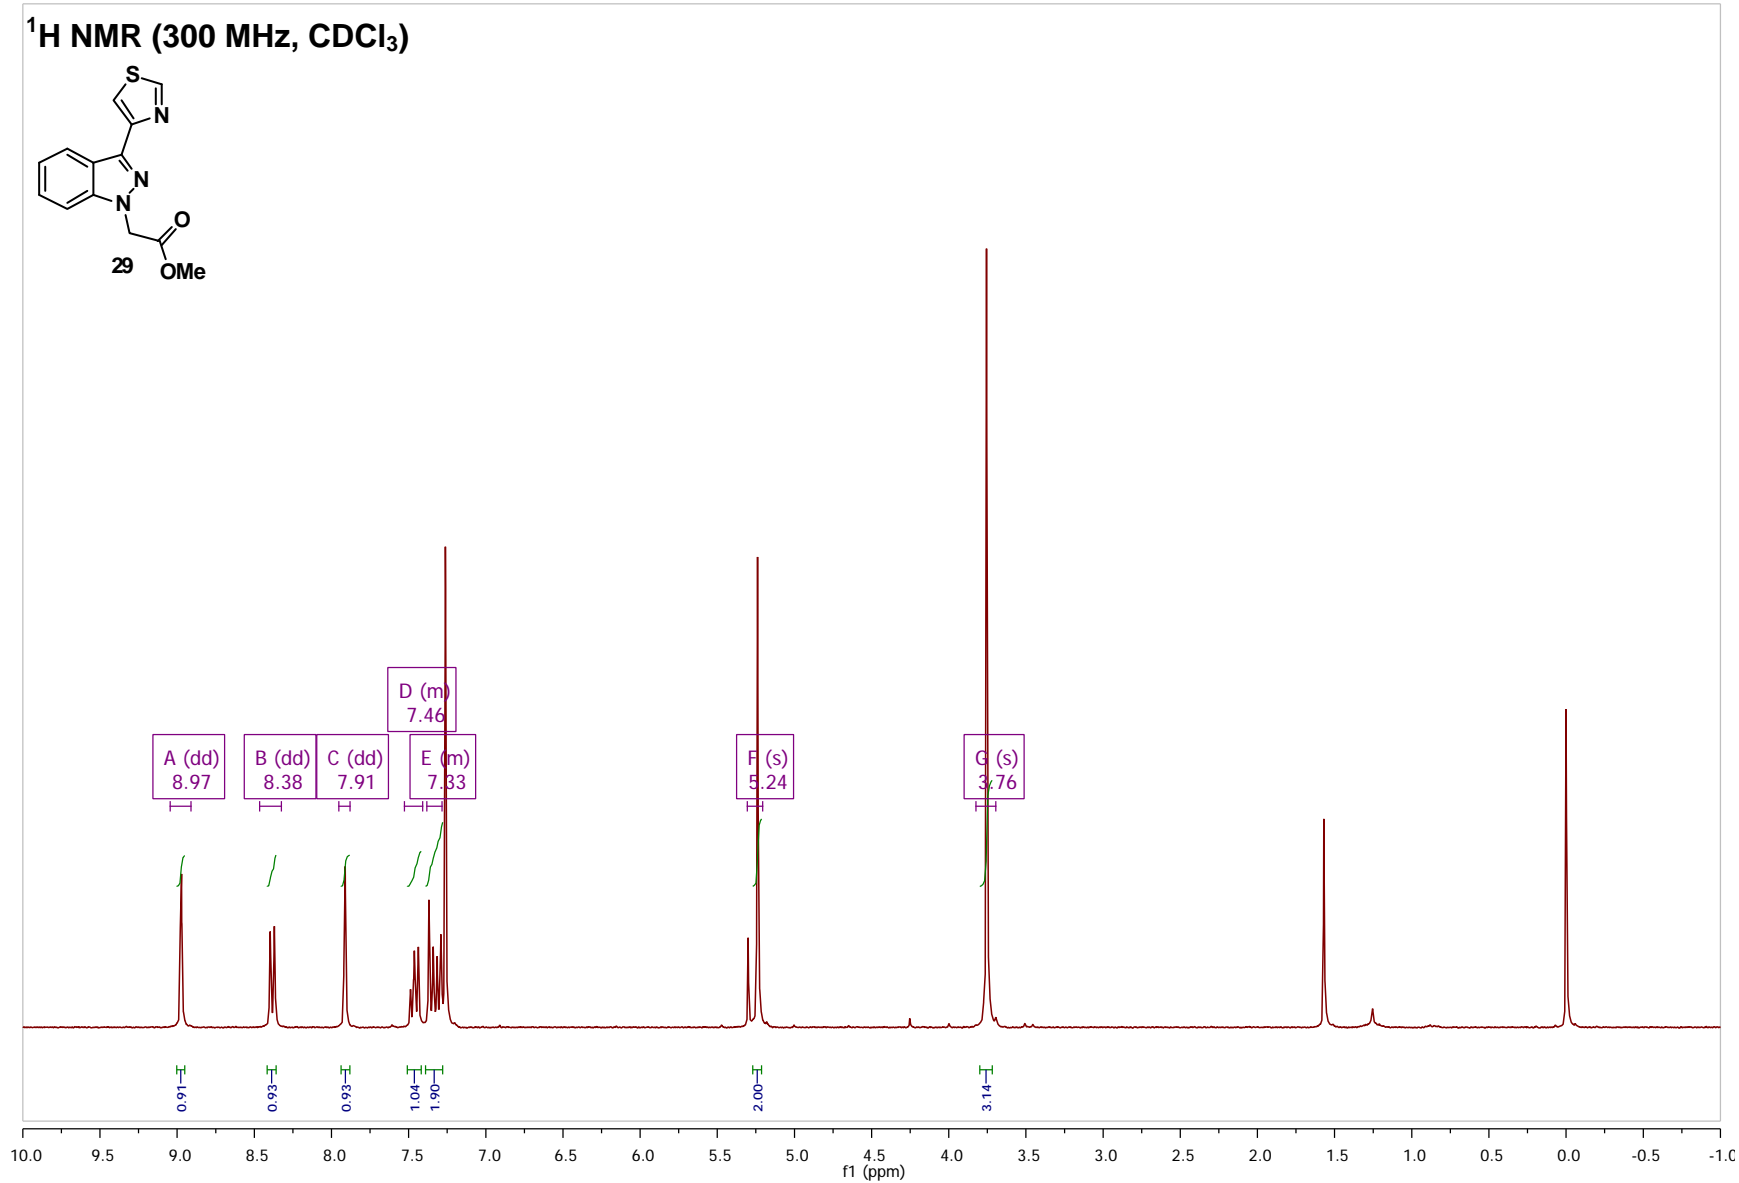

<sup>1</sup>H NMR (300 MHz, CDCl<sub>3</sub>)

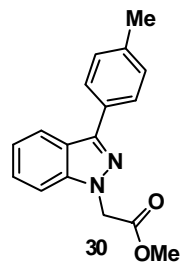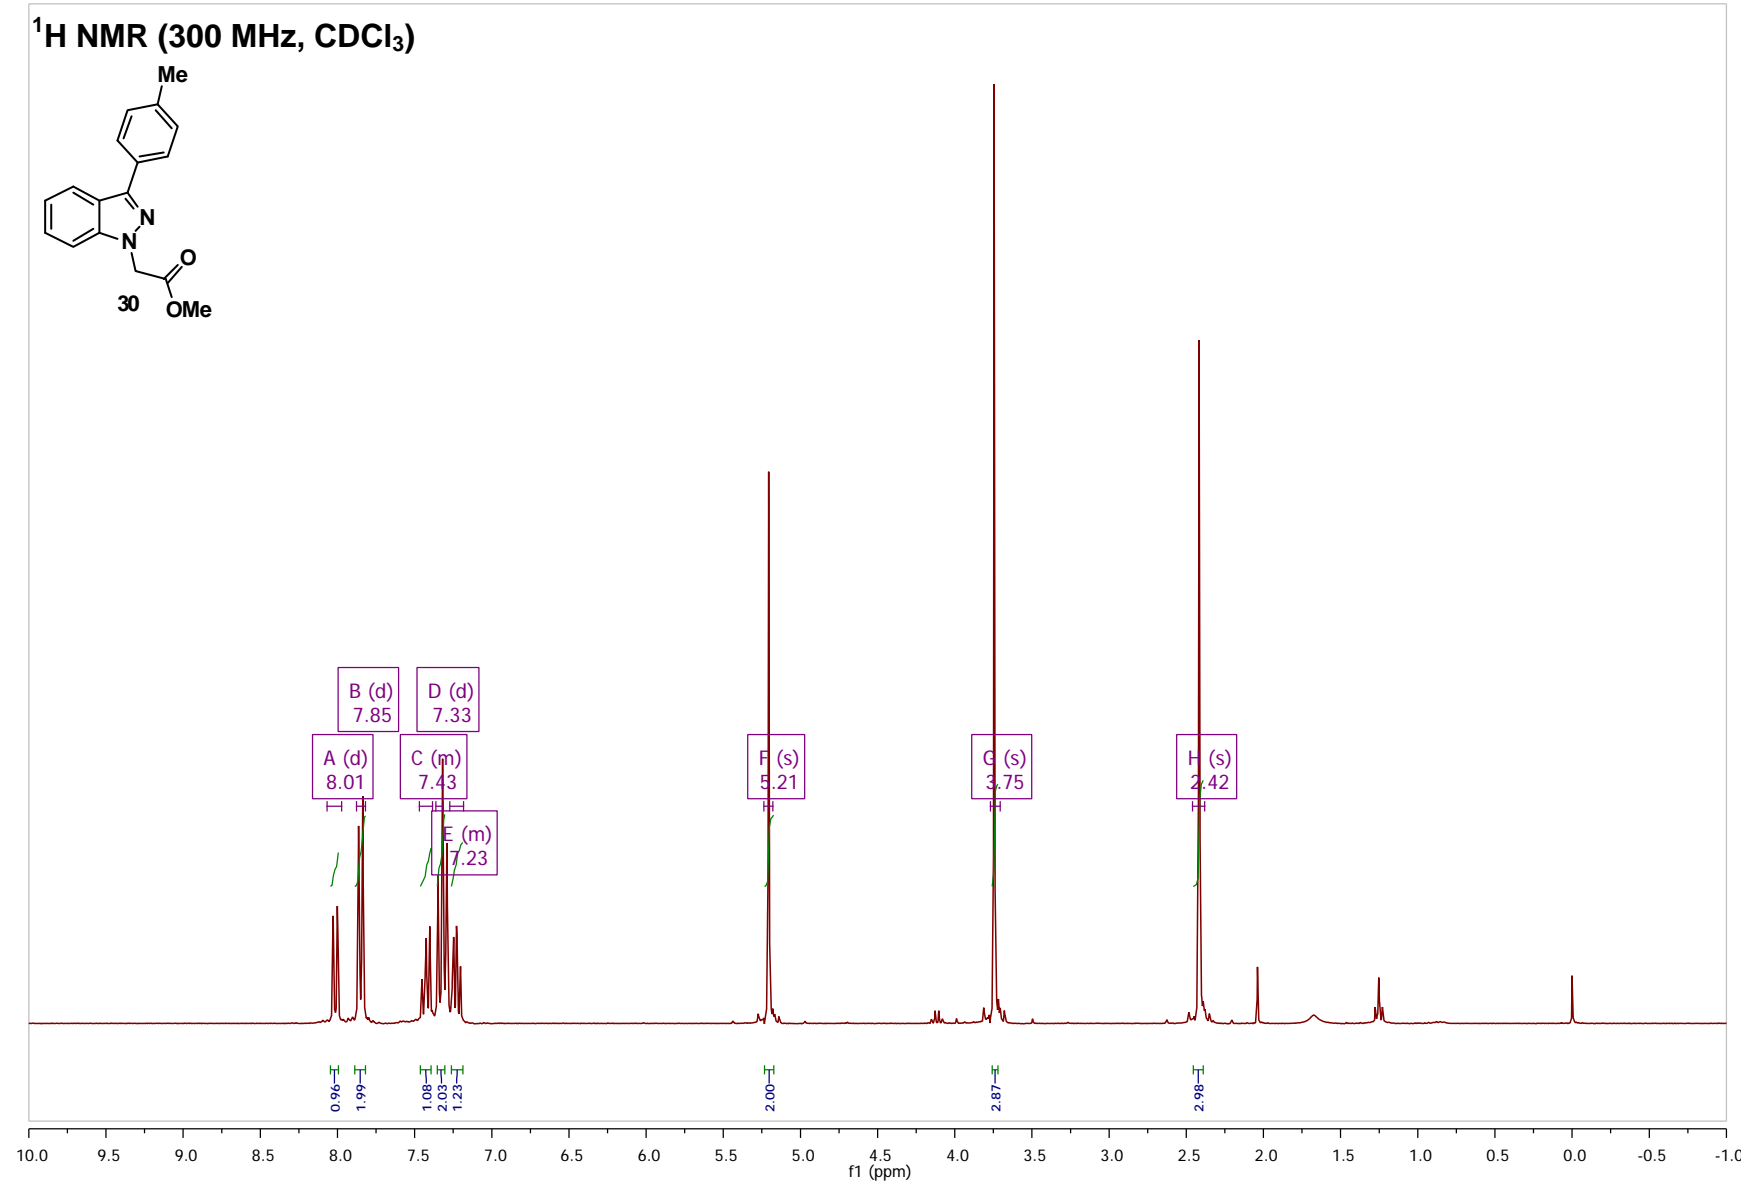



<sup>13</sup>C NMR (75 MHz, CDCl<sub>3</sub>)

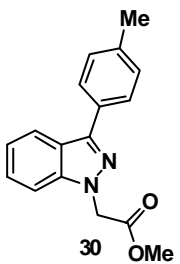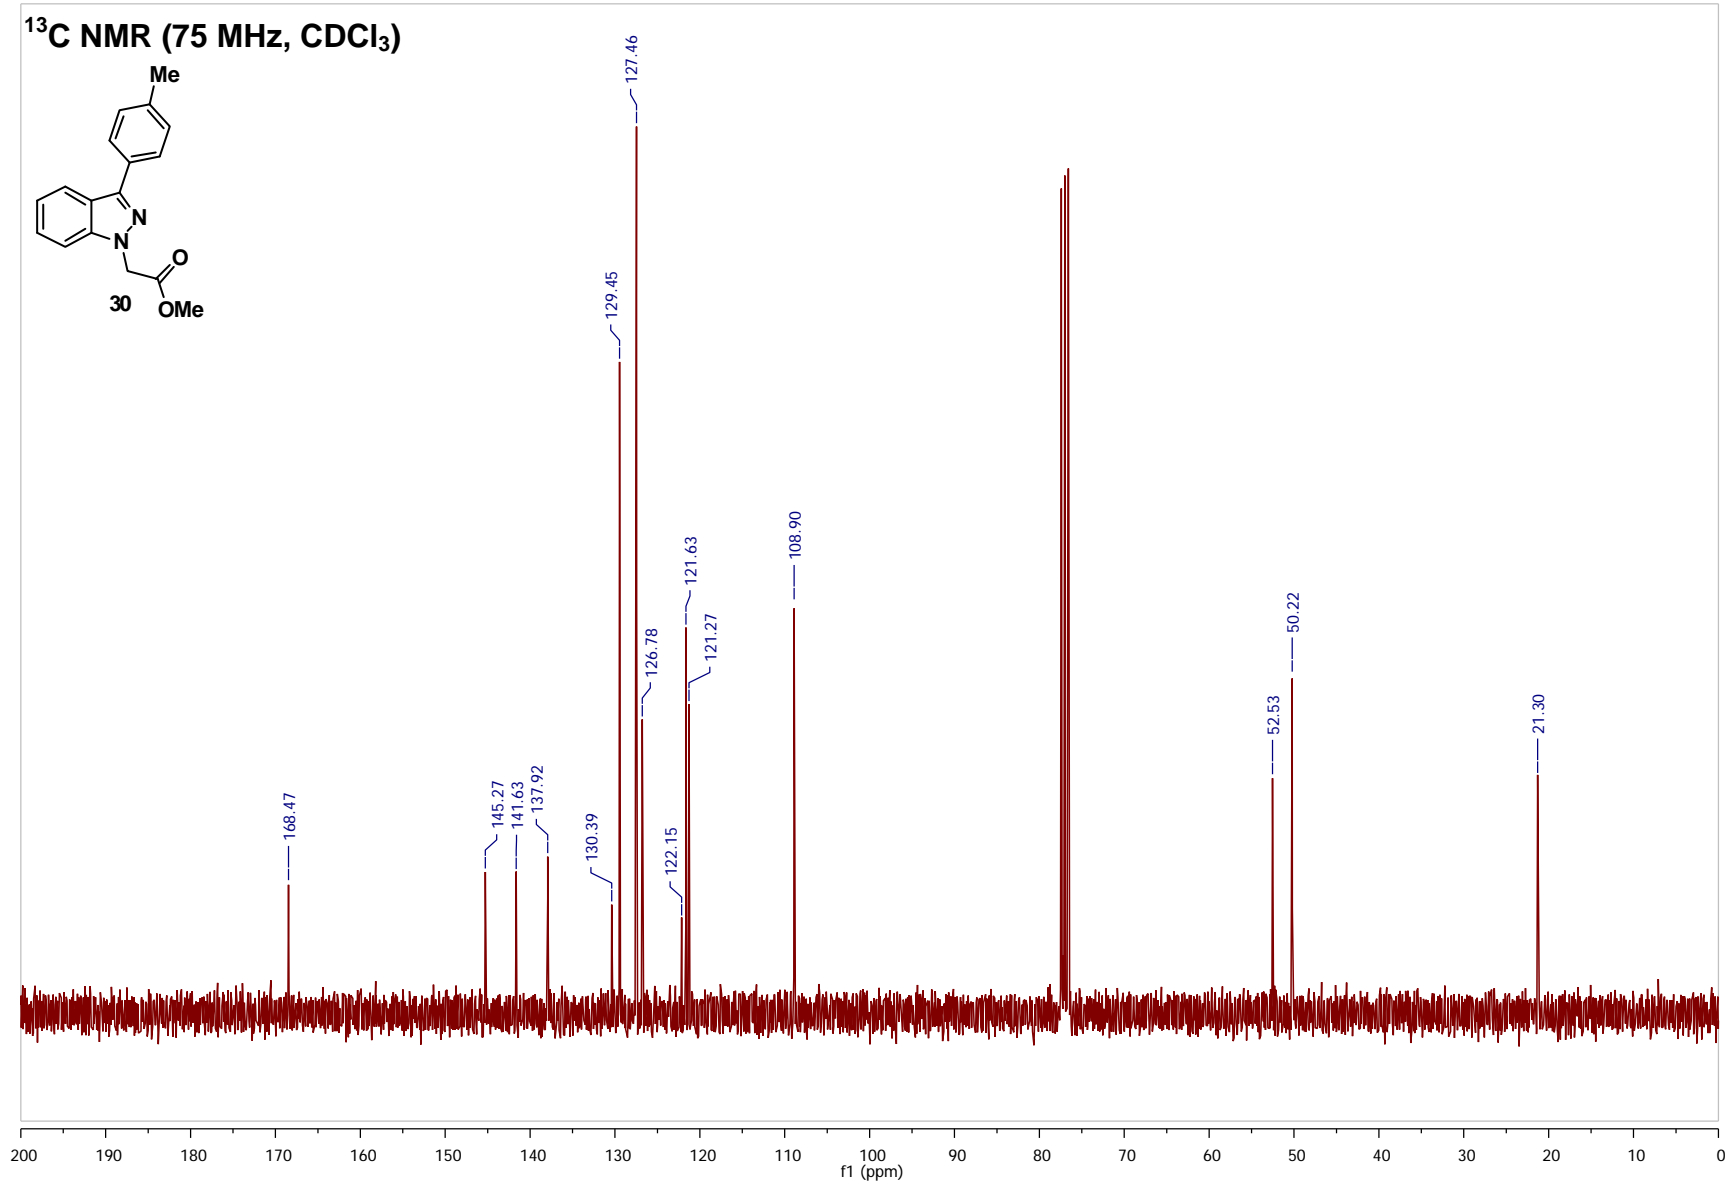

<sup>1</sup>H NMR (300 MHz, CDCl<sub>3</sub>)

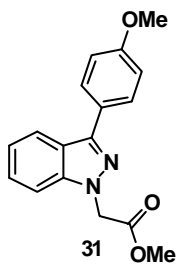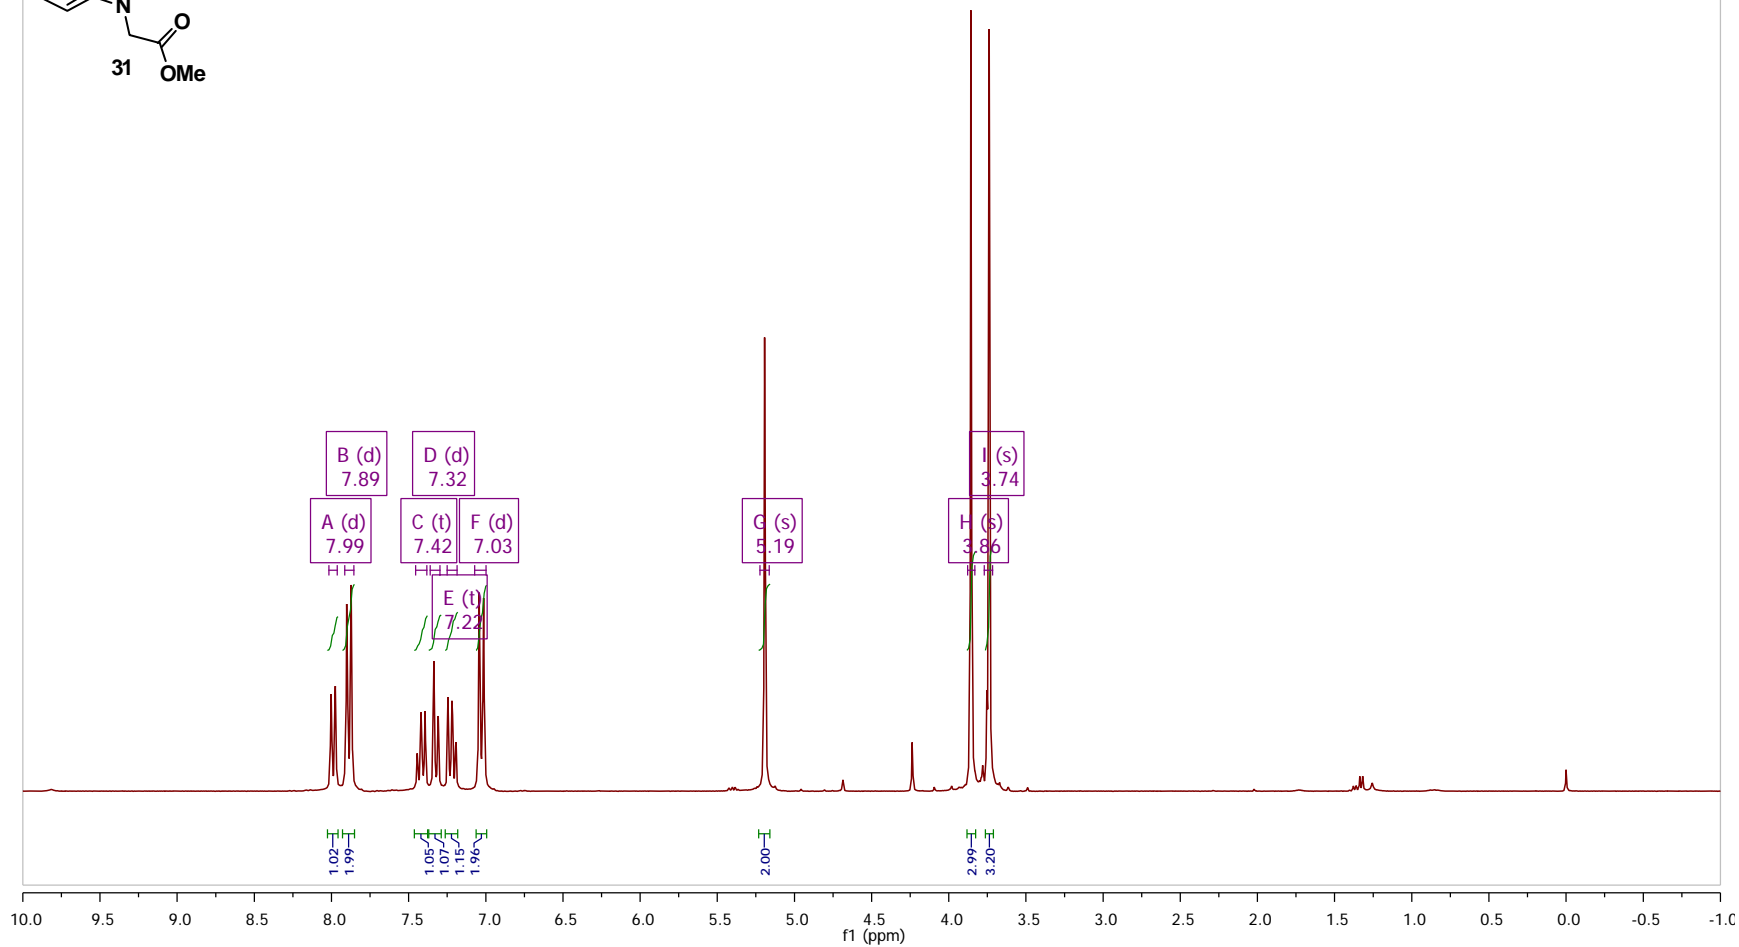

<sup>13</sup>C NMR (75 MHz, CDCl<sub>3</sub>)

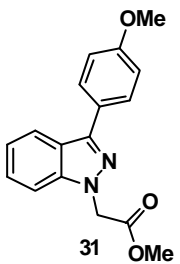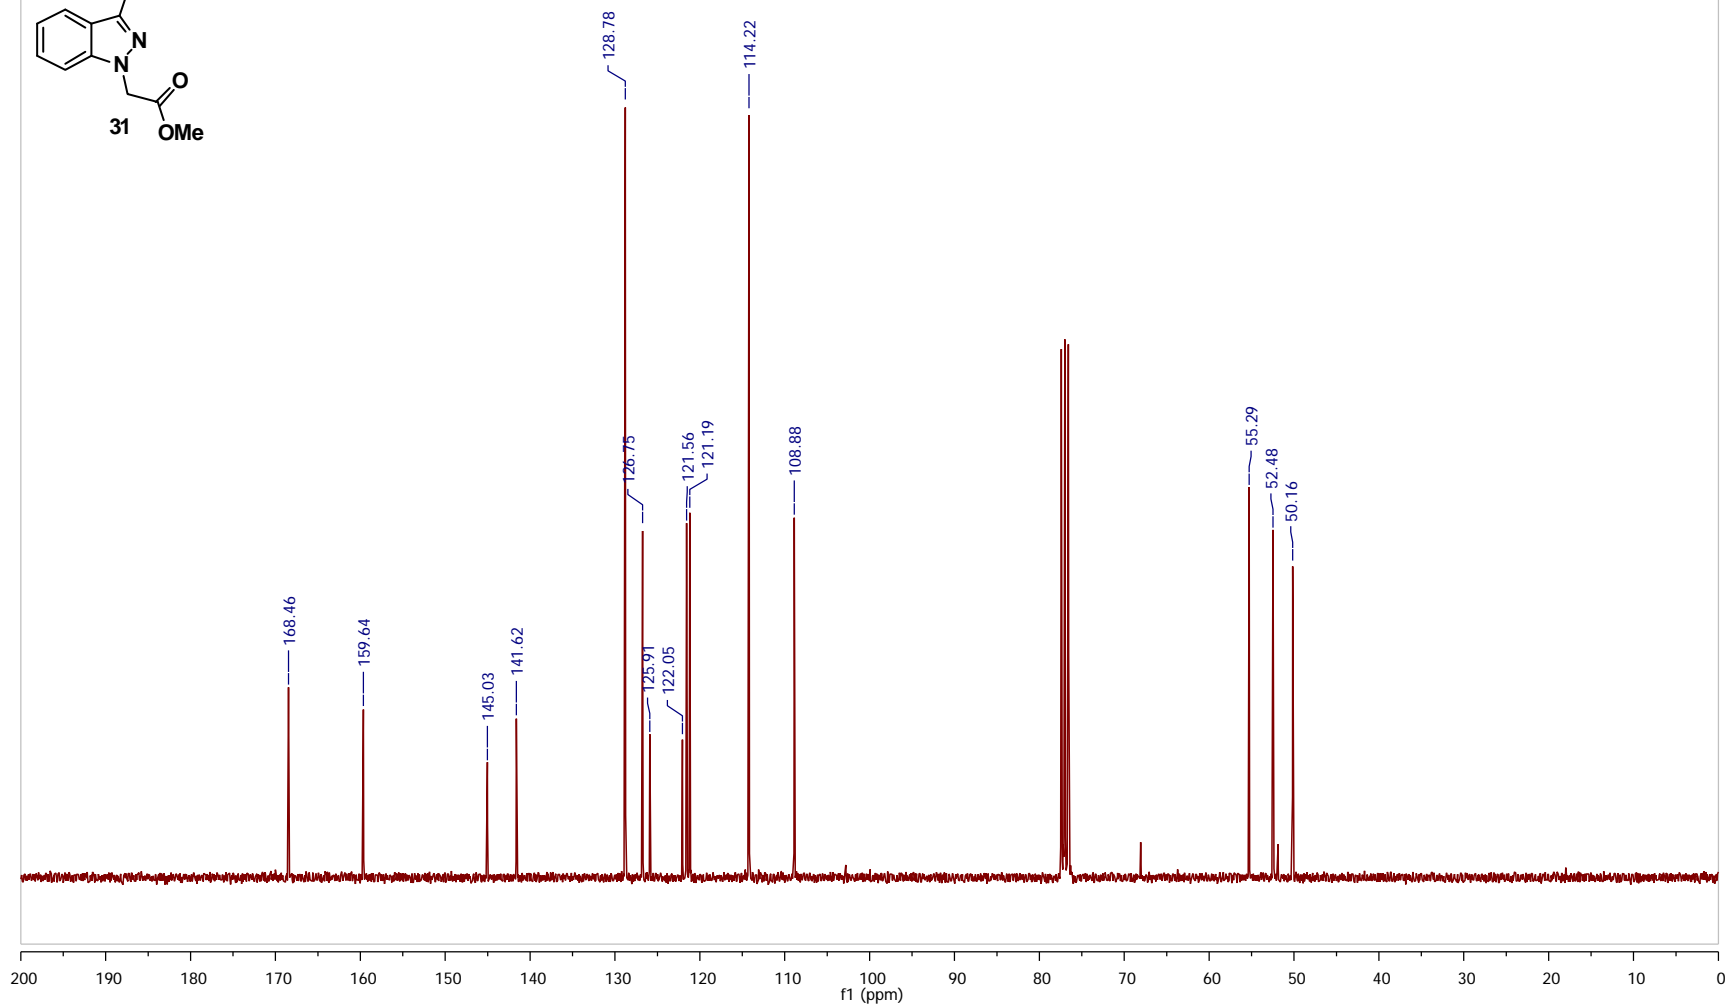

<sup>1</sup>H NMR (300 MHz, CDCl<sub>3</sub>)

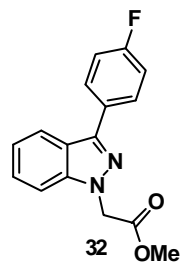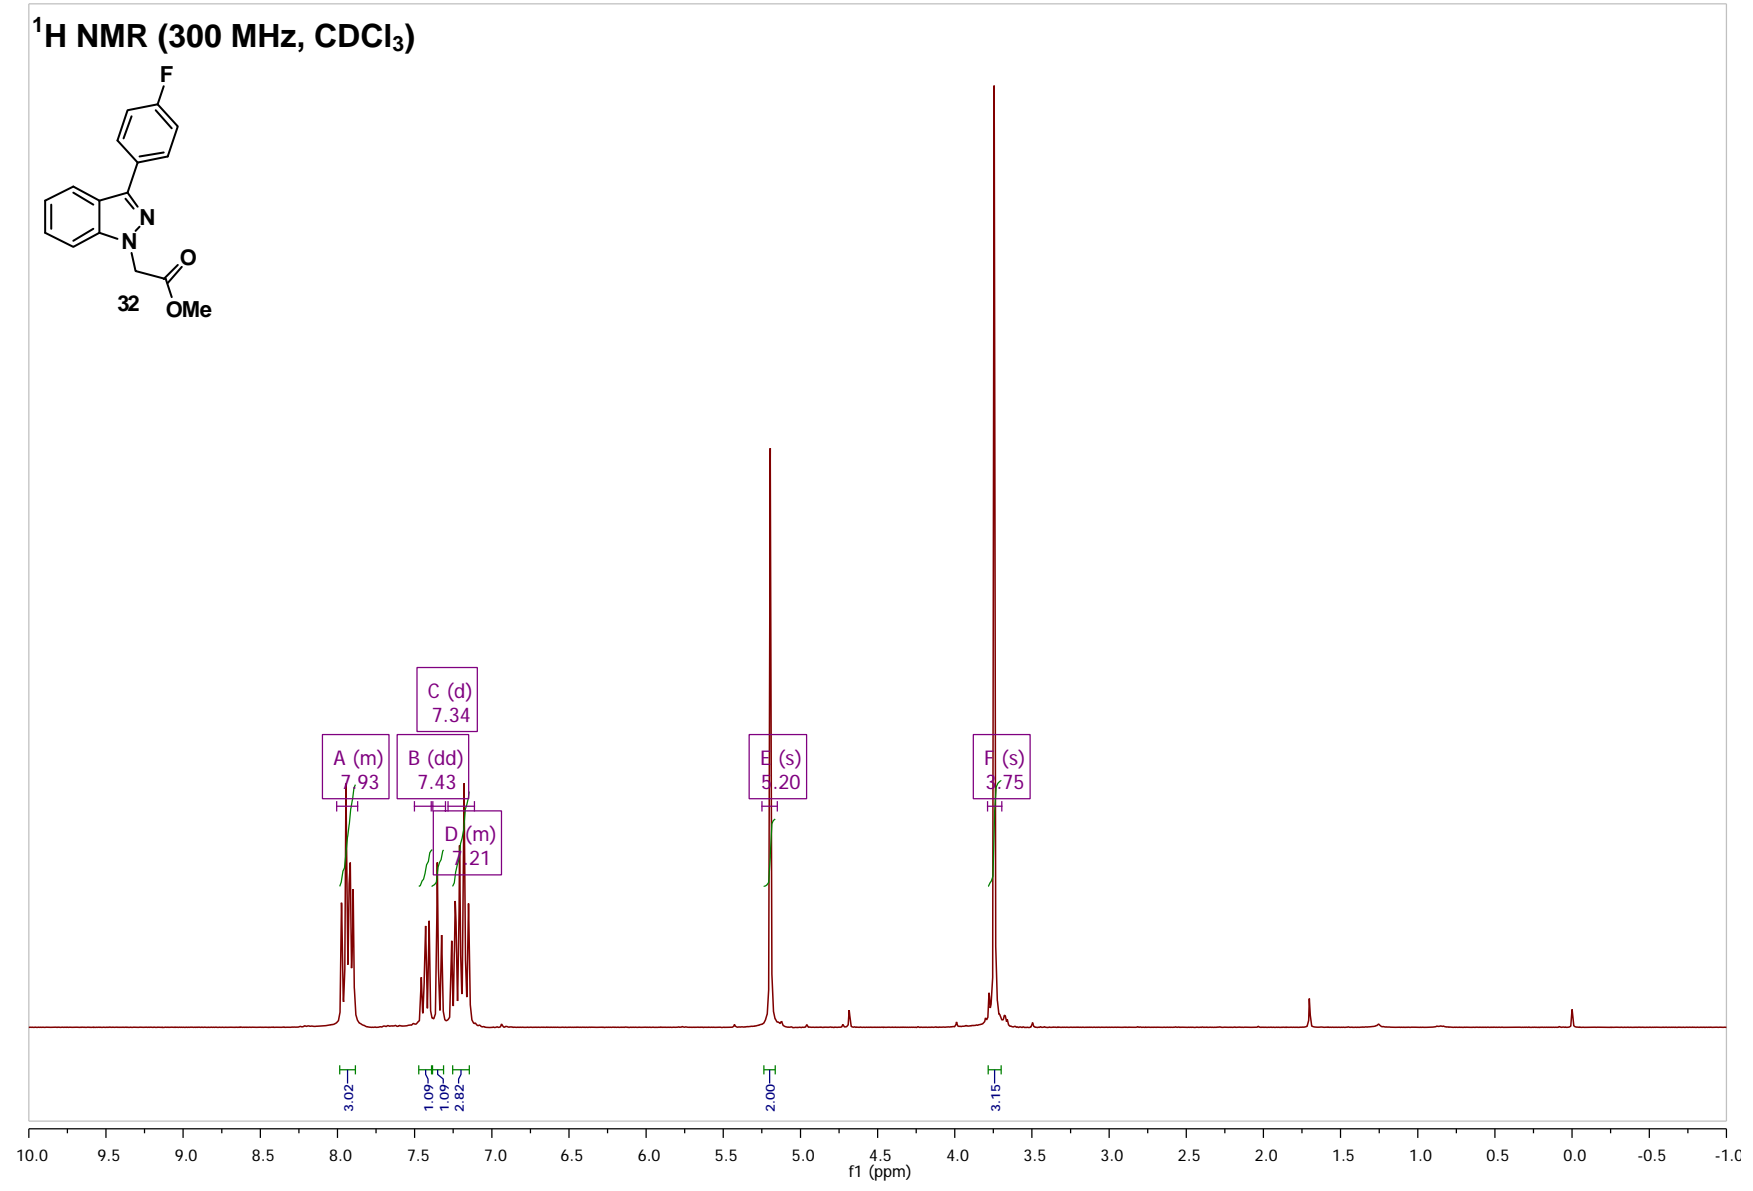

<sup>13</sup>C NMR (75 MHz, CDCl<sub>3</sub>)

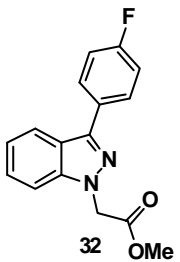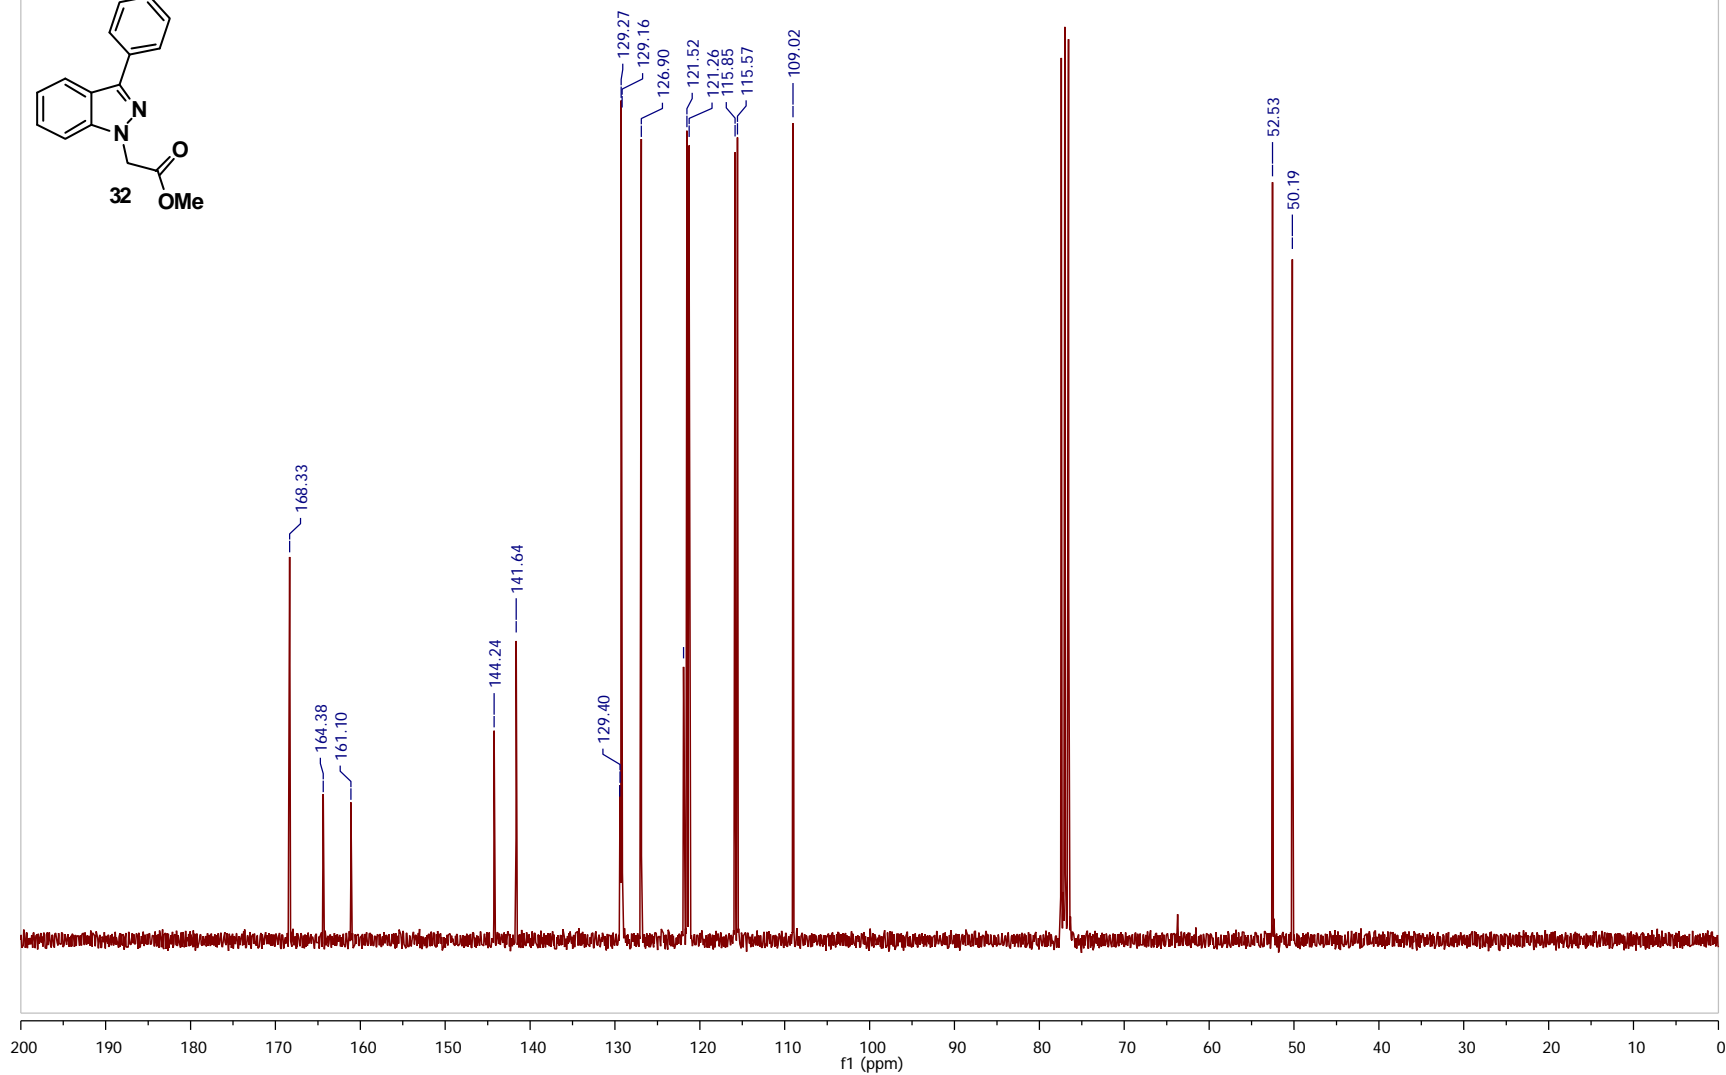

<sup>1</sup>H NMR (300 MHz, CDCl<sub>3</sub>)

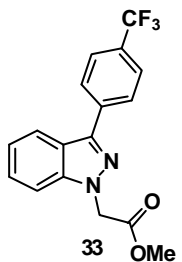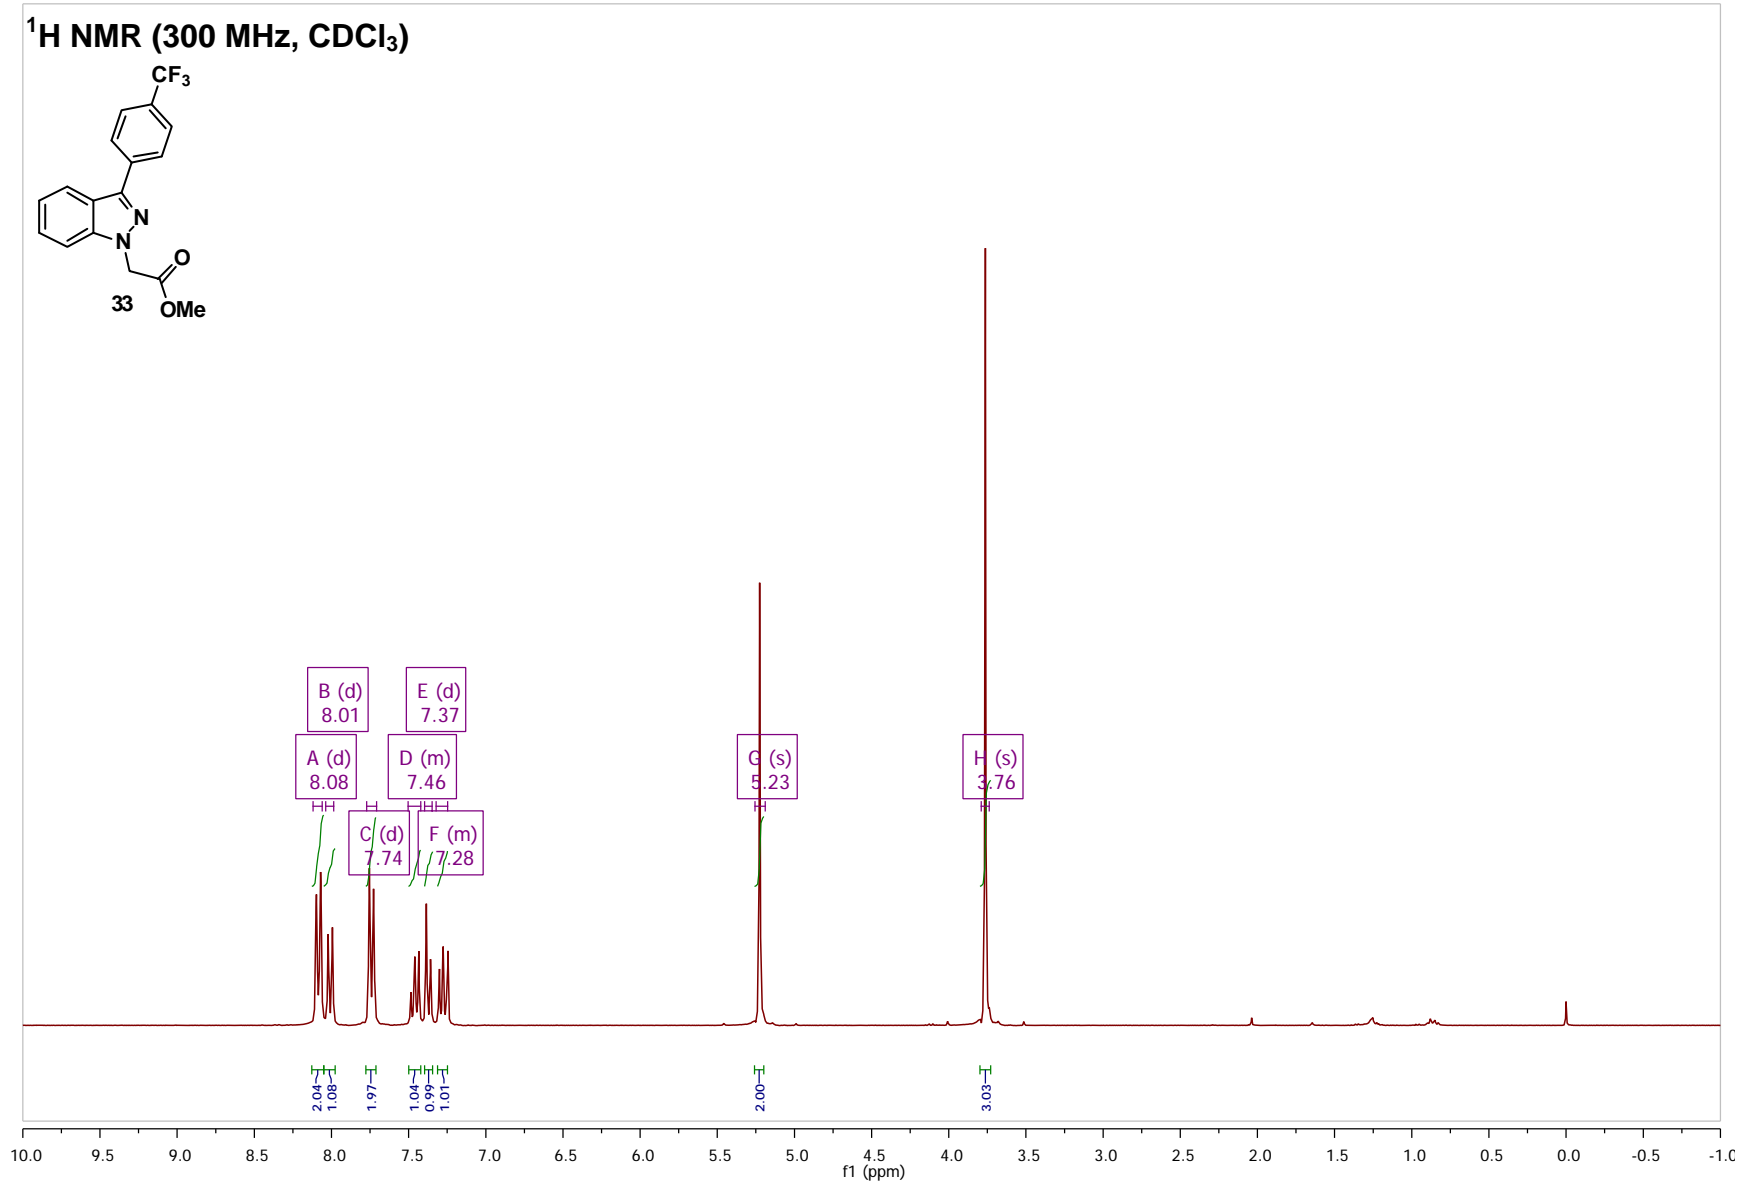

**<sup>13</sup>C NMR (75 MHz, CDCl<sub>3</sub>)**

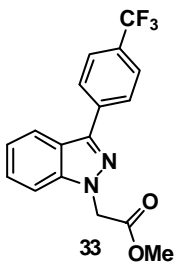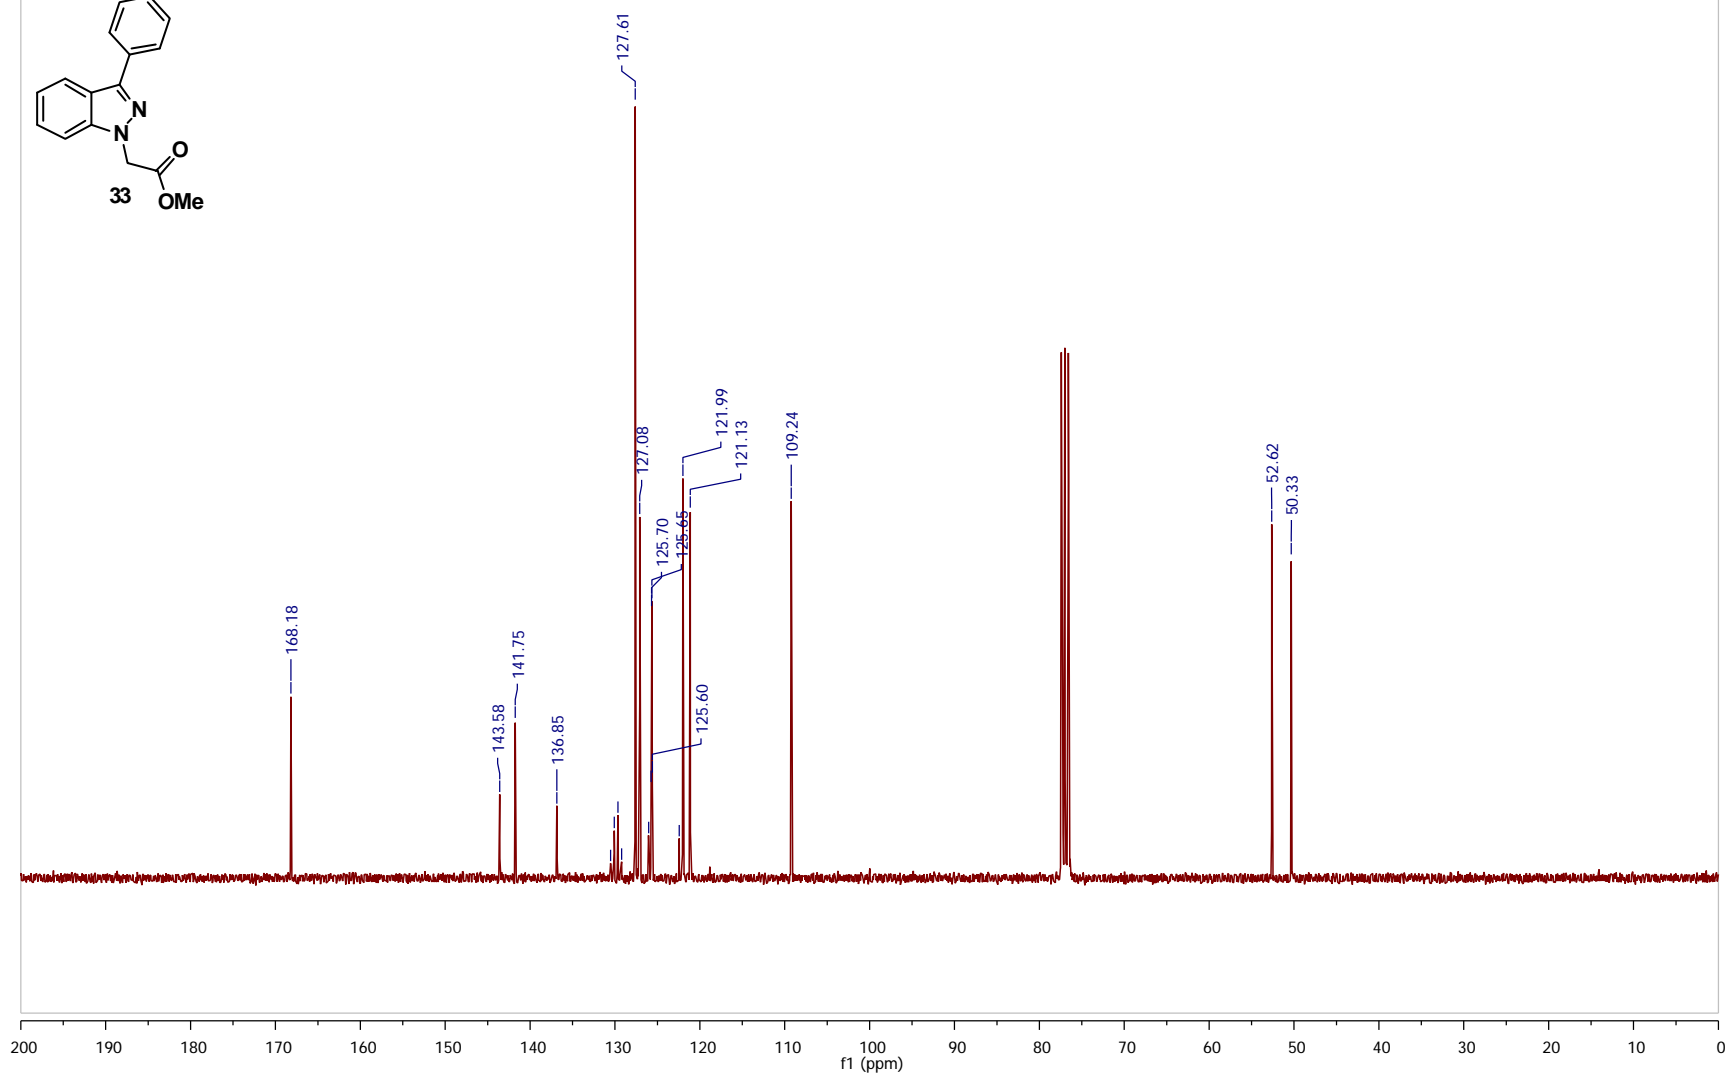

<sup>1</sup>H NMR (300 MHz, CDCl<sub>3</sub>)

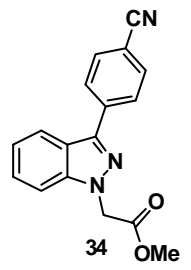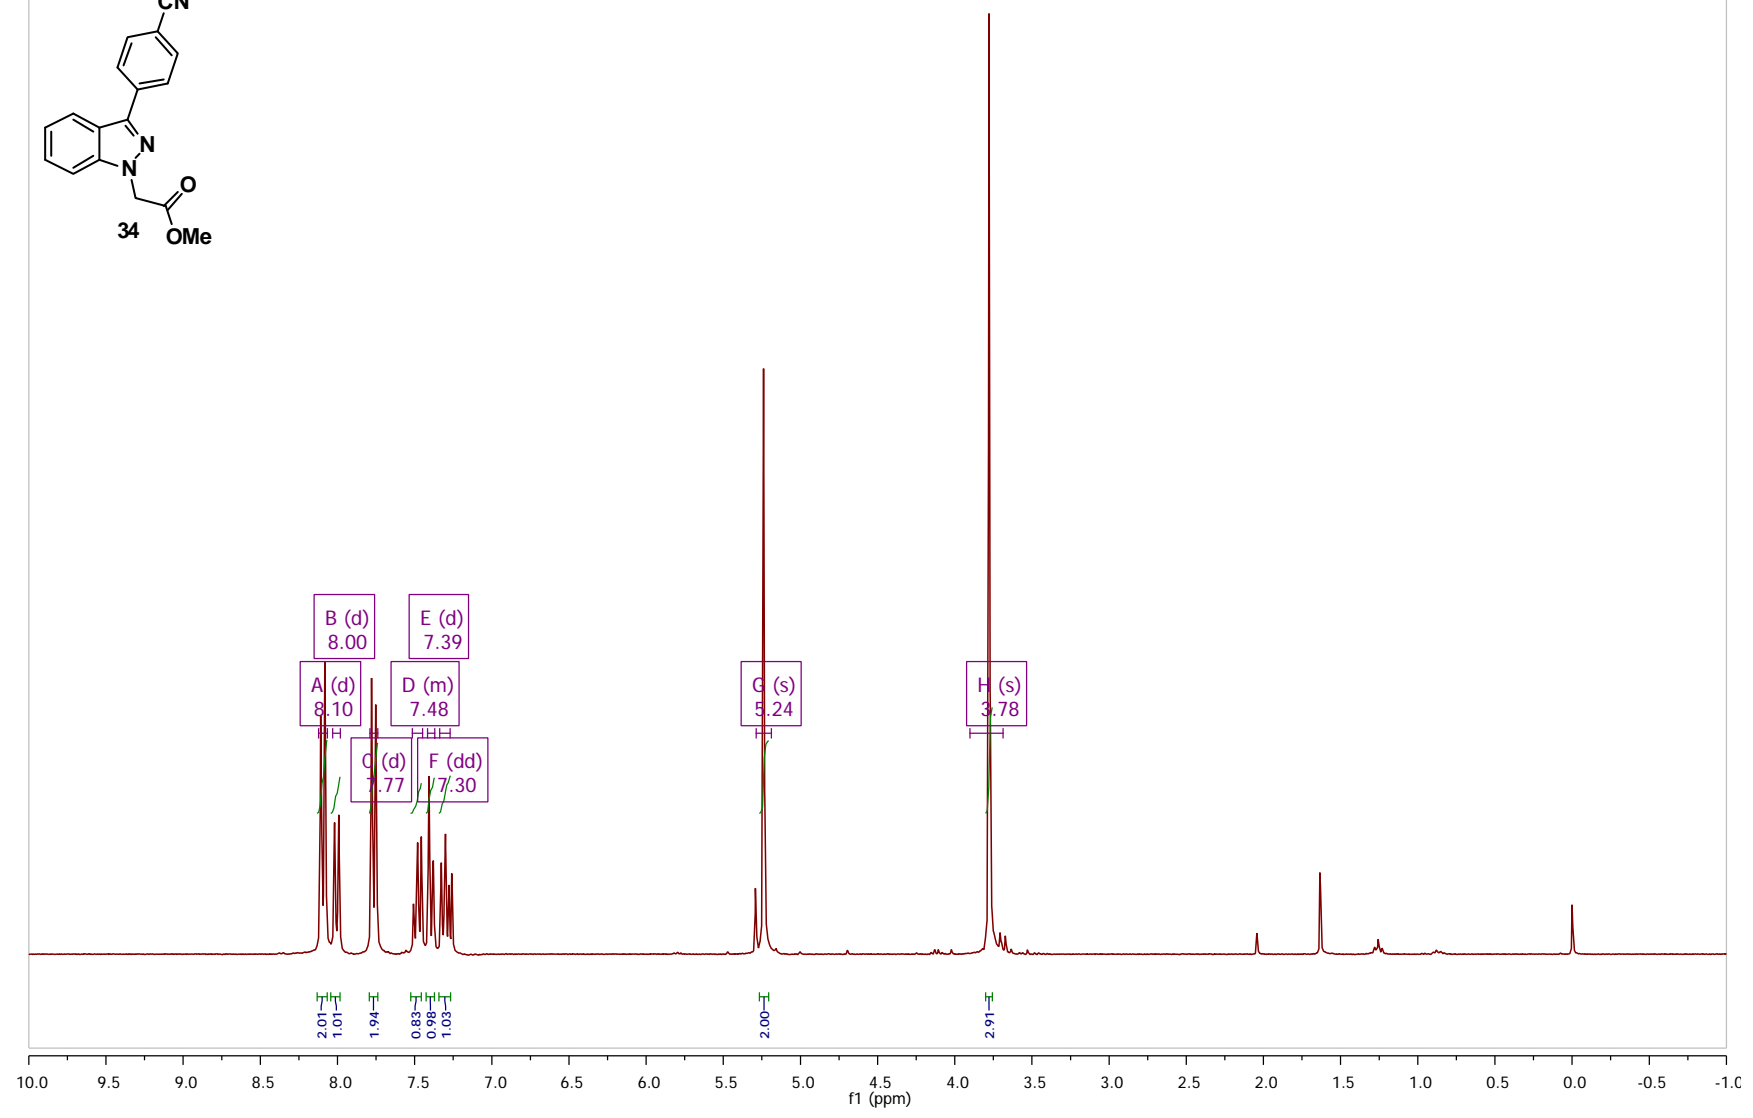



<sup>1</sup>H NMR (300 MHz, CDCl<sub>3</sub>)

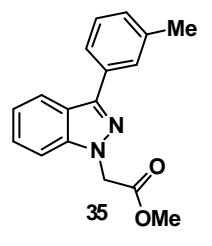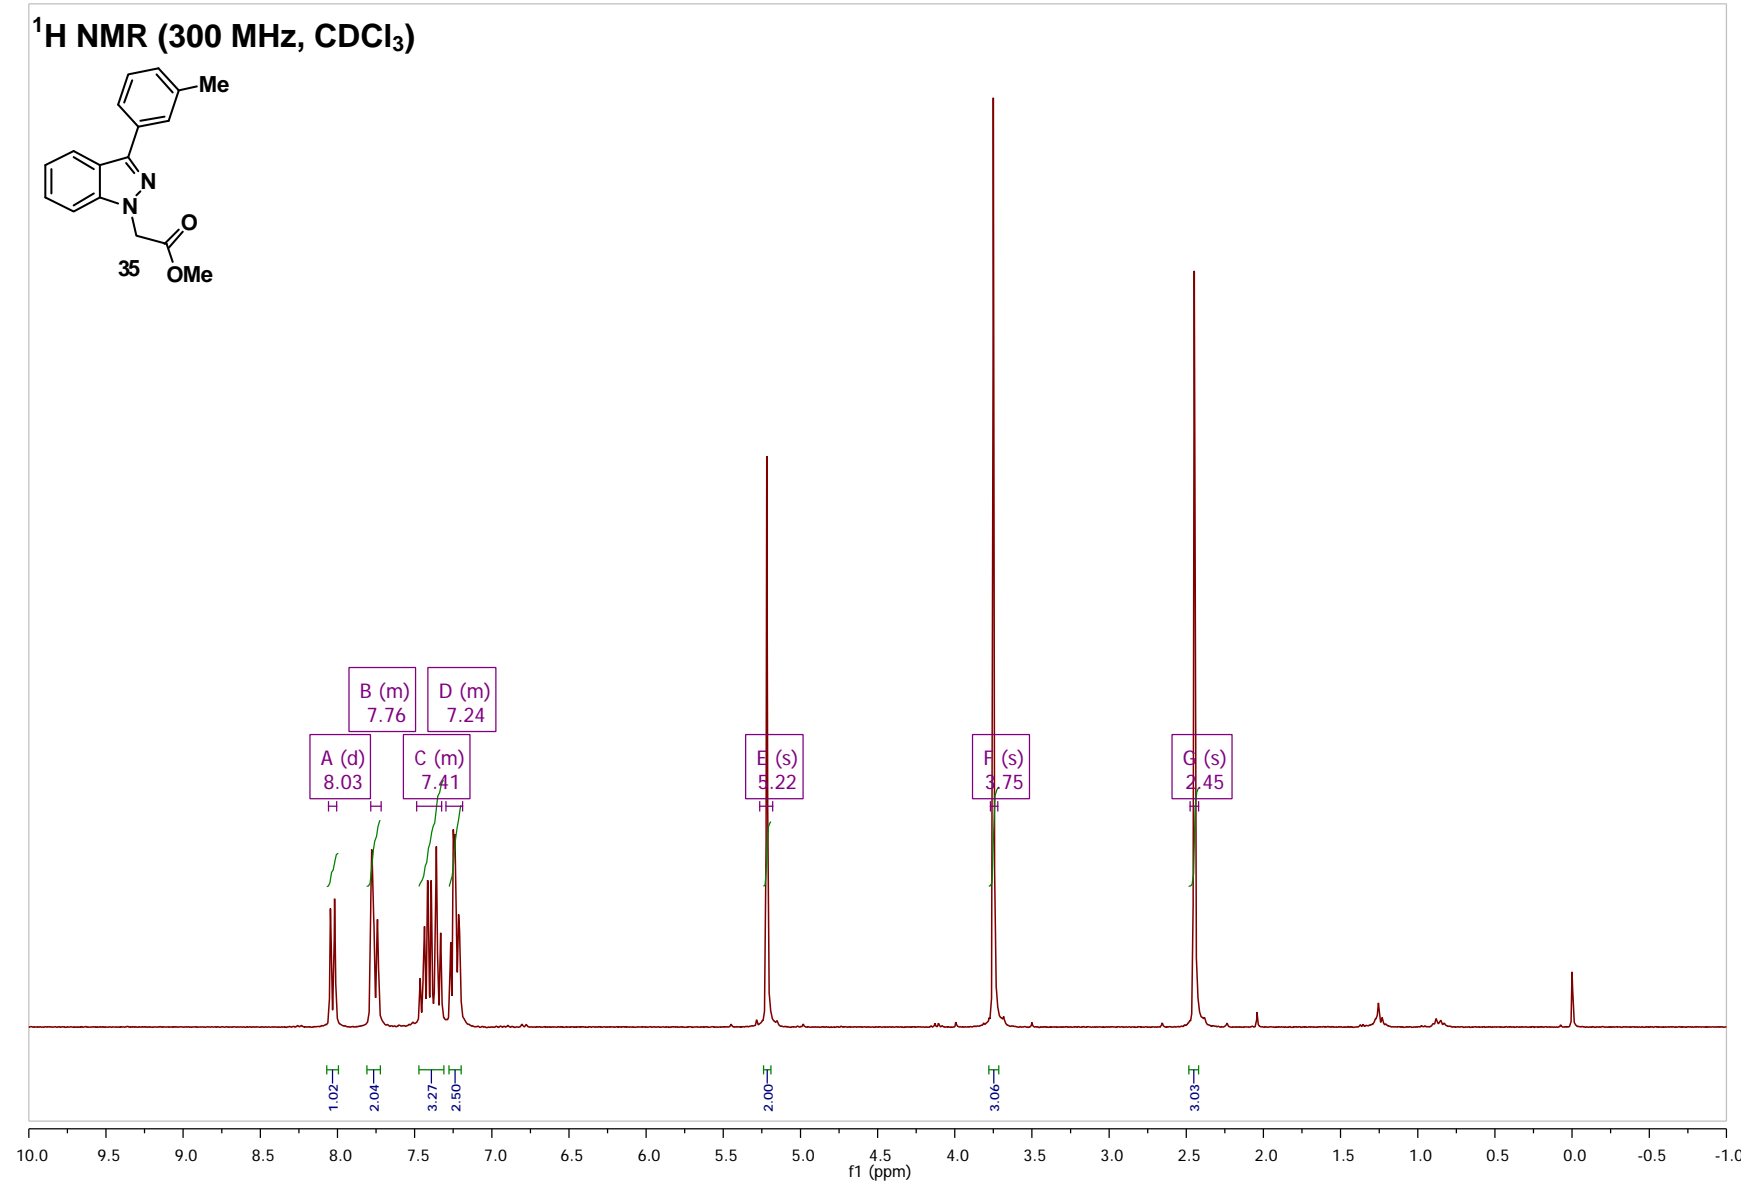

**<sup>13</sup>C NMR (75 MHz, CDCl<sub>3</sub>)**

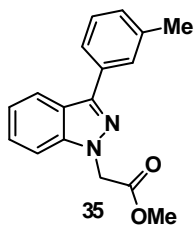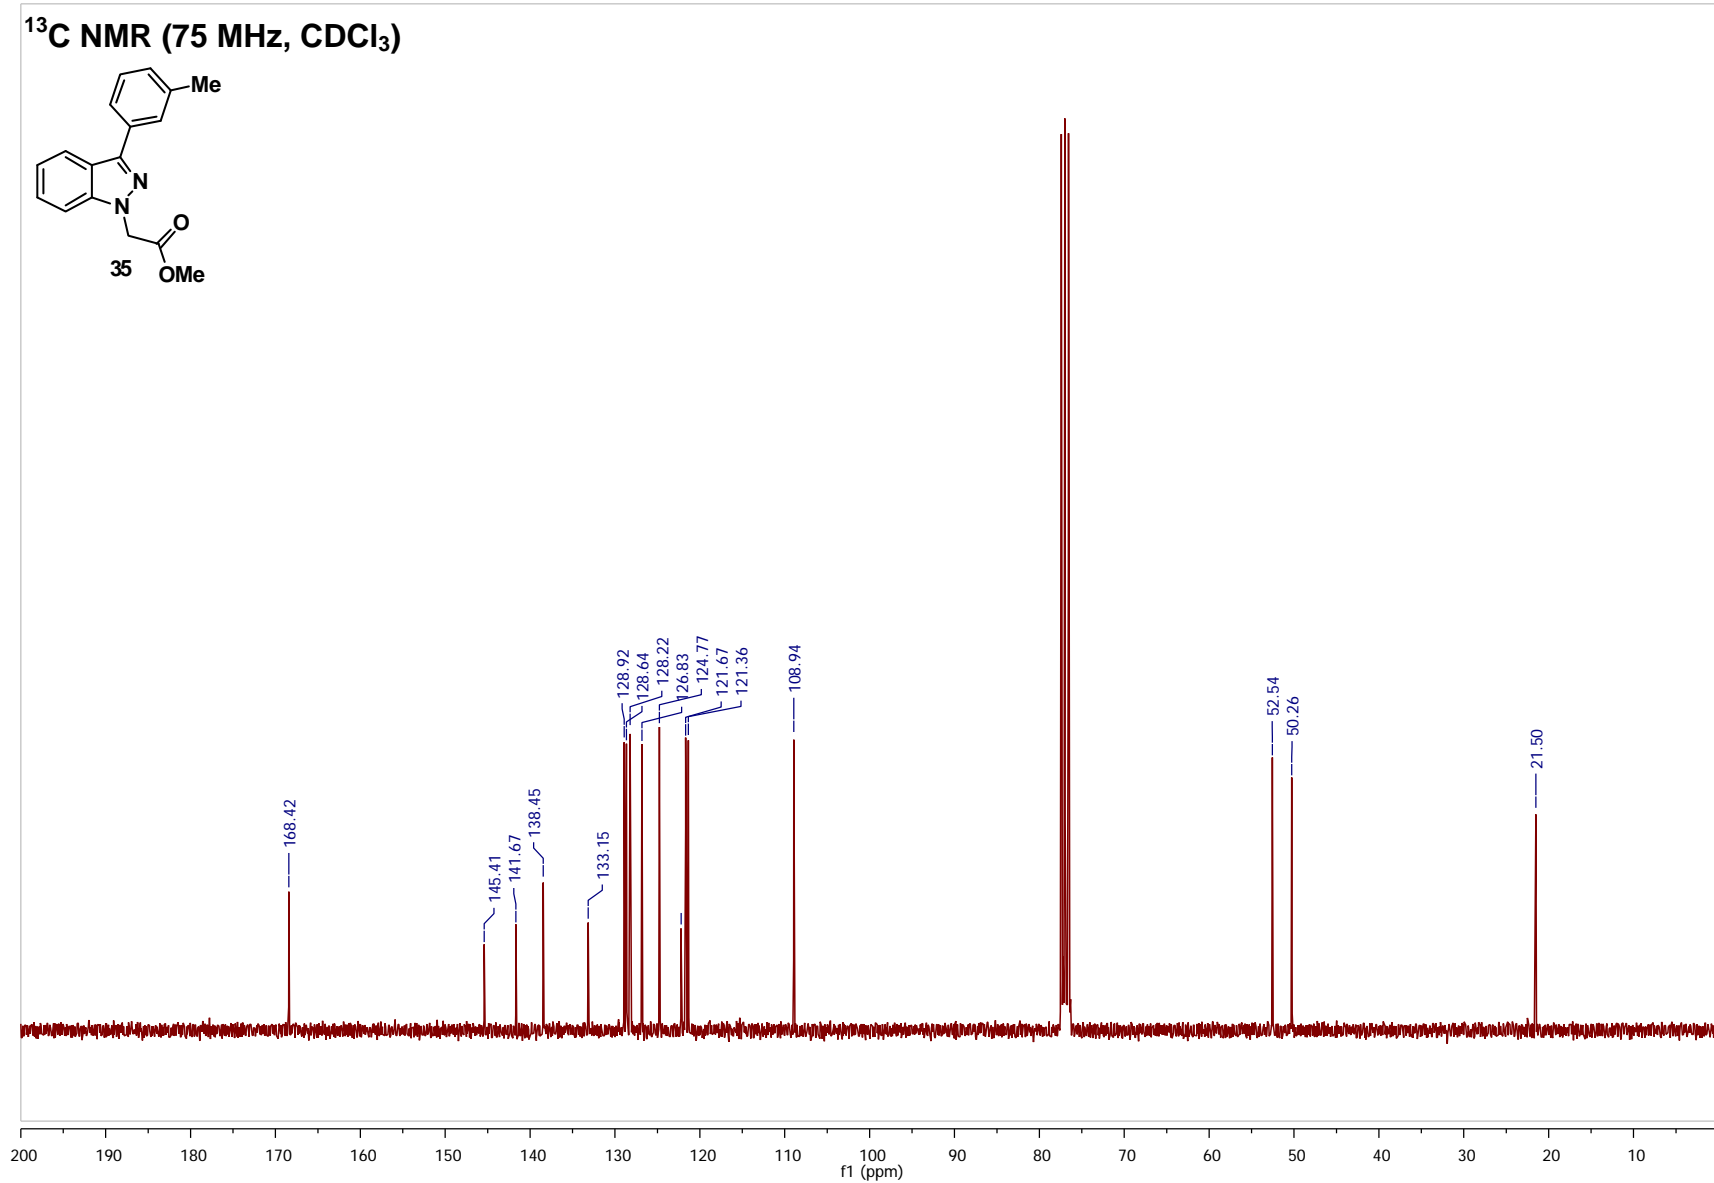

**<sup>1</sup>H NMR (300 MHz, CDCl<sub>3</sub>)**

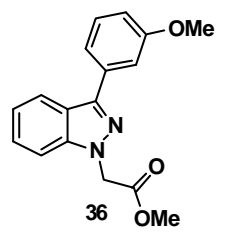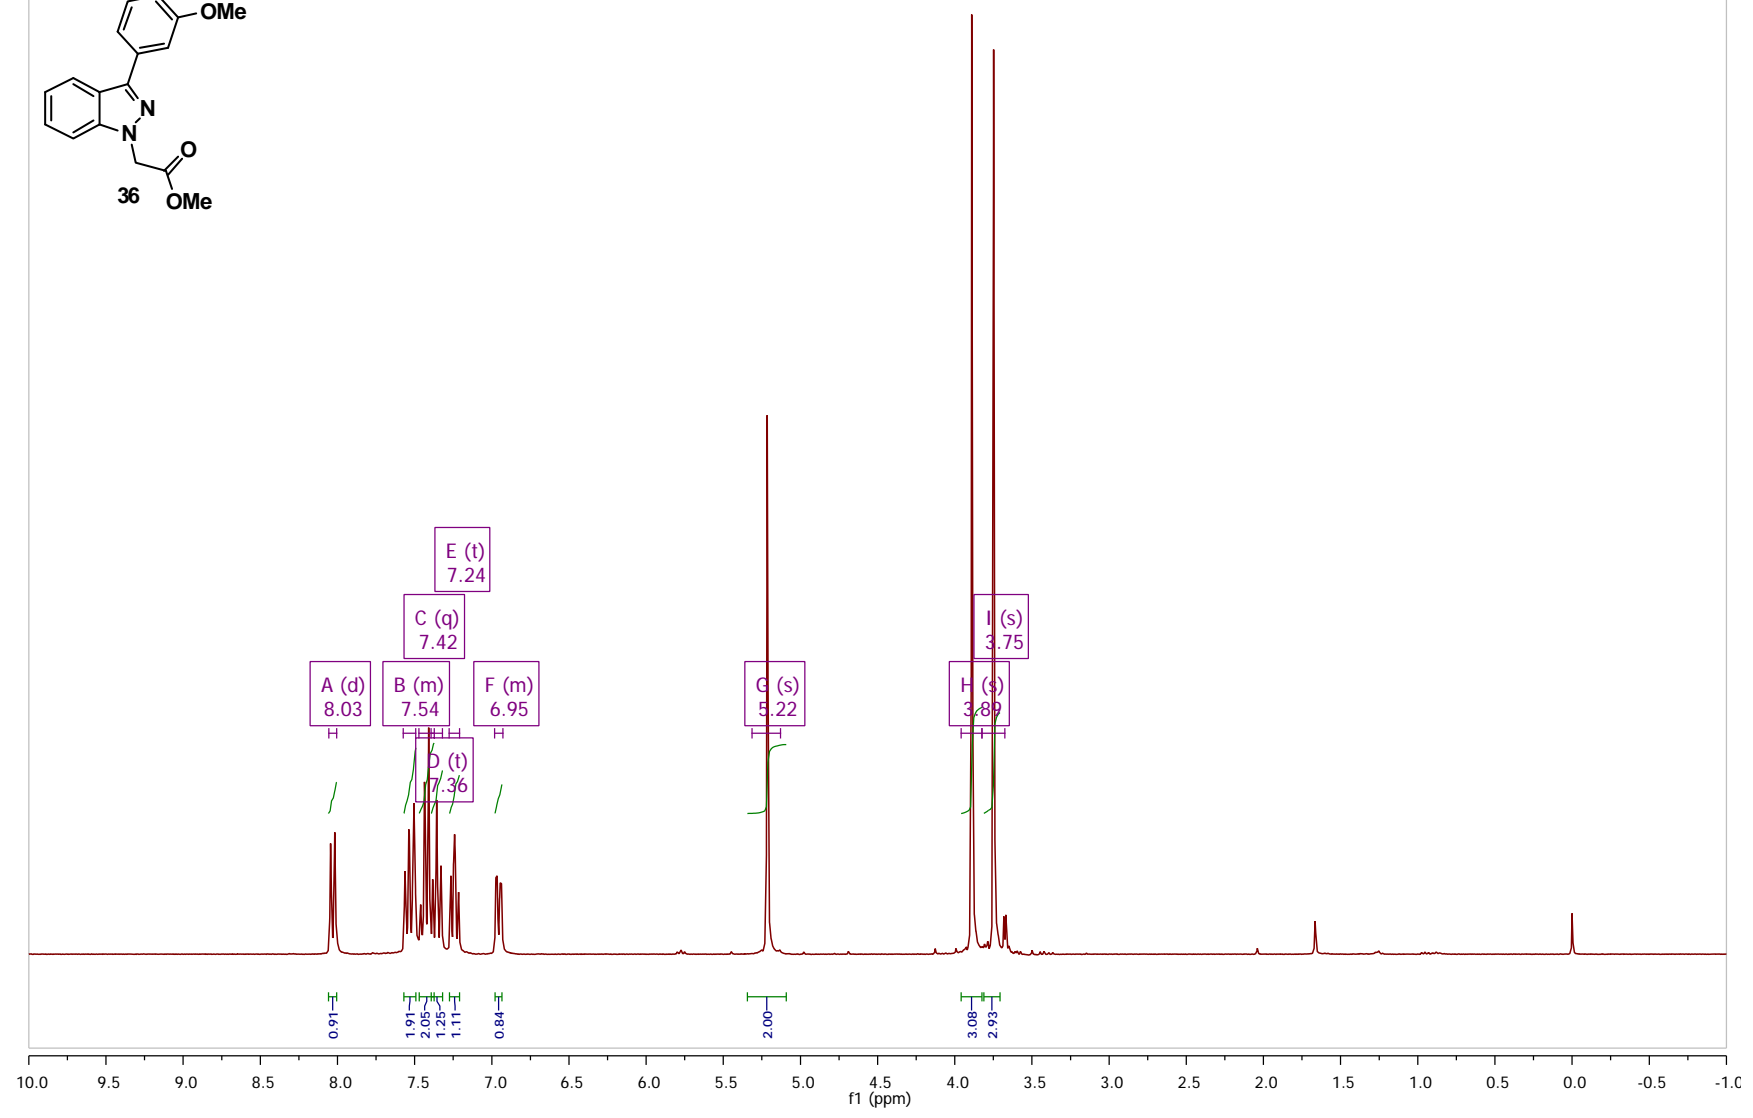

**<sup>13</sup>C NMR (75 MHz, CDCl<sub>3</sub>)**

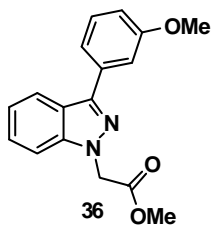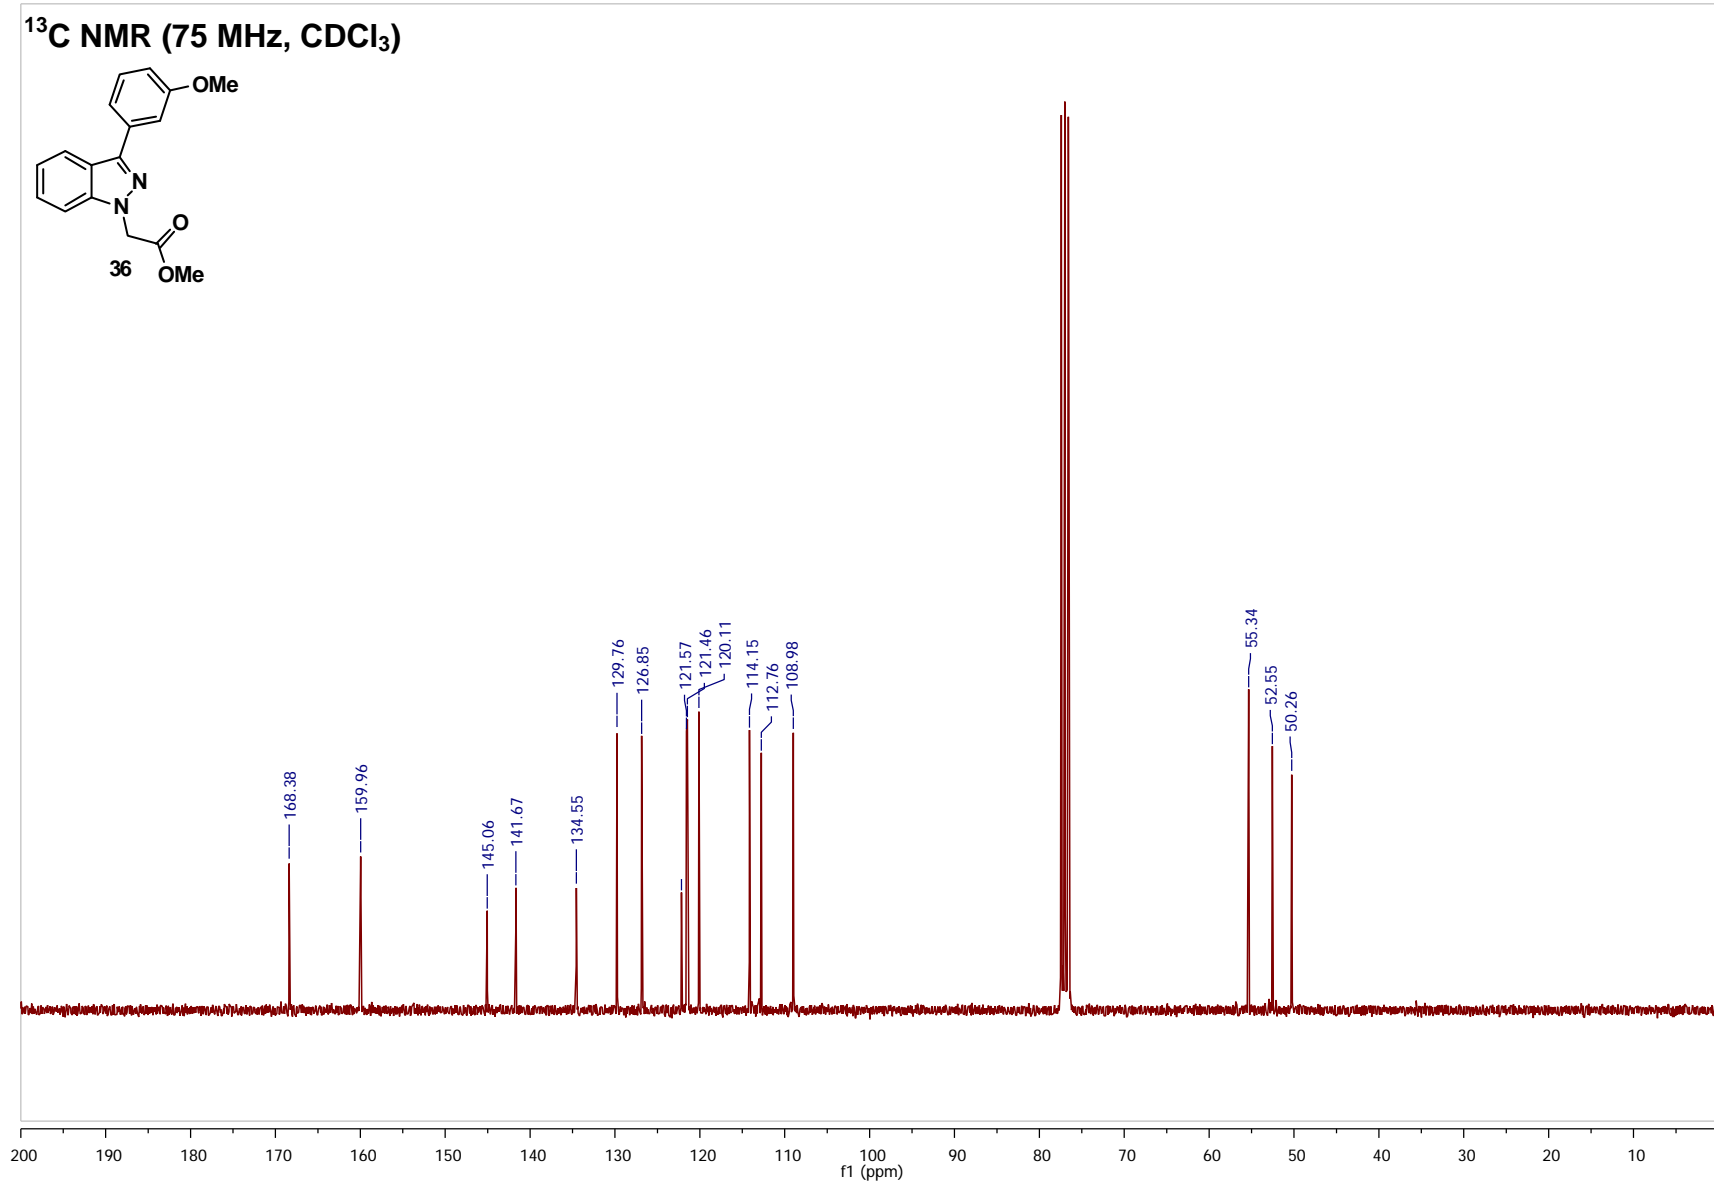

<sup>1</sup>H NMR (300 MHz, CDCl<sub>3</sub>)

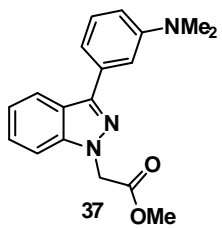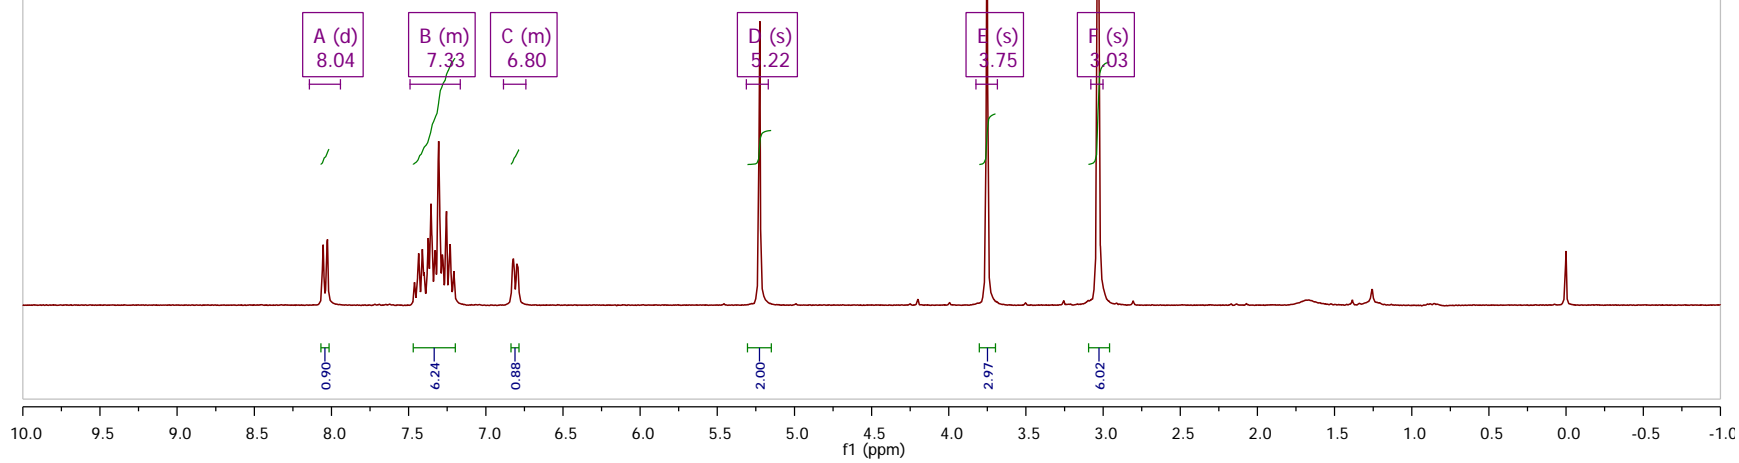

<sup>13</sup>C NMR (75 MHz, CDCl<sub>3</sub>)

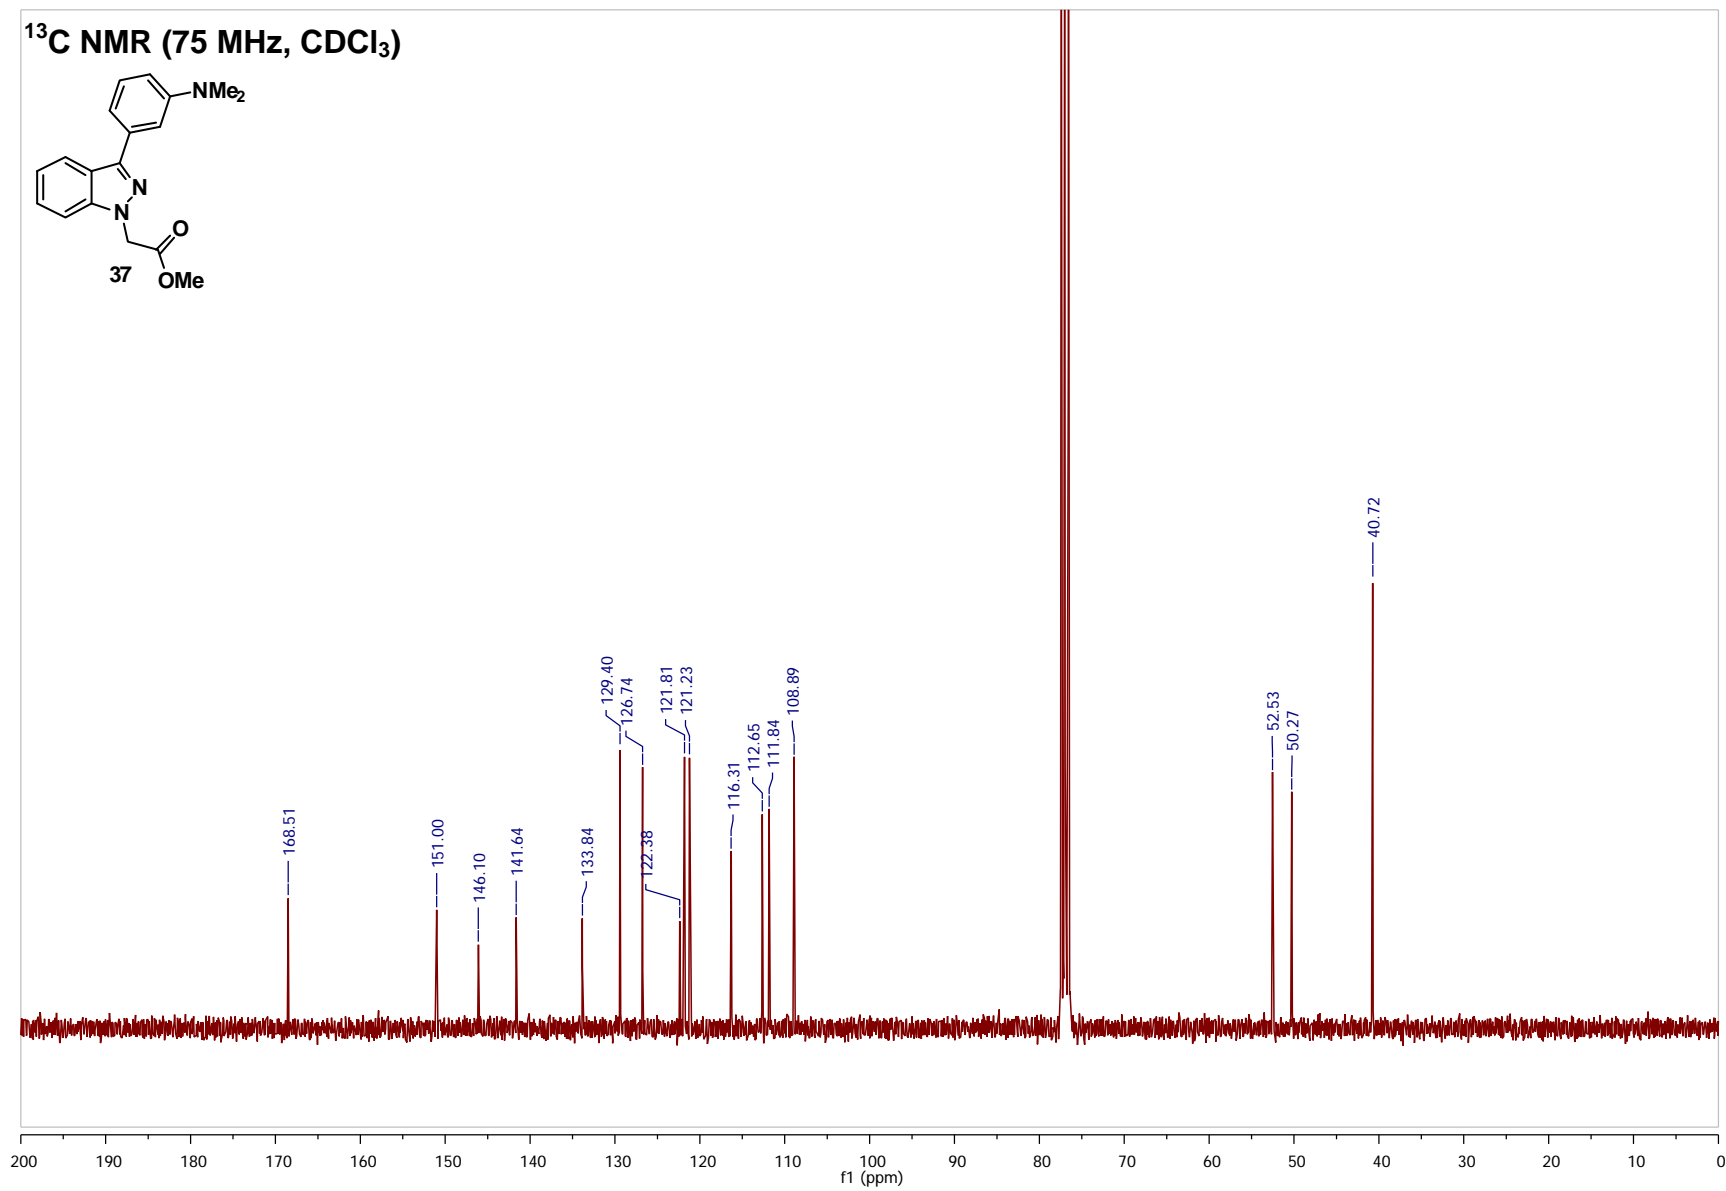

<sup>1</sup>H NMR (300 MHz, CDCl<sub>3</sub>)

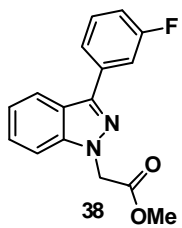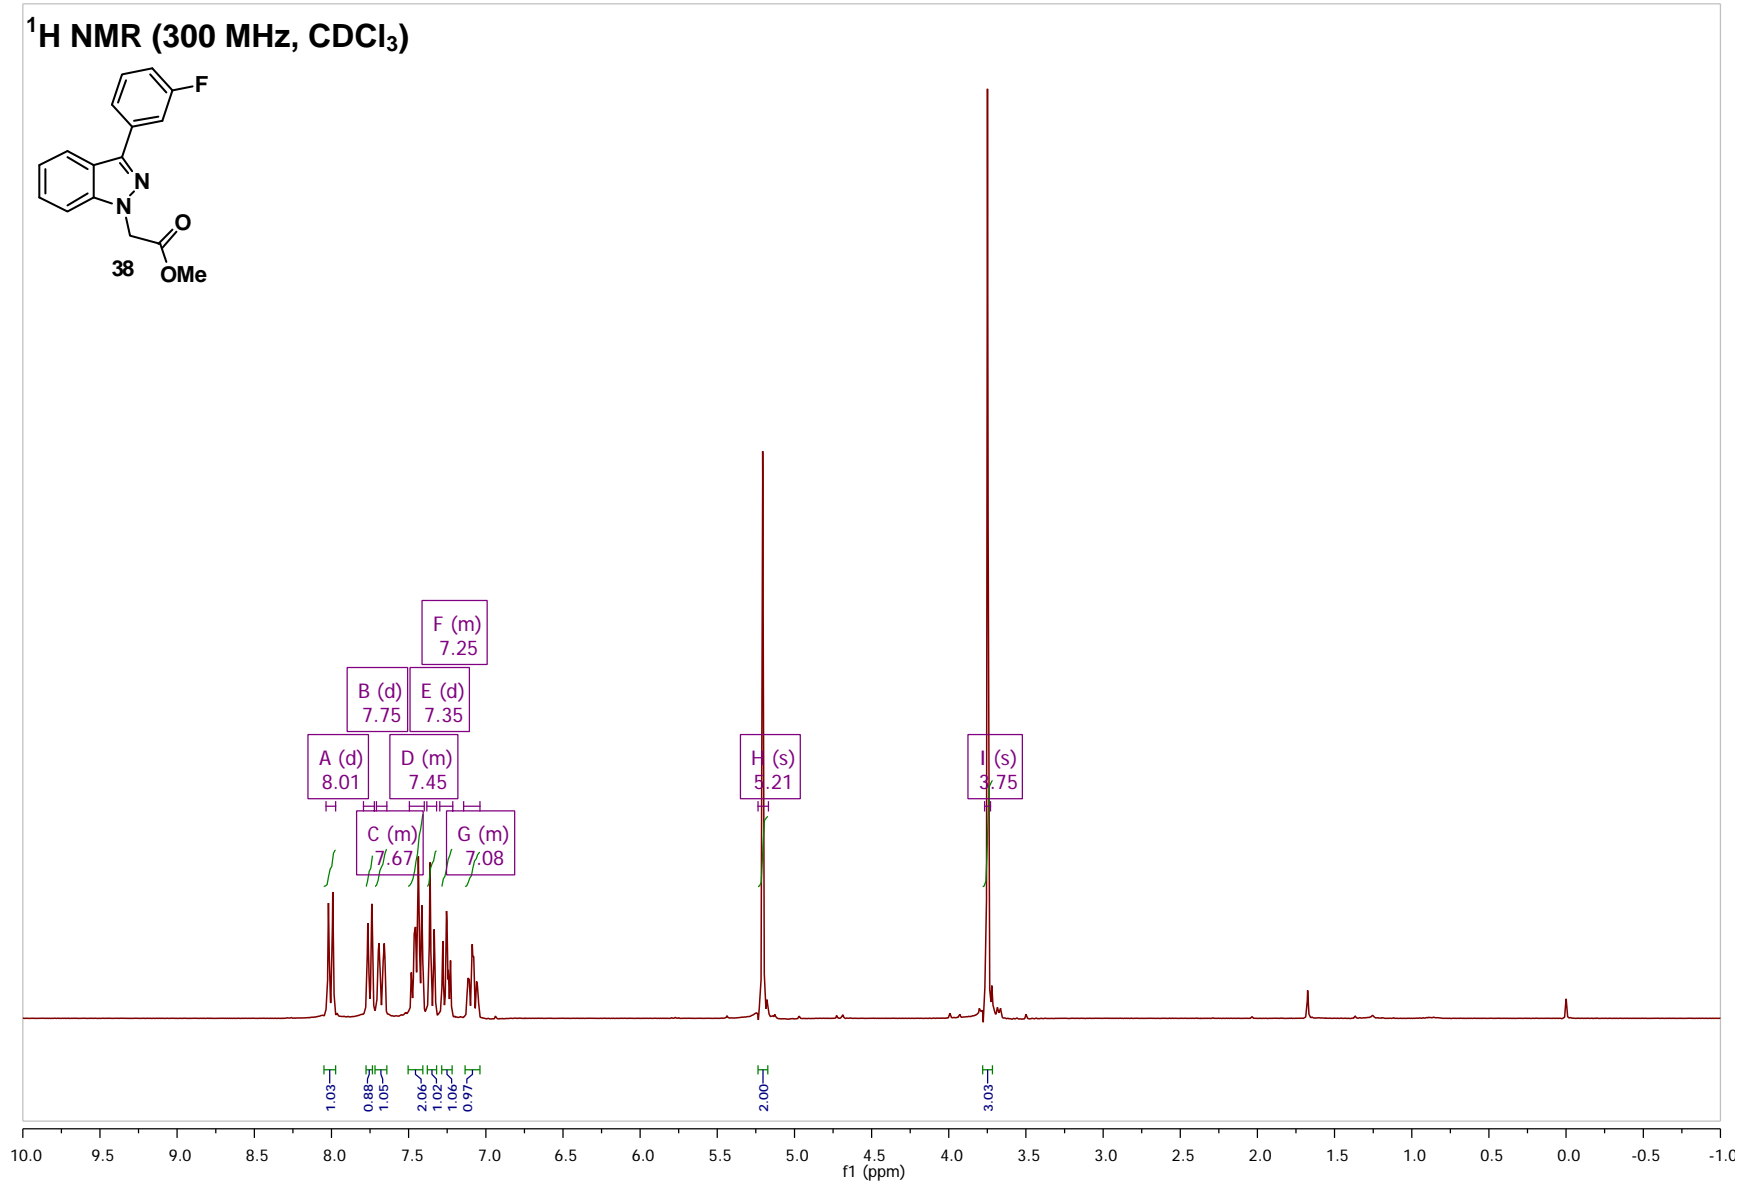

<sup>13</sup>C NMR (75 MHz, CDCl<sub>3</sub>)

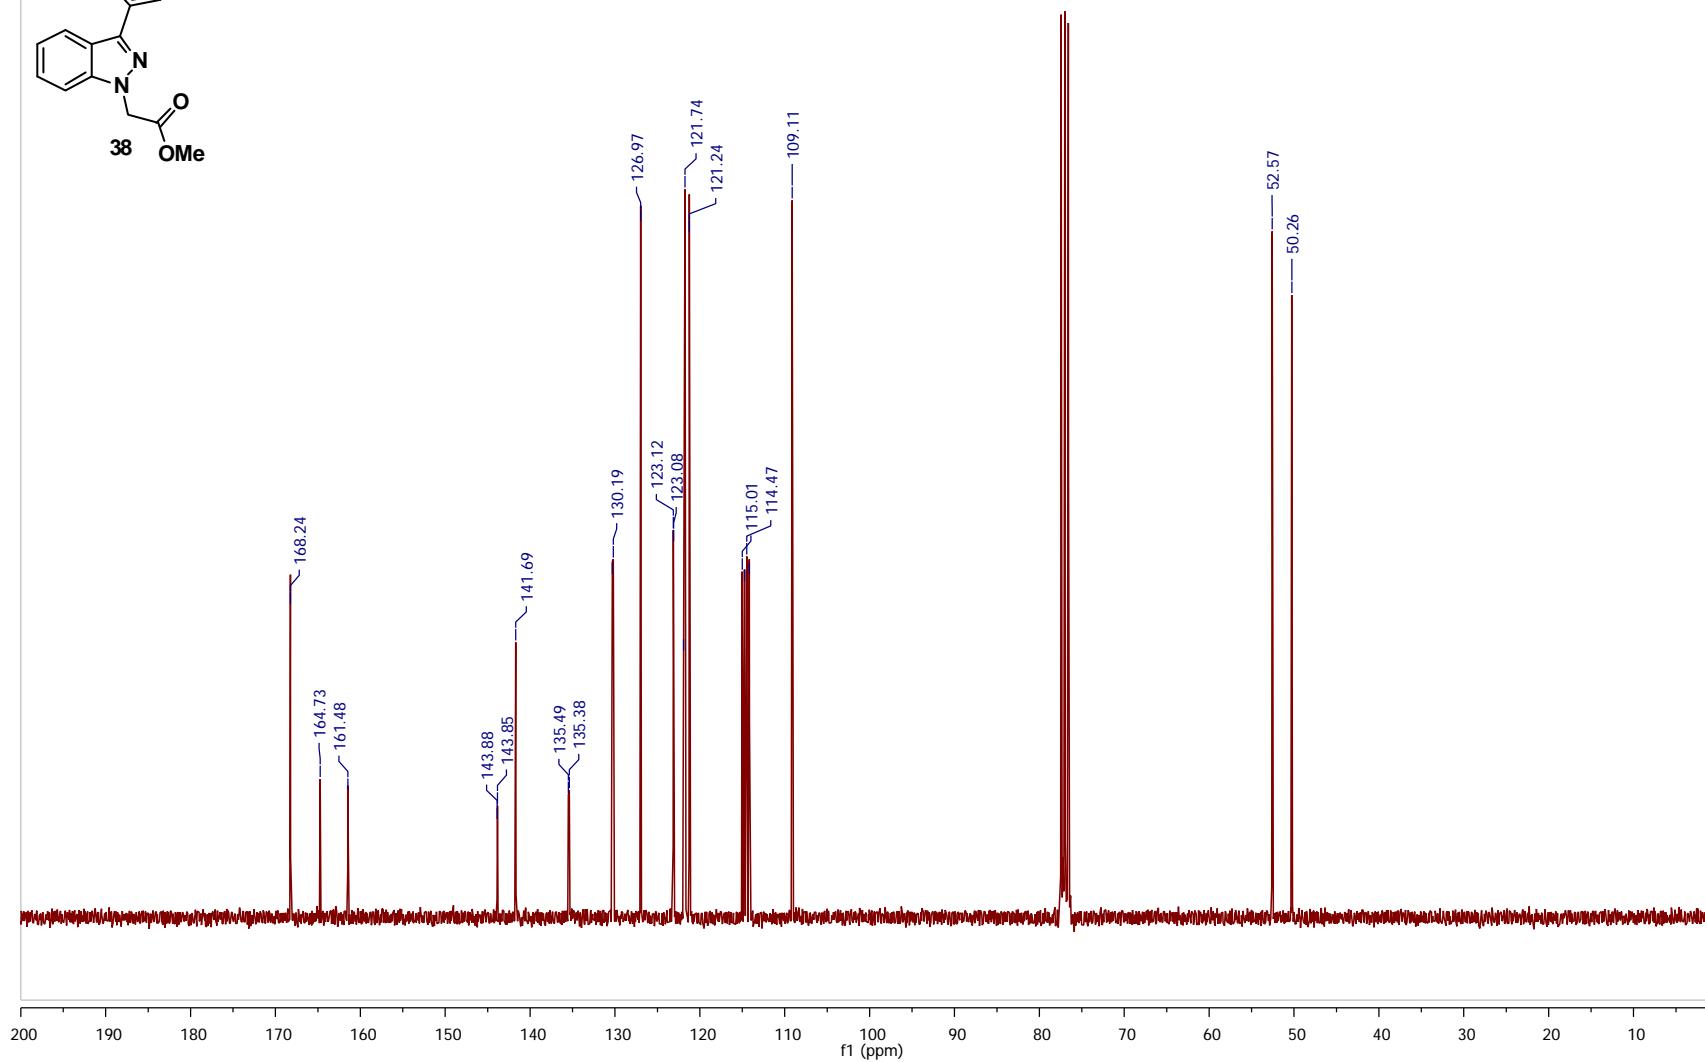



<sup>1</sup>H NMR (300 MHz, CDCl<sub>3</sub>)

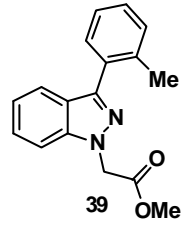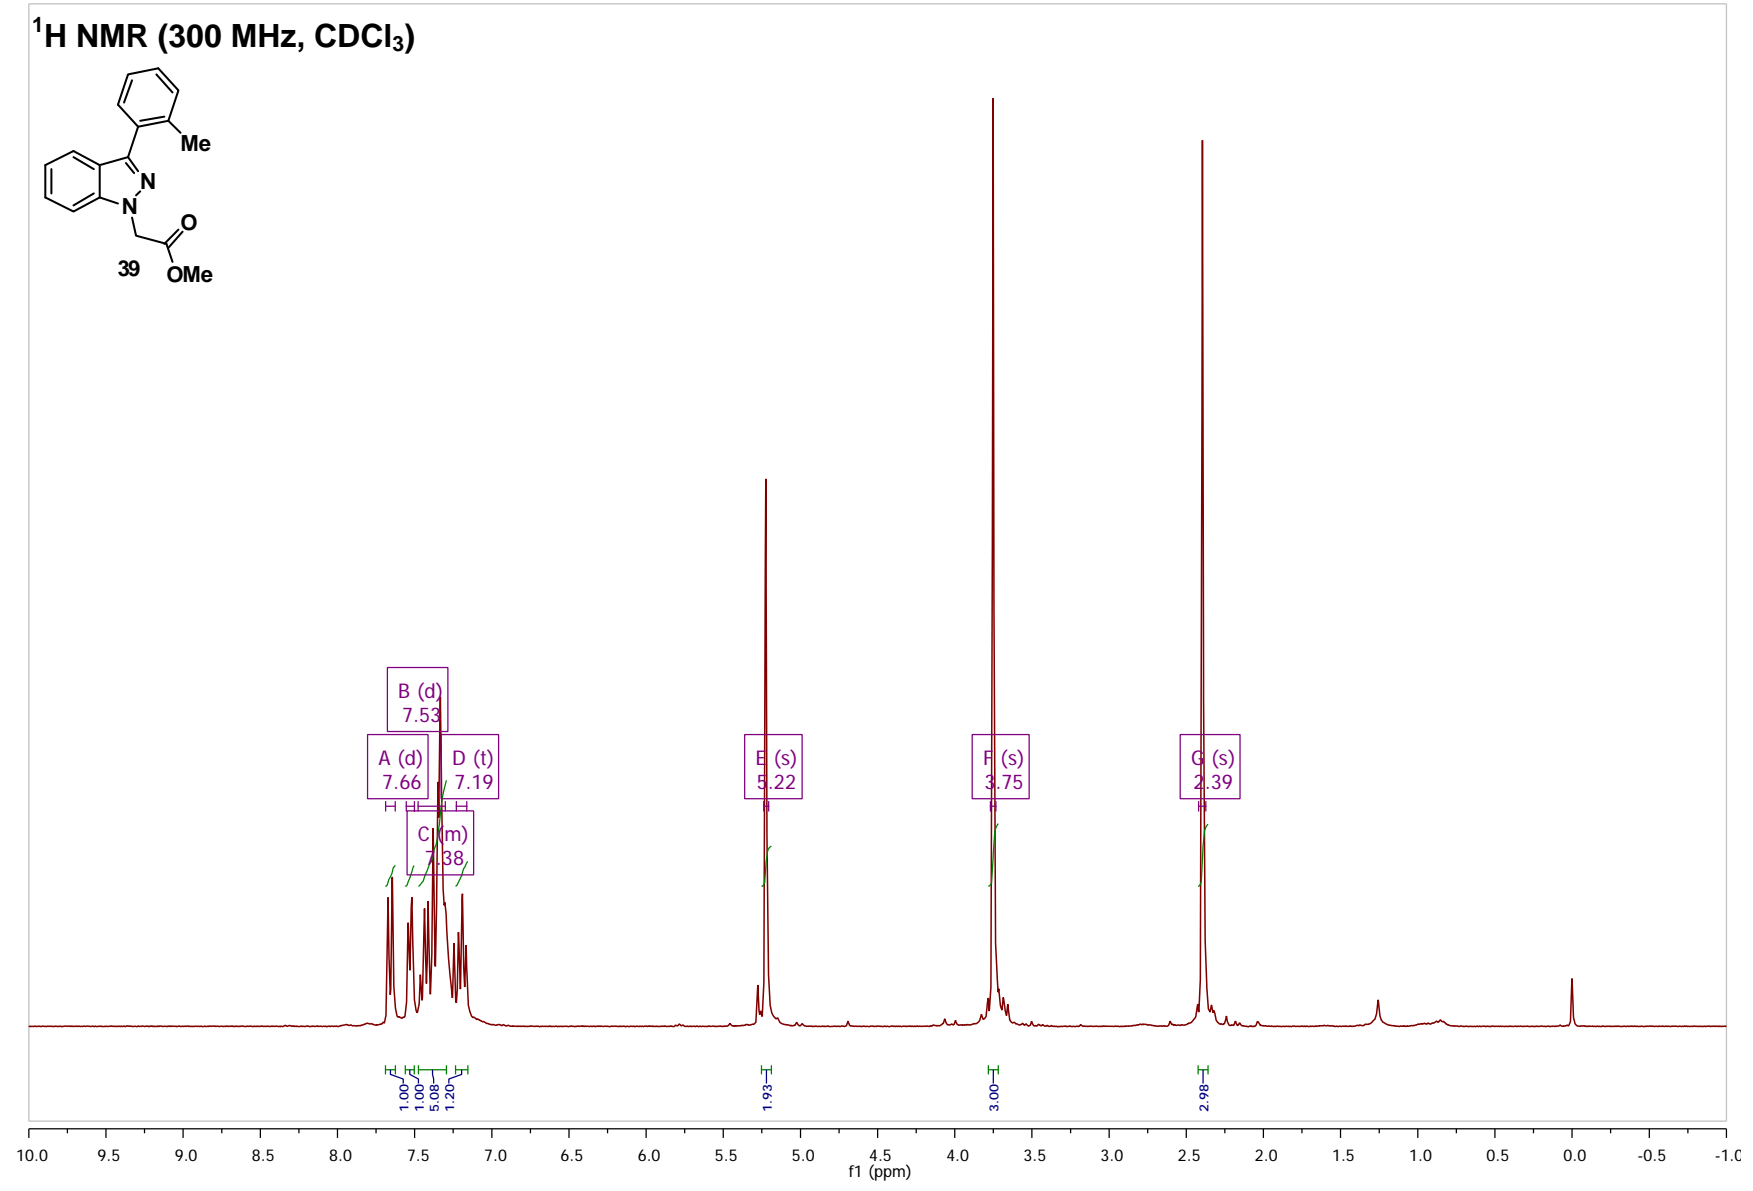

<sup>13</sup>C NMR (75 MHz, CDCl<sub>3</sub>)

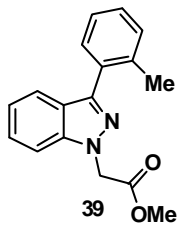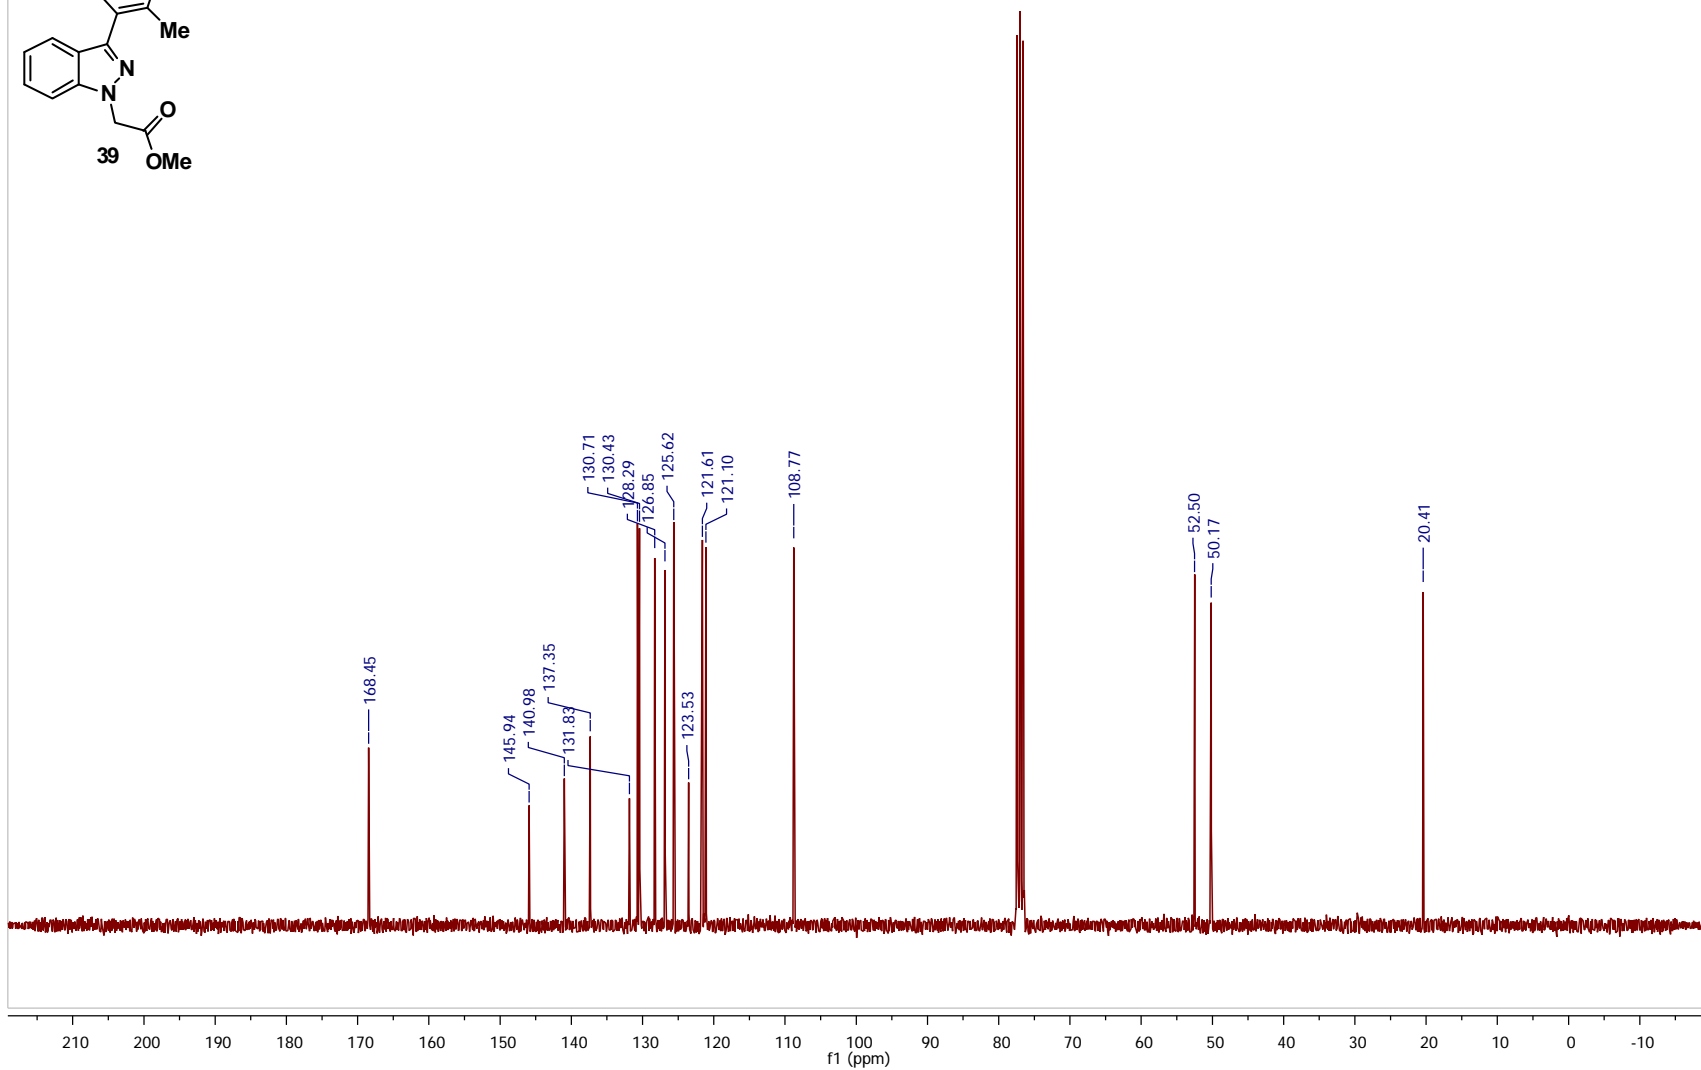

<sup>1</sup>H NMR (300 MHz, CDCl<sub>3</sub>)

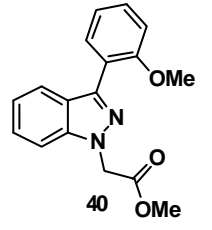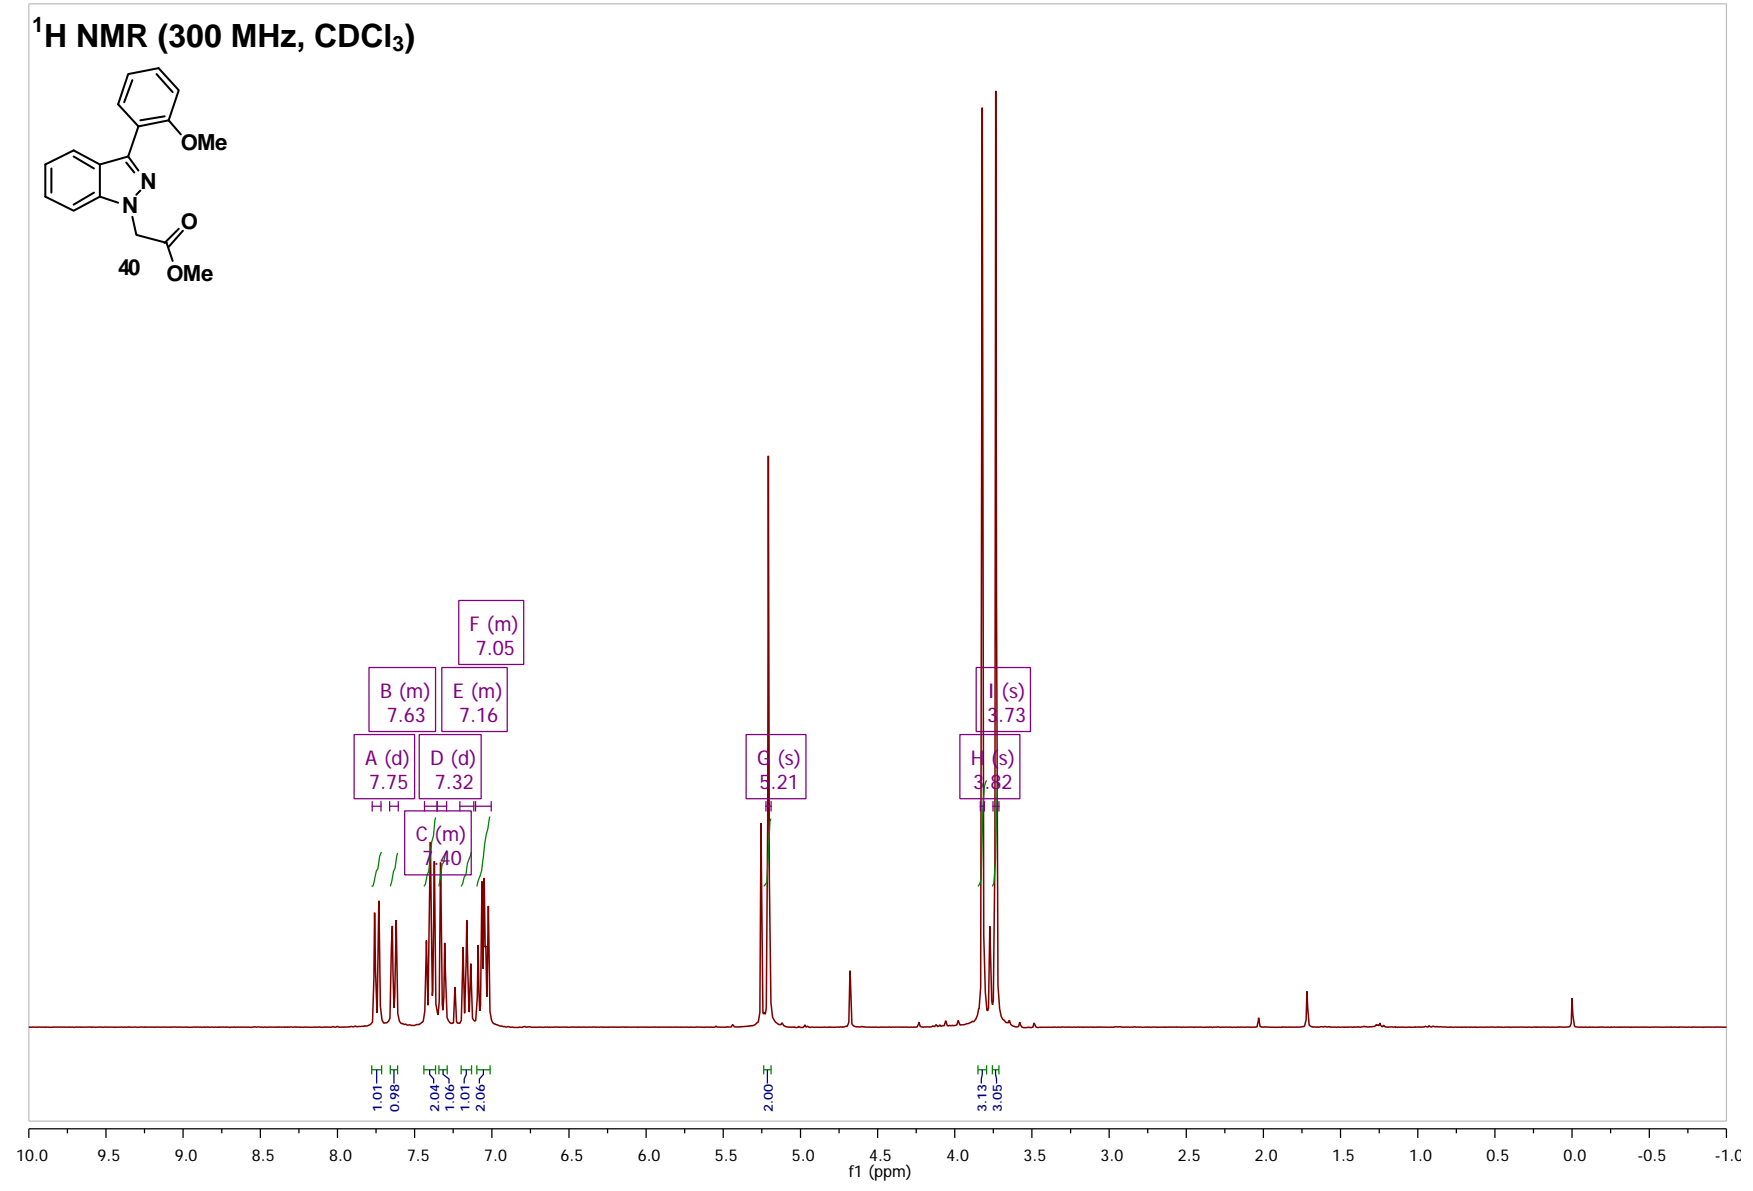

**<sup>13</sup>C NMR (75 MHz, CDCl<sub>3</sub>)**

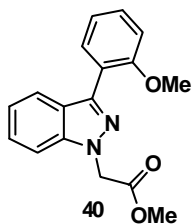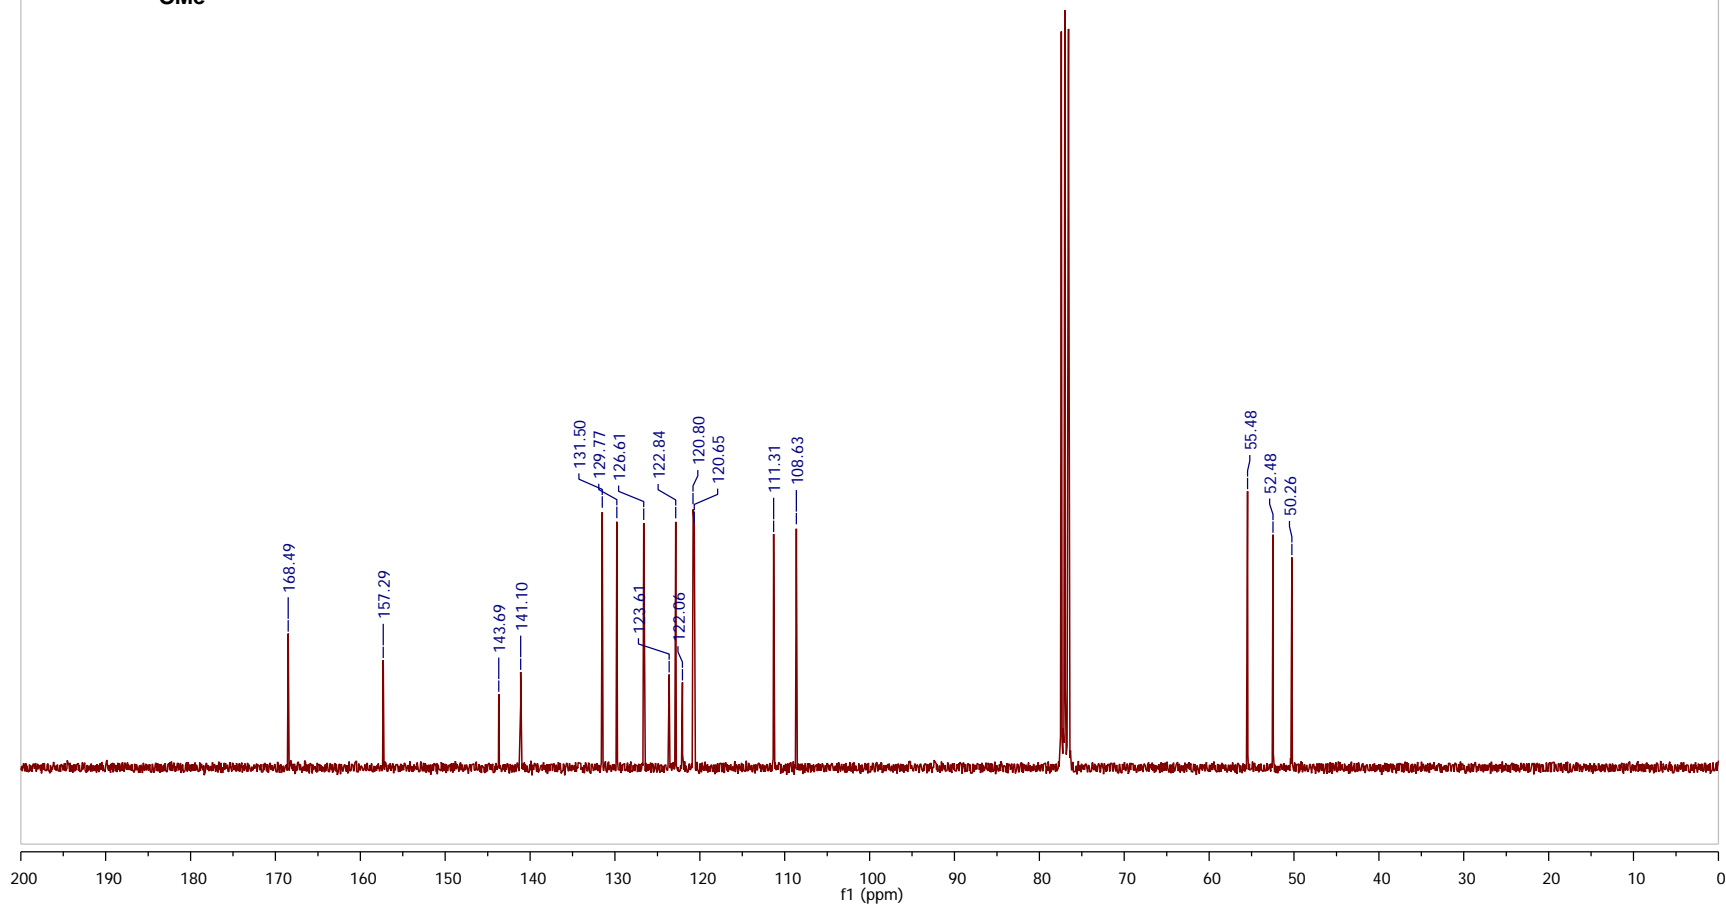

<sup>1</sup>H NMR (300 MHz, CDCl<sub>3</sub>)

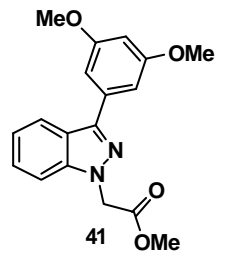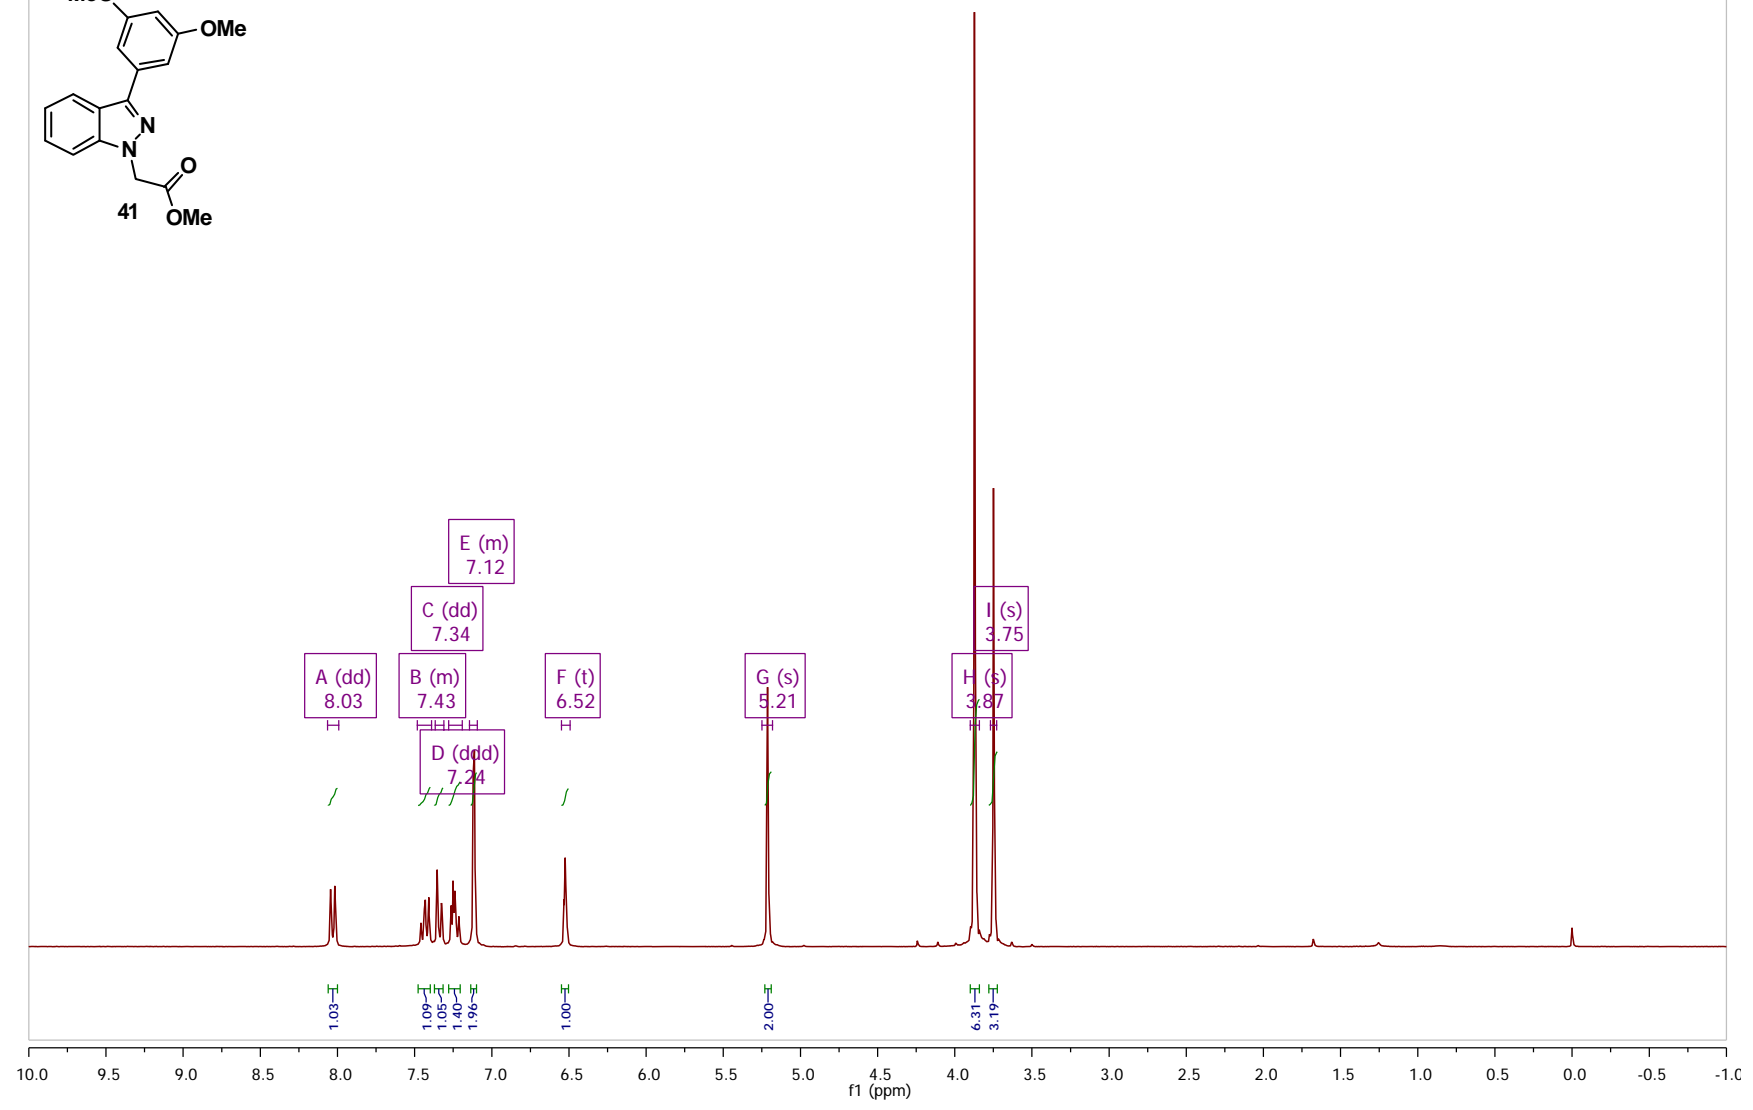

**<sup>13</sup>C NMR (75 MHz, CDCl<sub>3</sub>)**

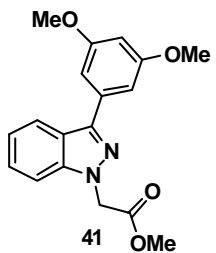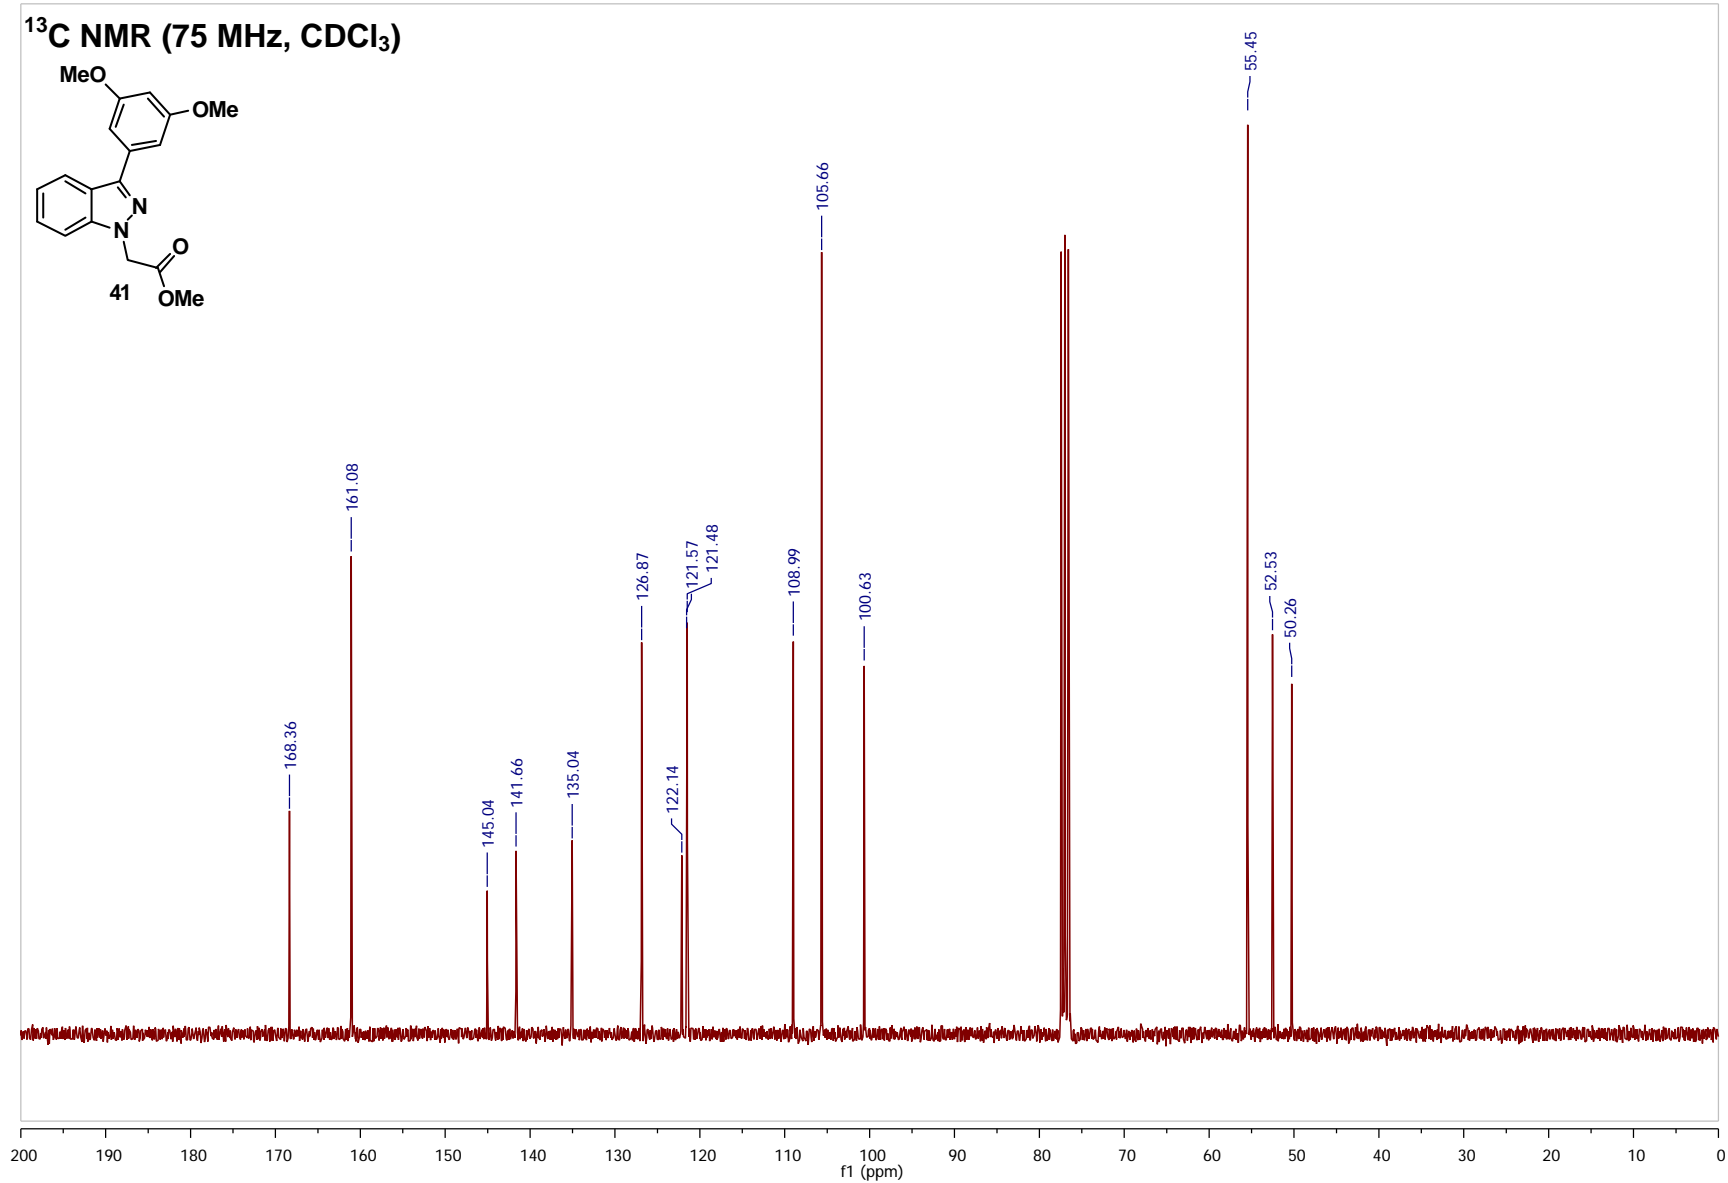

<sup>1</sup>H NMR (300 MHz, CDCl<sub>3</sub>)

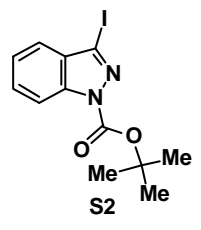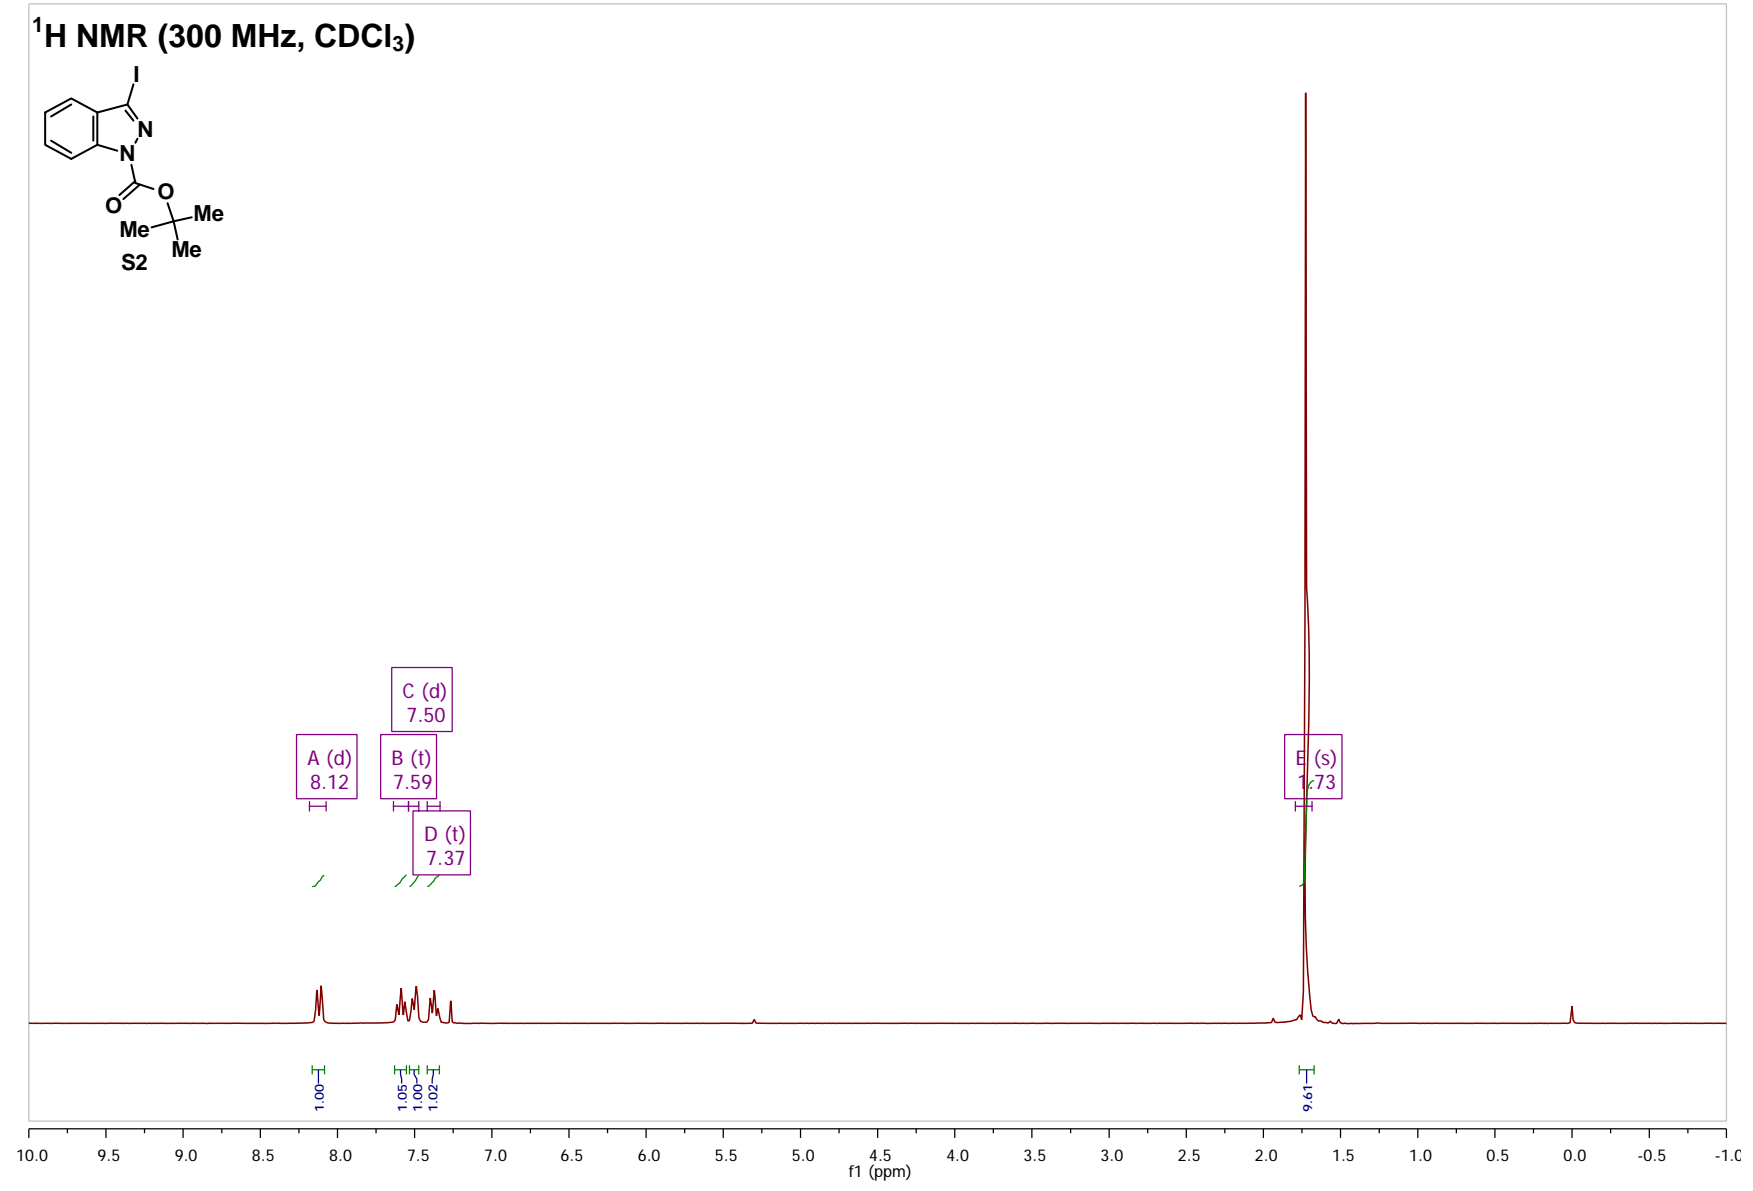

<sup>13</sup>C NMR (75 MHz, CDCl<sub>3</sub>)

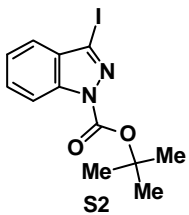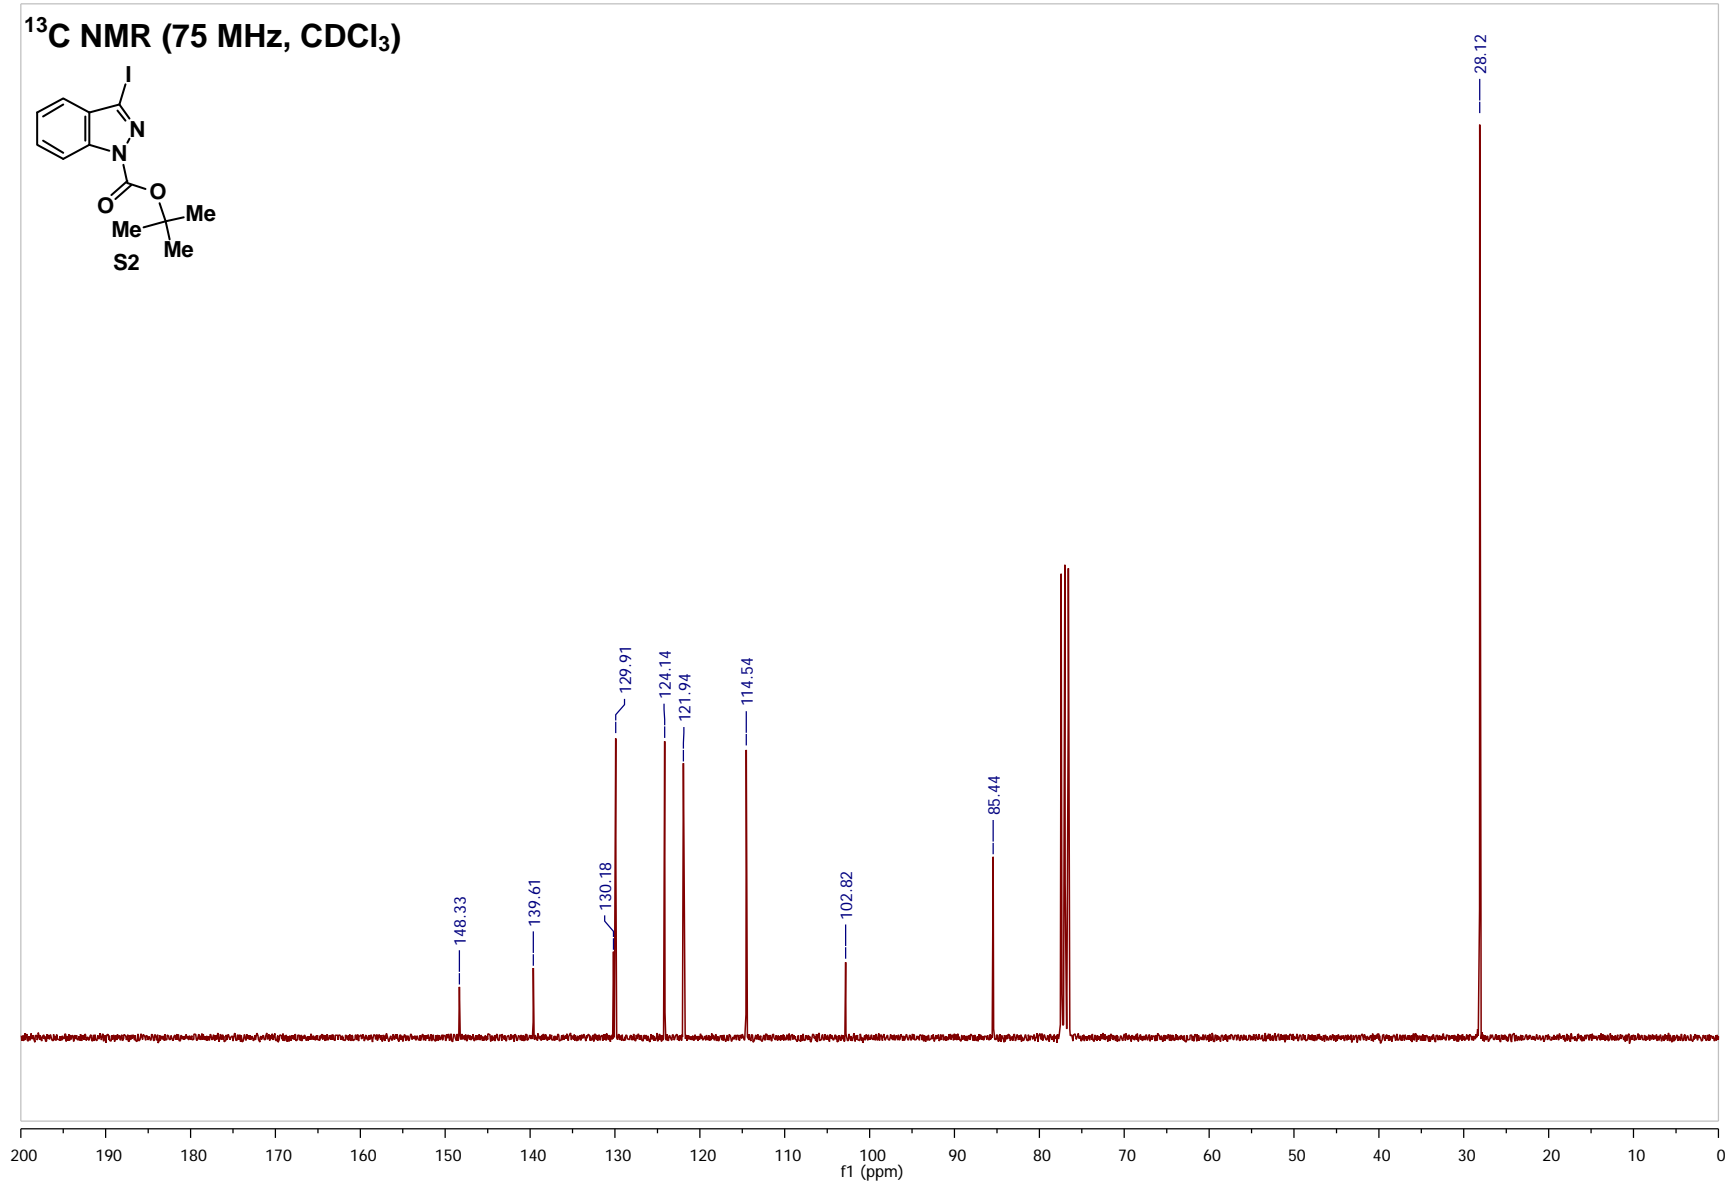



<sup>1</sup>H NMR (300 MHz, CDCl<sub>3</sub>)

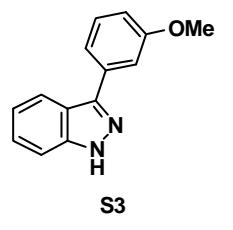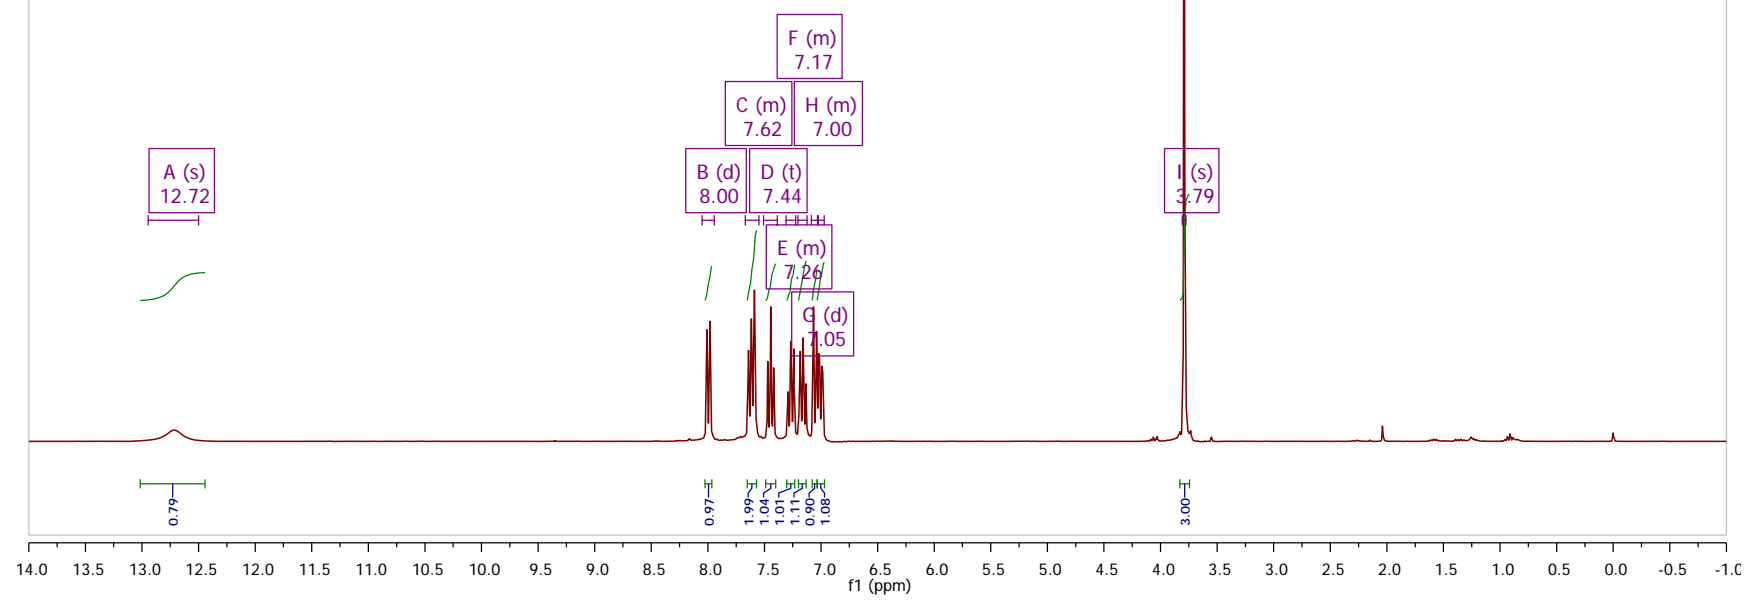

**<sup>13</sup>C NMR (75 MHz, CDCl<sub>3</sub>)**

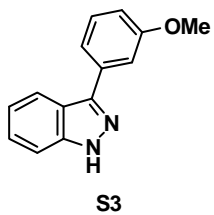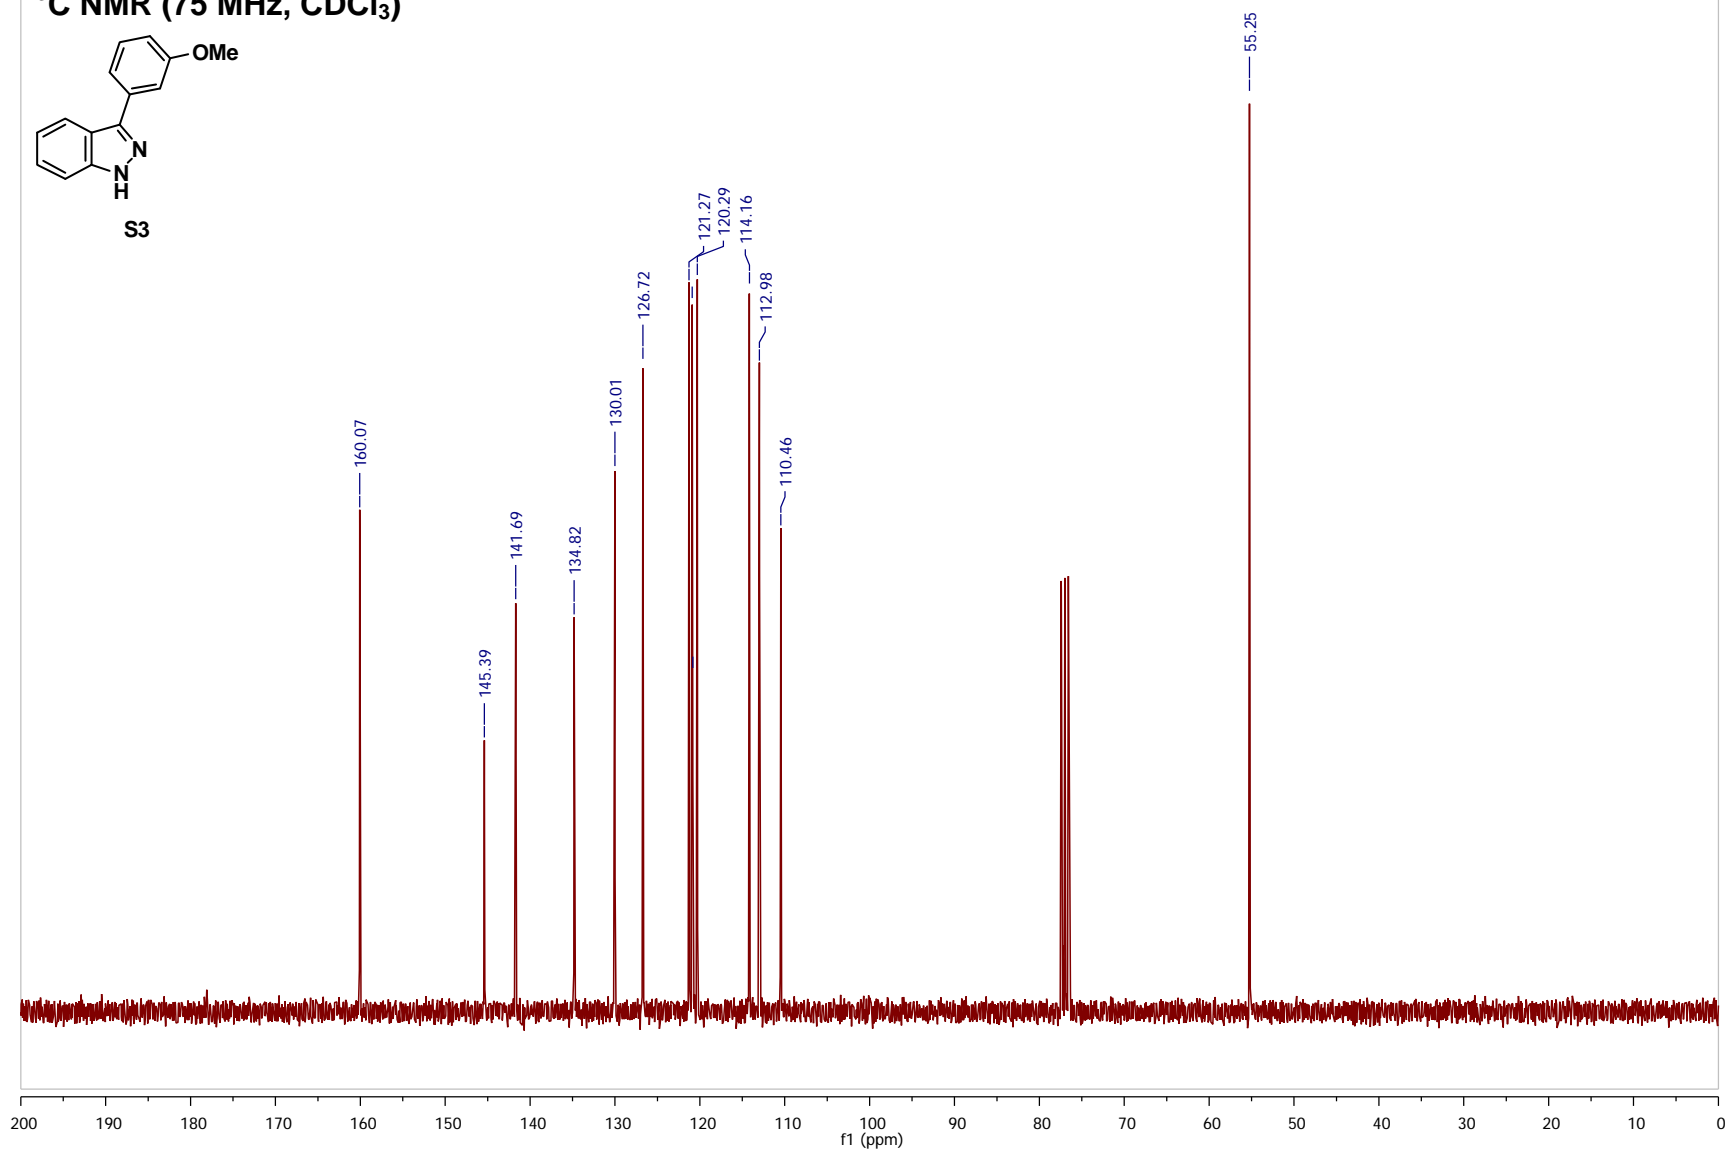

<sup>1</sup>H NMR (300 MHz, CDCl<sub>3</sub>)

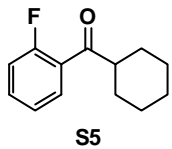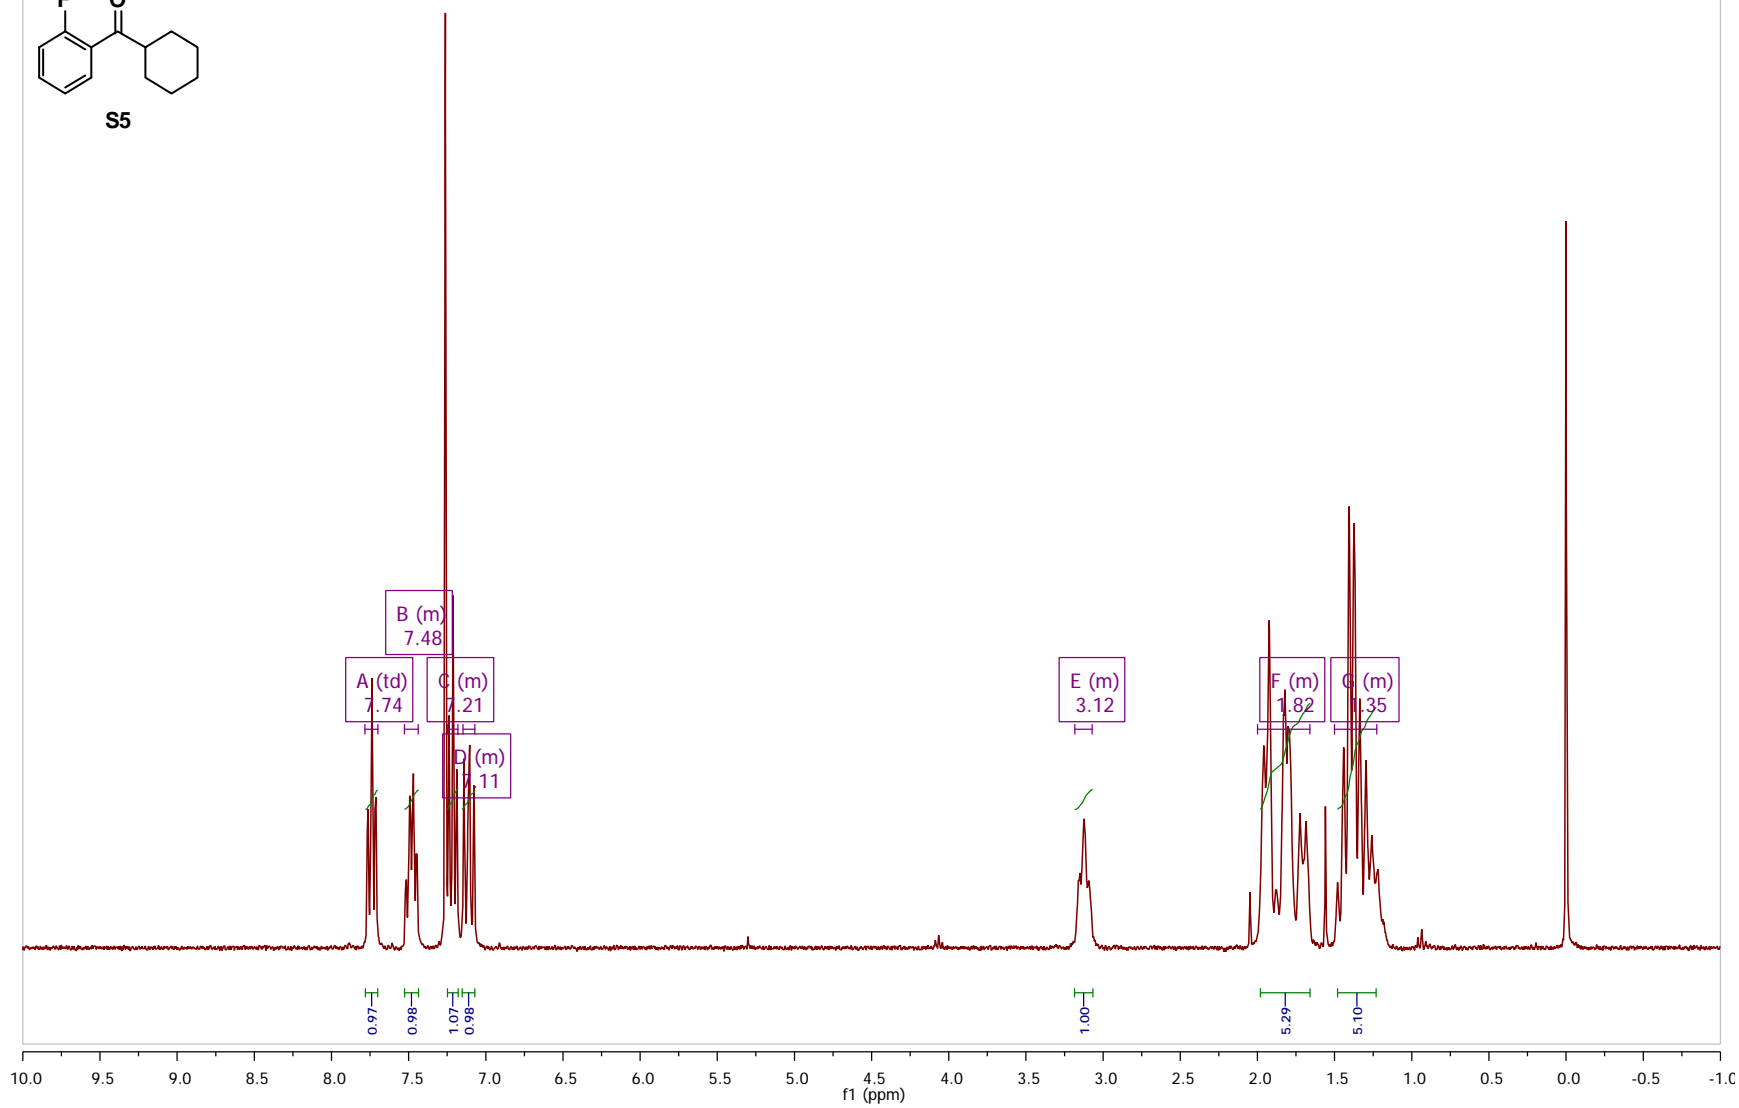

<sup>1</sup>H NMR (300 MHz, CDCl<sub>3</sub>)

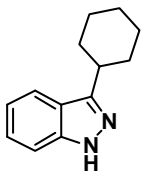

S6

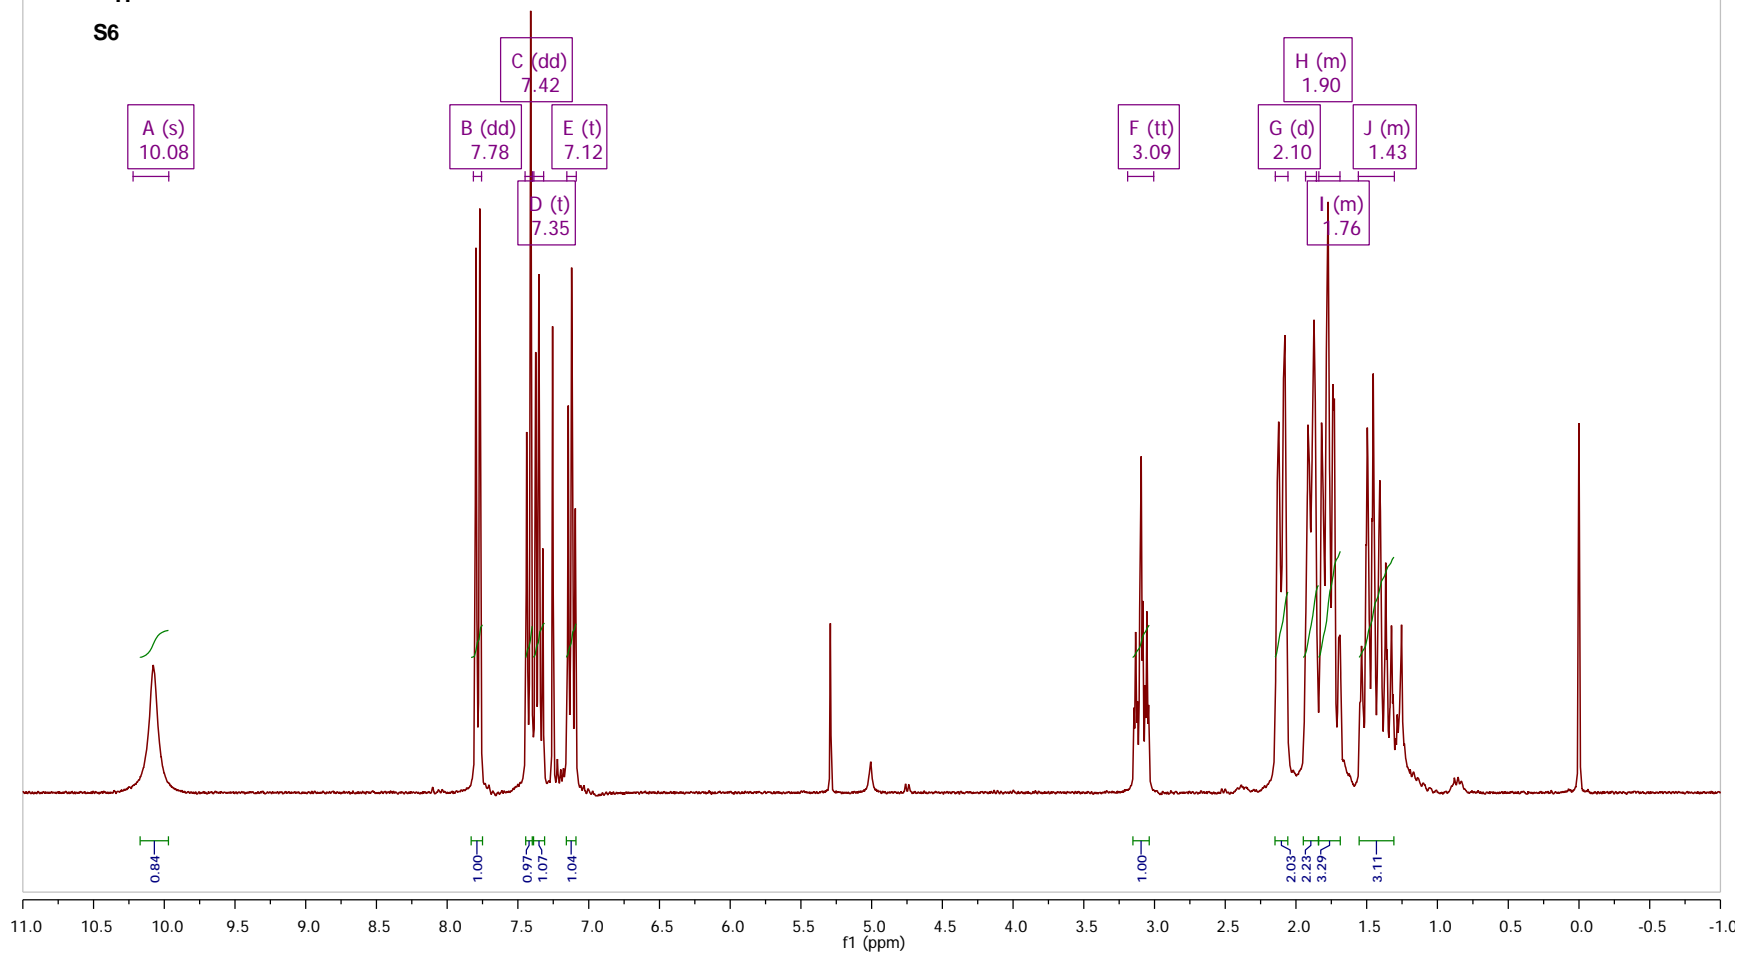

Supplement: Additional file 2 [file 1860-5397-9-171-S2.pdf]
